# 1 Rapid response of fly populations to gene dosage across 2 development and generations

3

4 **Authors:** Xueying C. Li<sup>1,\*#</sup>, Lautaro Gandara<sup>1</sup>, Måns Ekelöf<sup>1</sup>, Kerstin Richter<sup>1</sup>, Theodore  
5 Alexandrov<sup>1,2,3</sup>, and Justin Crocker<sup>1,\*</sup>

6 <sup>1</sup> European Molecular Biology Laboratory (EMBL), Heidelberg, Germany

7 <sup>2</sup> Molecular Medicine Partnership Unit between EMBL and Heidelberg University, Heidelberg, Germany

8 <sup>3</sup> BioInnovation Institute, Copenhagen, Denmark

9 <sup>#</sup> Present address: College of Life Sciences, Beijing Normal University, Beijing, China

10 <sup>\*</sup> Corresponding authors: X.C.L., [lixueying@bnu.edu.cn](mailto:lixueying@bnu.edu.cn), J.C., [justin.crocker@embl.de](mailto:justin.crocker@embl.de)

11

12

13 *“The world was to me a secret which I desired to divine.”*

14 — *Mary Shelley, Frankenstein*

15

## 16 **Abstract:**

17 Although the effects of genetic and environmental perturbations on multicellular organisms are  
18 rarely restricted to single phenotypic layers, our current understanding of how developmental  
19 programs react to these challenges at a systems level remains limited. Here, we have examined  
20 the phenotypic consequences of disturbing the classic *bicoid* network in *Drosophila*, which is  
21 essential for anterior-posterior patterning in the early embryo. This network can be synthetically  
22 perturbed by increasing the dosage of *bicoid*, which causes a posterior shift of the network’s  
23 regulatory outputs and a decrease in fitness. To directly monitor network changes across  
24 populations and time with extra copies of *bicoid*, we performed genome-wide EMS mutagenesis,  
25 followed by experimental evolution. After only 8-15 generations, experimental populations have  
26 normalized patterns of gene expression and increased survival. Using a phenomics approach, we  
27 find that populations were normalized through rapid increases in embryo size driven by maternal  
28 changes in metabolism and ovariole development. We extend our results to additional  
29 populations of flies, demonstrating predictability. Together, our results necessitate a broader  
30 view of regulatory network evolution at the systems level. In the future, such synthetic evolution  
31 approaches using animal models could provide a generalizable platform for studying the  
32 propagation of genetic perturbations across the many layers of complex multicellular systems.

### 33 **Introduction**

34 Changes in gene regulation underlie much of phenotypic evolution<sup>1</sup>. However, our  
35 understanding of regulatory evolution is likely biased<sup>2</sup>, as most evidence is derived from  
36 observations of sparse natural variation or limited experimental perturbations<sup>3</sup>, especially in a  
37 developmental context. Furthermore, developmental networks orchestrate multiple processes that  
38 span a range of organizational scales—from single cells to tissues and organs and to entire  
39 organisms<sup>4</sup>. These complex regulatory programs also integrate metabolic states<sup>5</sup> and  
40 environmental cues in response to complex ecologies<sup>6,7</sup>. However, developmental networks are  
41 often explored using a reductionist approach, focusing on particular time windows or pathways  
42 of development<sup>8</sup>. While such approaches have been foundational to our understanding of  
43 development, this narrow focus may have limited our understanding of other ‘possible’ paths of  
44 regulatory evolution that are not taken in nature<sup>9</sup>. A more unbiased view might teach us about the  
45 constraints that govern evolutionary trajectories.

46 Quantitative genomics further challenges our models of how regulatory networks  
47 function—for complex traits, most of the heritability is likely due to a large number of variants,  
48 each with a small effect size<sup>10</sup>. Thousands of individual genes may contribute to phenotypes  
49 through expression in relevant cells<sup>10</sup>, and the contributions of each genetic variant to  
50 developmental fates are often small and challenging to measure<sup>11–13</sup>. Therefore, it is essential to  
51 consider regulatory evolution and development both at the systems level and across  
52 populations<sup>14–16</sup>. Clearly, approaches to elicit the relationships between different phenotypic  
53 layers and how these changes manifest across populations are needed to understand the evolution  
54 of developmental regulatory networks.

55 In this study, we explored the well-characterized early embryonic segmentation network  
56 in *Drosophila*<sup>17</sup> in response to extra copies of *bicoid*, a key morphogen in *Drosophila* embryonic  
57 development. We were able to directly monitor developmental changes that rescue or mitigate  
58 the phenotypic defects caused by altered gene expression and, in some cases, to even generate  
59 novel phenotypes. We found that compensatory changes for developmental perturbation can  
60 appear rapidly in the lab, with extensive phenotypic changes in gene expression, metabolism, and  
61 maternal anatomical features. Finally, we suggest that patterns observed in laboratory evolution  
62 can recapitulate phenotypic diversity in nature.

63

## 64 **Rapid population responses to extra copies of *bicoid***

65       The *bicoid* network in *Drosophila melanogaster* is one of the best-understood  
66 developmental networks<sup>18</sup>. Bicoid is a transcription factor, the mRNA of which is maternally  
67 deposited at the anterior of the egg and forms a concentration gradient along the anterior-  
68 posterior (A-P) axis in the early embryo (**Fig. 1a-b, Supplemental Data File 1**). The gradient  
69 provides positional information for downstream target genes, such as *hunchback* (*hb*), *giant* (*gt*),  
70 *Kruppel* (*Kr*), and *even-skipped* (*eve*). These genes and others together constitute a complex  
71 network that determines segmentation<sup>19</sup> and scaling<sup>20,21</sup> along the A-P axis of the embryo. The  
72 network directly responds to an increase in the gene dosage of *bicoid* (wild-type to 4x, **Fig. 1a-**  
73 **c**), whereby the increased  $\lambda$  of a steady-state exponential gradient (**Fig. 1d**) results in a shift of  
74 the cephalic furrow toward the posterior<sup>19</sup>, indicated by a posterior shift in the expression of *eve*,  
75 an essential segmentation gene expressed in a striped pattern (**Fig. 1e-f**). Despite the positional  
76 defects, embryos carrying two extra copies of the *bicoid* locus (*4xbcd*) can develop into normal  
77 adults—albeit with an increased frequency of cuticle defects (**Fig. 1g-i**) and reduced viability to  
78 adulthood<sup>22,23</sup> (68.5%, **Fig. 1j, Table S1**).

79       The reduced viability of *4xbcd* flies is a fitness disadvantage that can be a selection  
80 pressure in experimental evolution (**Fig. 1k**). To explore the system's capacity to respond to a  
81 perturbation of Bicoid levels, we established 15 parallel laboratory populations from 7 pools of  
82 chemically mutagenized *4xbcd* flies (including replicates, see **Fig. S1**), along with three non-  
83 mutagenized populations which represent the standing variation in the lab stock. Based on  
84 whole-genome sequencing data, we estimated that the chemical mutagenesis with Ethyl  
85 methanesulfonate (EMS) introduced, on average, 2.7 point mutations per Mb. Thus, we  
86 estimated that the founding populations contained 1.7 million novel mutations (see **Methods**,  
87 **Fig. S1c**), providing genetic diversity for selection. We maintained the populations under  
88 standard laboratory conditions from the 4<sup>th</sup> generation after mutagenesis, after the generally  
89 deleterious mutations were purged in the first three generations, to select for compensatory  
90 mutations that can rescue or mitigate the fitness defect. We primarily used *eve* stripe positions as  
91 an indicator for compensatory changes: the compensated embryos should show *eve* stripes  
92 positions shifted to the anterior of the ancestral *4xbcd* line [ $37.2 \pm 0.4\%$  egg length (EL) for the  
93 first *eve* stripe, 95% confidence interval, Generation 4] and closer to the wild-type positions  
94 ( $28.3 \pm 0.6\%$  EL for the first stripe, VK33).

95 We found that compensation for the higher *bicoid* dosage occurred rapidly in our  
96 experimental populations. From the 4<sup>th</sup> to the 8<sup>th</sup> generation, the first *eve* stripe shifted to the  
97 anterior (toward the wild-type position) on average by 1.1% EL, from  $37.2 \pm 0.4\%$  EL to  $36.1 \pm$   
98  $0.2\%$  EL ( $p < 0.01$ , Wilcoxon test) (all populations aggregated, **Fig. 11, bottom panel**). Other  
99 stripes also showed different magnitudes of anterior shifts compared to Generation 4, ranging  
100 from 0.4% EL (stripe 7,  $p = 0.04$ , Wilcoxon test) to 1.0% EL (stripe 3 and 4,  $p < 0.01$ , Wilcoxon  
101 test) (**Fig. 11, bottom panel**). Among these populations, there were heterogeneous responses in  
102 *eve* positions (**Fig. 11, top panel**), with populations 1-1-3A and 2-6-1A showing significant  
103 compensatory shifts in more than one stripe in Generation 8 (**Fig. 11L, Fig. S2A**). Other  
104 populations showed different levels of shifts in *eve* stripes ranging from -2% EL to +2% EL (**Fig.**  
105 **S2a**), but the statistical power in detecting these shifts was low due to a limited sample size. We  
106 did not find a higher similarity between replicate populations from the same mutant pool than  
107 those from different pools. Interestingly, the compensatory shifts in population 1-1-3A occurred  
108 through a shortened anterior region, whereas population 2-6-1A compensated via an expansion  
109 in the posterior region, suggesting multiple possible mechanisms for compensation (**Fig. S2b-f**).  
110 These shifts could not be explained by loss of *bicoid* expression because the Bicoid gradient in  
111 the evolved population remained the same as the *4xbcd* ancestor line (**Fig. S2g**). Although these  
112 shifts are subtle compared to the drastic difference between *2xbcd* and *4xbcd*, a shift of 1% EL  
113 was the highest level of natural variation ever reported in *D. melanogaster*<sup>24</sup>, suggesting that the  
114 early embryonic segmentation network can shift rapidly in the lab under directed selection. In  
115 addition, the experimental populations showed increased viability, as measured by survival rates  
116 to eclosure after 16 generations ( $74.2 \pm 2.5\%$ , averaged across all populations) compared to the  
117 ancestral line ( $66.3 \pm 3.4\%$ ), consistent with adaptation (**Fig. S1d**).

118 Unexpectedly, we found that compensation in the *bicoid* network coincided with an  
119 increase in egg length across the populations. From the 4<sup>th</sup> to the 8<sup>th</sup> generation, median embryo  
120 length increased from 550  $\mu\text{m}$  to 567  $\mu\text{m}$  (all populations aggregated, **Fig. 1m**, histogram,  $p =$   
121  $1.81\text{e-}09$ , Wilcoxon test). Strikingly, despite variable embryo sizes, nine out of 12 populations  
122 showed an increase in median embryo length (1-1-1A, 2-2-1A, 2-2-2A, 2-3-1A, 2-3-2A, 2-4-1A,  
123 2-5-1A, 2-5-2A, and 2-6-1A; **Fig. 1m**, colored lines) and three of them (2-2-2A, 2-5-1A, 2-6-1A)  
124 were statistically significant ( $p < 0.05$ , Wilcoxon test; **Fig. S2c**). This recurrent pattern suggests  
125 that an increase in embryo length might provide a quickly accessible mechanism to buffer the

126 developmental stress caused by overexpression of *bicoid* and thus could drive the rapid  
127 compensatory changes we observed.

128         In parallel to phenotypic changes, we also found recurrent directional changes at the  
129 genomic level consistent with selection (**Fig. S3**). We performed low-coverage whole-genome  
130 sequencing for all 18 populations at the 3<sup>rd</sup> and 7<sup>th</sup> generation and focused on changes in allele  
131 frequency in common variants shared across populations (i.e. standing variation) to understand  
132 the population dynamics at a broad scale. We found 16,394 biallelic variants showing consistent  
133 increases or decreases in allele frequency in two or more populations (Fisher's exact test, FDR-  
134 adjusted  $p < 0.05$ , **Supplemental Data File 2**). Based on a sign test, 181 of them were biased  
135 toward being maintained or purged in six or more populations (**Fig. S3c**). Recurrent gain or loss  
136 of these alleles across multiple populations could suggest selection. For example, a non-  
137 synonymous mutation in Melted (F21V) was purged in six populations at the 7<sup>th</sup> generation (**Fig.**  
138 **S3d**), which could be beneficial because *melted* was linked to growth and metabolic pathways,  
139 and its mutant showed nutrient deprivation<sup>25</sup>. Other variants potentially under directed selection  
140 include those related to metabolism (e.g. *Apoltp*, **Supplemental Data File 2**) and ovariole  
141 development (e.g. *mtgo*, *bru3*, **Fig. S3d**, **Supplemental Data File 2**)<sup>26</sup>. These changes in allele  
142 frequency are consistent with rapid adaptation in the laboratory populations, with possible links  
143 to maternal and metabolic-related genes. However, given that non-EMS replicates also shifted  
144 their sizes, we next focused on phenotypic changes that could compensate for the detrimental  
145 effects of Bicoid-overexpression.

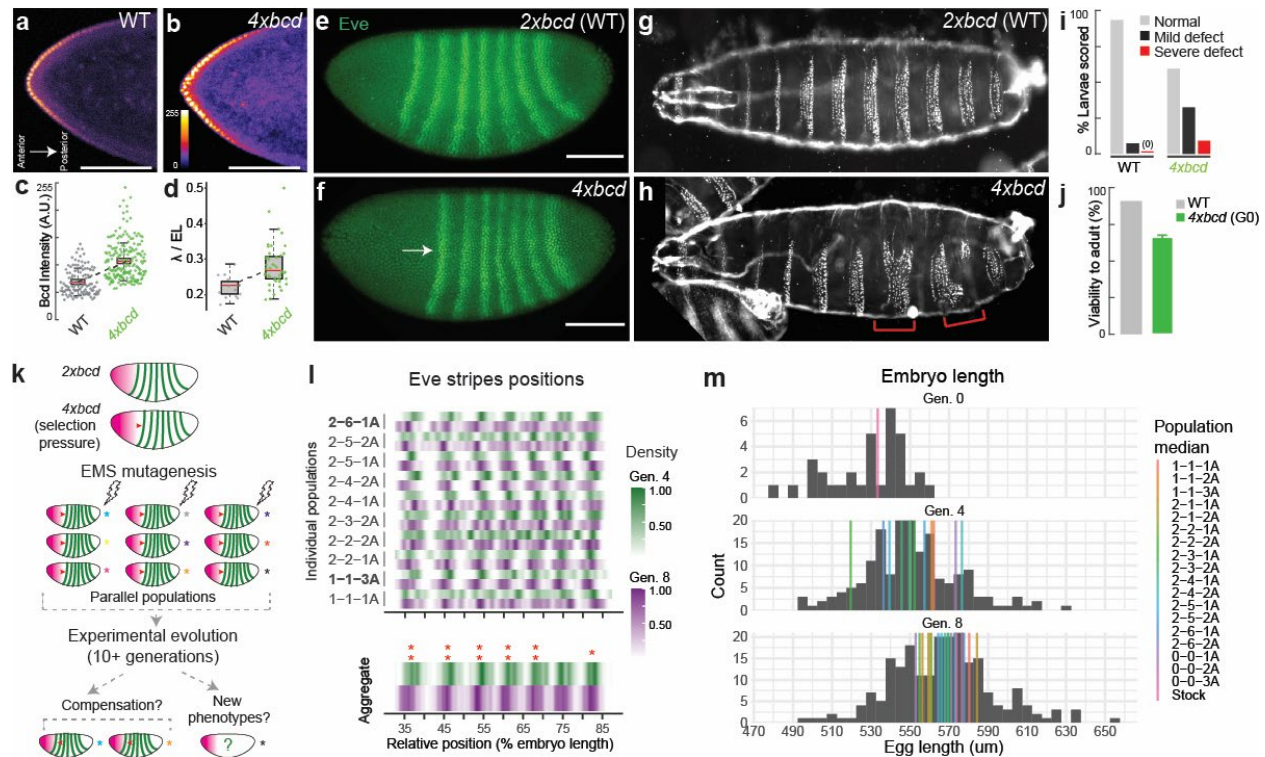

146

147 **Fig. 1. Rapid changes of the *bicoid* network after experimental perturbation.**

(a, b) Bicoid gradient along the anterior-posterior axis in embryos with two (wild-type) or four copies of *bicoid* (anti-Bicoid immunostaining, stage 4 embryos. Scale bar = 100  $\mu$ m.). (c) Bicoid levels in the ten most anterior nuclei, quantified across 11 and 12 embryos for wild-type and *4xbcd*, respectively. (d) Bicoid gradient slopes, represented by decay constant  $\lambda$  scaled to egg length (EL). (e, f) Expression of *even-skipped* (*eve*) (anti-Eve immunostaining, stage 5 embryos). Scale bar = 100  $\mu$ m. (g, h, i) Cuticle phenotypes, with red brackets in (h) highlighting severe defects. (j) Viability to adulthood, with the error bar in G0 representing the standard error of three measurements. (k) Scheme of experimental evolution. (l) Distribution of *eve* stripes positions in mid-stage 5 embryos, detected by *in situ* hybridization. Top, individual populations. Bottom, all populations aggregated (N=60 for Generation 4, N=217 for Generation 8). Intensity represents the scaled density of the designated population. Asterisks indicate shifts in the scaled position between generations. \*\*,  $p < 0.01$ ; \*,  $p < 0.05$  (Wilcoxon test, FDR-adjusted). (m) Distribution of embryo length across generations (grey histogram, all populations aggregated; N=34 for Generation 0, 176 for Generation 4, 217 for Generation 8). Color bars represent the median of each population. Population 0-0-1A, 0-0-2A, and 0-0-3A are non-mutagenized populations representing standing variation in the lab stock. G0 in (j) and (m) represents a non-mutagenized *4xbcd* stock. All boxplots in this work are defined as follows: center line, median; box limits, the first and third quartiles; whiskers, 1.5x interquartile range.

148

149 **Compensation of *bicoid* overexpression through an increase in embryo length**

150 To further address the possible link between embryo size and the *bicoid* network, we  
 151 focused on population 2-6-1A to dissect the developmental changes before and after laboratory  
 152 evolution. In this line, *eve* stripes consistently shifted to the anterior in the 8<sup>th</sup> and the 10<sup>th</sup>  
 153 generation compared to the 4<sup>th</sup> generation (Fig. 2a-c; Fig. S4a), with the shift of the last stripe  
 154 being the most prominent (Fig. 2c-d). We found that the shifts occurred simultaneously with an

155 expansion of the posterior region: the egg length was consistently longer in both generations  
156 ( $540.5 \pm 6.5$   $\mu\text{m}$  at Generation 4,  $573.5 \pm 13.6$   $\mu\text{m}$  at Generation 8, and  $560.4 \pm 7.1$   $\mu\text{m}$  at  
157 Generation 10; **Fig. 2e, Fig. S4b**). The expression of *tailless*, a gap gene that specifies the  
158 posterior identity, was also wider in the 8<sup>th</sup> generation than the 4<sup>th</sup> generation (**Fig. 2f-i**). While  
159 the total number of nuclei along the A-P axis has not significantly changed (**Fig. S4c**), consistent  
160 with early embryos' limited capacity to regulate cell number<sup>27</sup>, there was a slight increase in the  
161 number of nuclei in the posterior region, from *eve* stripe 7 to the posterior pole at Generation 8  
162 ( $12.3 \pm 0.9$  vs.  $14.1 \pm 1.1$ ,  $p = 0.048$ , Wilcoxon test, **Fig. 2j**), as well as an overall increase in the  
163 distance between nuclei ( $6.39 \pm 0.23$   $\mu\text{m}$  vs.  $6.82 \pm 0.13$   $\mu\text{m}$ ,  $p = 0.004$ , Wilcoxon test, **Fig. S4d-**  
164 **e**). Consistent with compensatory changes, the line has stabilized phenotypes across phenotypic  
165 scales, including cuticle phenotypes (**Fig. 2k**) and viability to adulthood after 15-16 generations  
166 (**Fig. 2l**).

167 The compensation via embryo size appeared to be relatively short-term, because the  
168 embryo length of population 2-6-1A peaked at Generation 8 and 10, but gradually reduced after  
169 Generation 15 and resumed wild-type level at Generation 49 (**Fig. S4a-b**). This could be due to  
170 the fact that overly large embryos might have deleterious effects and cannot persist as a long-  
171 term solution in the standard environmental conditions employed in this work. Such a turnover in  
172 adaptive strategies is not uncommon in evolution<sup>28-31</sup>. Future research along these lines could  
173 reveal alternative strategies to compensate for high *bicoid* dosage that is independent of embryo  
174 size, such as the response of Population 1-1-3A, which showed a shortened anterior region (**Fig.**  
175 **1j, Fig. S2**).

176 Together, these data lead us to hypothesize that the compression of the trunk and tail  
177 caused by extra Bicoid might be mitigated in larger embryos due to more space in the posterior  
178 region. These results are consistent with previous findings on the interaction between egg size  
179 and the *bicoid* network<sup>24,32,33</sup>. Furthermore, because egg size is a highly polygenic and evolvable  
180 trait<sup>34-36</sup>, it might have provided a large capacity to respond rapidly to genetic and environmental  
181 changes.

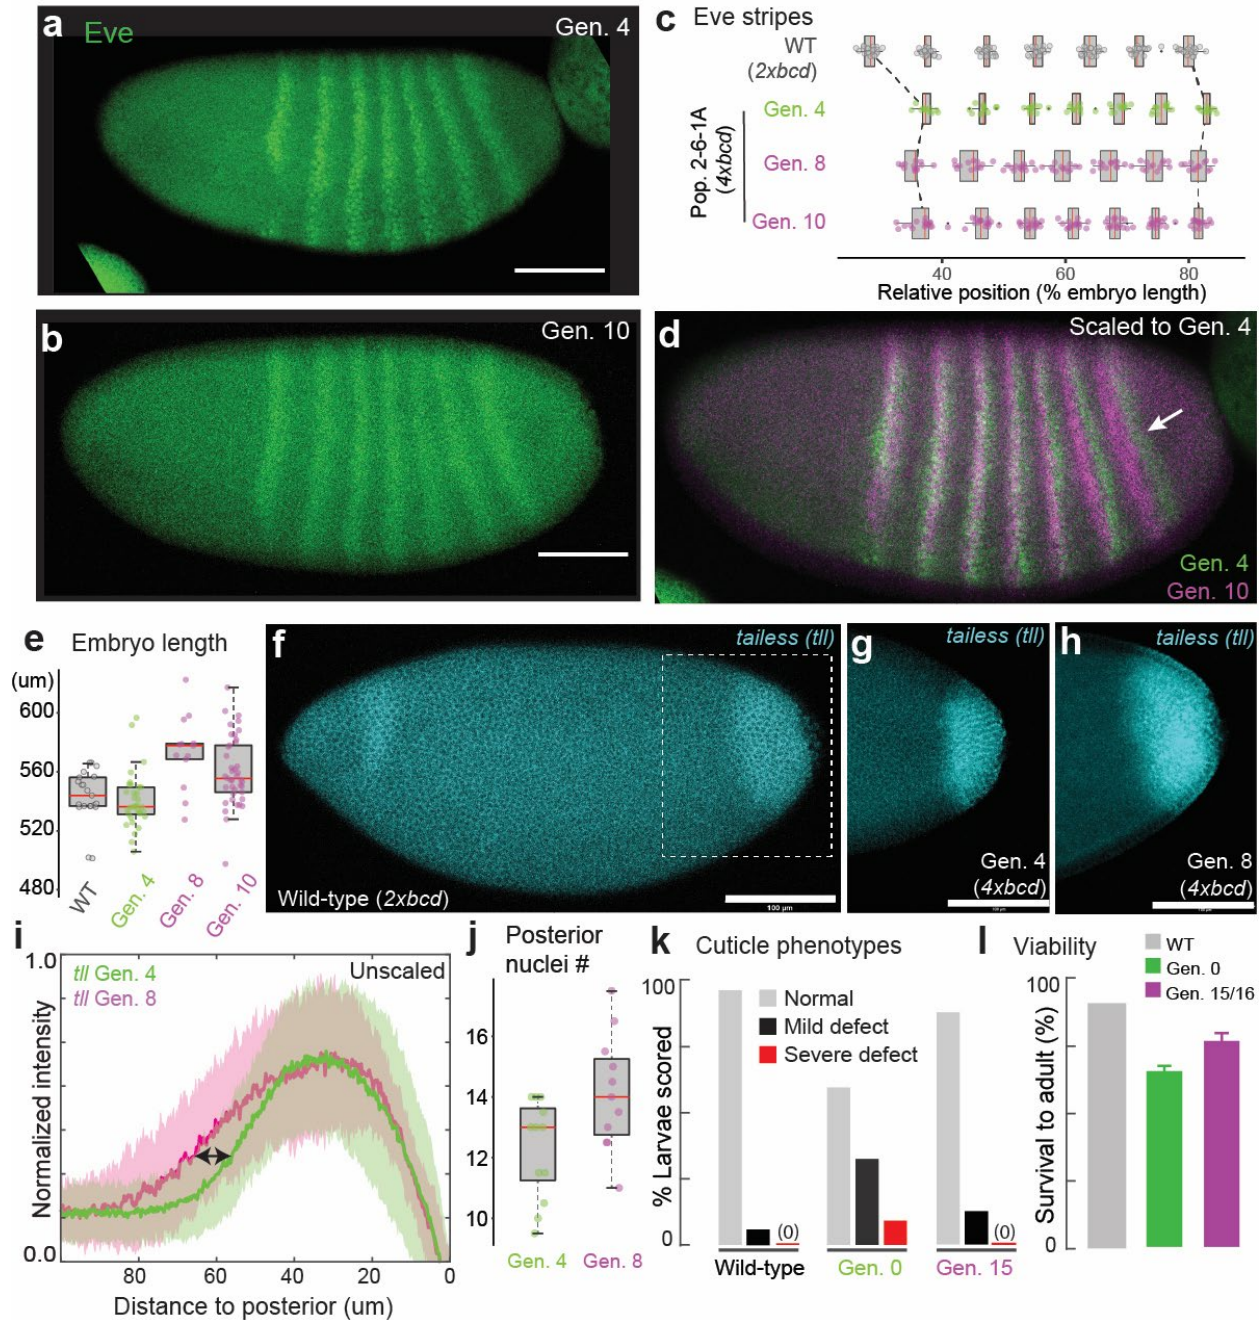

**Fig. 2. Compensatory changes in gene expression, embryo length, cuticle, and viability.**

(a-d) Eve stripes in Population 2-6-1A (anti-Eve staining), with the arrow in (d) showing a prominent anterior shift in the 7<sup>th</sup> stripe. The shifts were quantified in (c) from *in situ* data (*eve* co-stained with *sna*). (e) Increases in embryo length at the 8<sup>th</sup> and 10<sup>th</sup> generation. (f – i) *tailless (tll)* expression, detected by *in situ* hybridization. (i) shows the normalized intensity profiles aligned at the posterior end. Solid lines are average *tll* intensity and the shaded panels denote the standard deviation. N = 22 and 14 for the 4<sup>th</sup> and the 8<sup>th</sup> generation, respectively. (j) The number of nuclei from the posterior boundary of *eve* stripe 7 to the posterior pole. (k) Rescue of cuticle defects. (l) Viability to adult, with error bars representing the standard error of three measurements (also see Fig. S1). Scale bar = 100 um. G0 in (k) and (l) represents a non-mutagenized *4xbcd* stock.

182

183



## 184 **Multi-modal analysis reveals changes in metabolism and ovariole development**

185 To identify possible molecular bases that can support the rapid phenotypic stabilization  
186 through changes in egg length, we performed single-nuclei transcriptomics with early embryos in  
187 the evolved line (2-6-1A, Generation 20) (**Fig. S5, Table S2**). The evolved line had a striking  
188 increase in the proportion of yolk nuclei compared to wild-type or the *4xbcd* lab stock (6% vs.  
189 1%,  $p < 0.001$ , fisher's exact test, **Fig. 3a**), consistent with the increased nutritional need of  
190 larger embryos. Among marker genes of the yolk cluster, there were 230 genes differentially  
191 expressed in the evolved line, including those related to metabolism (*bmm*, *trbl*, *Lime*, *Srr*) and  
192 cell growth (*crp*, *Traf4*) (**Fig. 3b-c**, and **Supplemental Data File 3**). Previous research suggests  
193 that the *Drosophila* body/organ size can be directly controlled by signaling pathways involved in  
194 metabolic regulation and cell growth, such as the insulin signaling pathway<sup>37,38</sup>. We found a  
195 number of metabolic genes differentially expressed in the evolved line across multiple cell types,  
196 including epidermal ('*ovo*'), trunk ('*opa*'), anterior ('*oc*') and posterior ('*byn*') clusters in the  
197 ectoderm, as well as in mesoderm, endoderm, yolk and pole cells (**Fig. 3d, Supplemental Data**  
198 **File 4**).

199 The changes in yolk content and gene expression might imply a broader change in  
200 maternal metabolism to direct more nutrients into the eggs, and thus enable larger embryo sizes.  
201 Indeed, we found that the evolved embryos contained more triglycerides (TG) than two wild-  
202 type lines (**Fig. 3e**). Triglycerides are essential components of yolk-related lipid droplets<sup>39</sup> that  
203 can act as metabolic fuel for *Drosophila* embryogenesis<sup>40</sup>, and high triglyceride levels have been  
204 linked to bigger embryo size in multiple animals<sup>41,42</sup>. To further characterize this metabolic  
205 alteration, we performed MALDI-imaging mass spectrometry (MALDI-IMS) in positive ion  
206 mode<sup>43</sup> on cryo-sectioned slices of ovaries. This technique allowed us to reconstruct entire mass  
207 spectra for single oocytes, and thus trace this phenomenon back to the oocyte stage. We found  
208 differences in the lipid signature of oocytes between the evolved *4xbcd* line (2-6-1A, Generation  
209 42) and wild-type (w1118) (**Fig. S6a**), including elevated levels of triglycerides and decreased  
210 levels of glycerophosphocholines in the evolved line (**Fig. 3f-g, Fig. S6b-c**). Additionally, there  
211 were global differences in the fatty acid (FA) distribution in the evolved line, showing a higher  
212 abundance of FAs with 13, 14, and 15 carbons, and reduced levels of FAs with 18 carbons on  
213 their chain (**Fig. 3g**). This observation was confirmed by tandem mass spectrometry coupled  
214 with MALDI-IMS in negative ion mode, which independently detects a wide range of lipid ions

215 (Fig. S6d-f; also see Methods). Overall, these results show that the line has altered its lipid  
216 metabolism in a way that is consistent with bigger embryo sizes and higher energy requirements.

217 The changes in gene expression and lipid composition suggest rapid physiological  
218 changes at the maternal level. We examined the ovaries of the experimental populations and  
219 found that they tended to have fewer ovarioles ( $12.4 \pm 0.3$  vs.  $14.8 \pm 0.7$ , all populations  
220 aggregated vs. wild-type aggregated, same below) and longer oocytes ( $498.4 \pm 2.9$   $\mu\text{m}$  vs.  $458.0$   
221  $\pm 8.2$   $\mu\text{m}$ ) than wild-type lines (Fig. 3h-j), consistent with a previous report that the egg size  
222 difference between *Drosophila* lines originated from oogenesis<sup>44</sup>. Therefore, the compensation  
223 could occur through a trade-off between ovariole number and oocyte size<sup>45</sup>, possibly through  
224 growth-related mechanisms such as the insulin pathway<sup>34,46</sup>.

225 To further explore this hypothesis, we next tested if the process could be recapitulated  
226 genetically. Consistent with this hypothesis and previous reports<sup>46,47</sup>, we found that  
227 overexpression of the gene *chico*— a key component of the insulin signaling pathway—using the  
228 *nos:GAL4* driver and the Trip-OE system<sup>48</sup>, led to a reduction in oocyte length of  $475.2 \pm 8.0$   $\mu\text{m}$   
229 to  $459.8 \pm 4.8$   $\mu\text{m}$  ( $p = 0.003$ , Wilcoxon test) and reduced levels of triglycerides of  $0.346 \pm 0.027$   
230 nmole/embryo to  $0.125 \pm 0.061$  ( $p = 0.00967$ , two-sided t-test,  $n = 3$ ), demonstrating that oocyte  
231 size could change through such genes in short timescales. Furthermore, we found that the change  
232 in size was specific to oogenesis and likely to have metabolic rather than behavioral  
233 underpinnings because we did not observe significant differences in larval length or larval  
234 feeding behavior (Fig. S7)<sup>36</sup>.

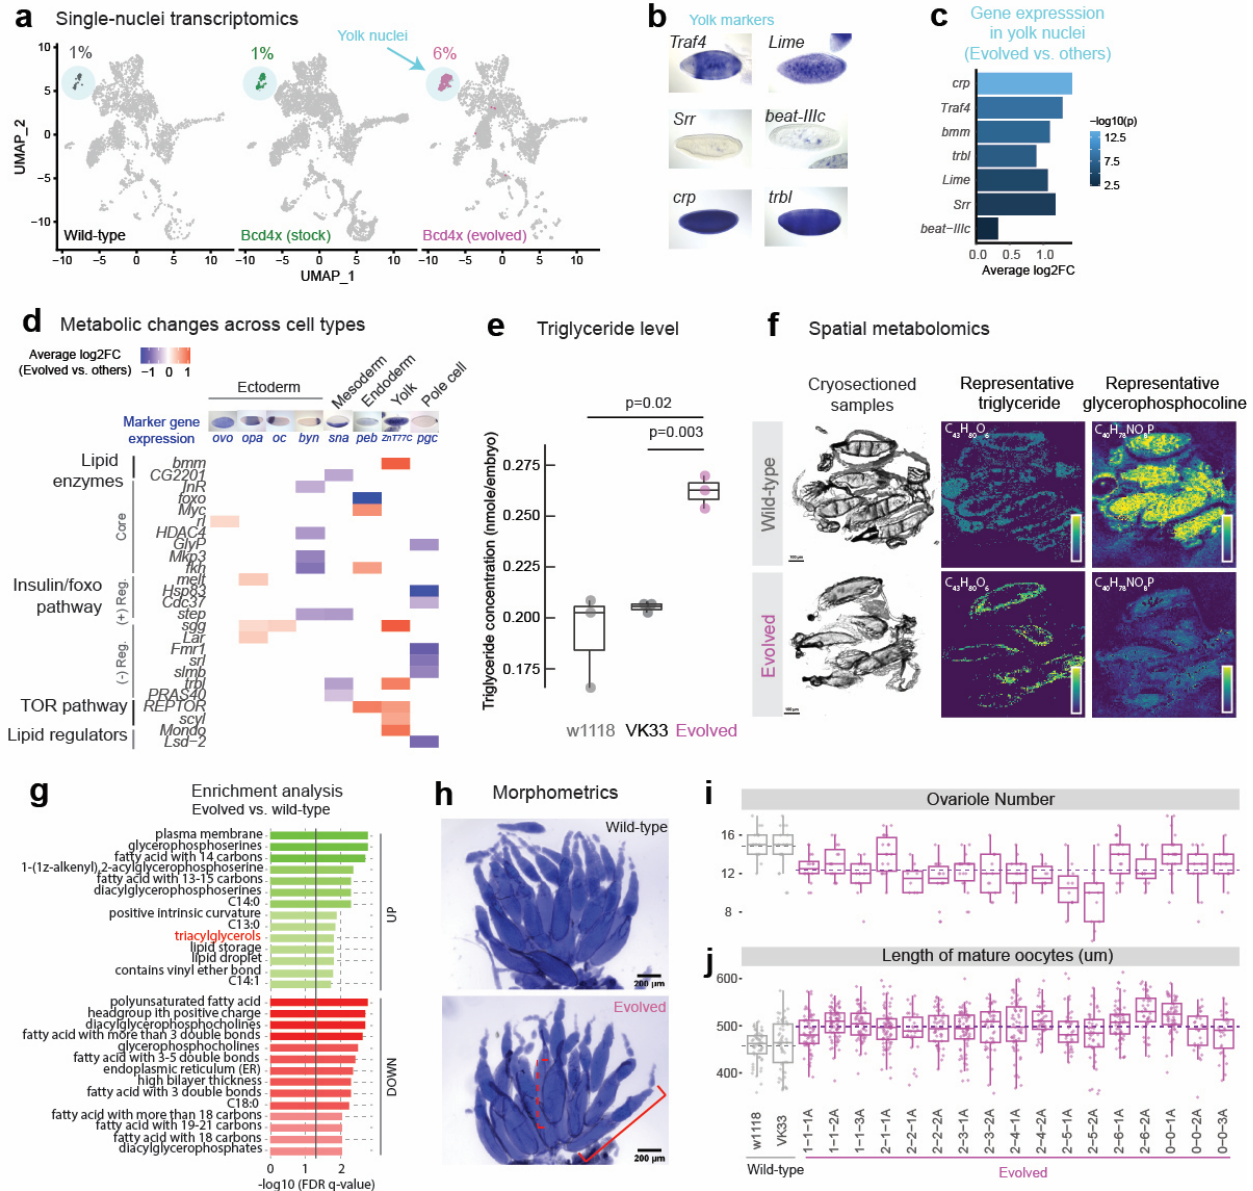

**Fig. 3. Phenotypic changes in gene expression, metabolism and ovariole development in the evolved lines.** (a) UMAP of single-nuclei transcriptomes of stage 5 embryos (see Fig. S6 for details). The colored clusters show yolk nuclei. Wild-type is VK33. The evolved line is population 2-6-1A at Generation 20. (b) Representative marker genes of yolk nuclei. (c) Representative marker genes of yolk nuclei that were differentially expressed in the evolved line. (d) Changes in expression of metabolic genes across cell types between the evolved line and the other two samples. Only significant changes (adjusted p-value < 0.05) are shown. (+) Reg., positive regulators; (-) Reg., negative regulators. FC, fold change. Images of marker gene expression in (b) and (d) are from BDGP *in situ* database<sup>49</sup>. (e) Enzymatic determination of triglyceride levels in stage 5 embryos (Generation 50 for population 2-6-1A). Points represent values from independent homogenates made from 50 embryos each. P values are from Student's t-test. (f) MALDI-IMS of ovaries. Left, middle sections from ovaries employed in MALDI-IMS. Scale bar = 100  $\mu$ m. Middle, spatial distribution of a representative triglyceride, TG(40:1) at  $m/z=715.5846$  normalized by another triglyceride which showed constant levels across all experiments (TG(44:3) at  $m/z=767.6159$ ). Right, spatial distribution of a representative glycerophosphocholine, PC(32:1) at  $m/z=732.5537$ , in the sectioned ovaries. The evolved line is 2-6-1A from Generation 42. (g) Enrichment analysis comparing oocytes from the 2-6-1A and w1118 lines, based on the abundance values for 122 lipids detected through MALDI-IMS (same experiments as f). The vertical solid line indicates a cutoff at FDR q-value of 0.05. Triacylglycerols were highlighted in red. (h) Ovaries

of wild-type (w1118) and evolved (2-6-1A, Generation 39) lines, stained with DAPI. The solid red bracket indicates an ovariole, and the dashed red bracket indicates a mature oocyte. Scale bar = 200  $\mu$ m. (i) Ovariole number and (j) length of mature oocytes of wild-type and the evolved lines (Generation 39). The horizontal dashed lines represent the mean of all wild-type/evolved lines aggregated ( $p = 9.783e-09$  for ovariole number and  $p < 2.2e-16$  for oocyte length, Wilcoxon test).

236

## 237 **Laboratory experiments are consistent with phenotypes from additional fly lines**

238 Embryo size is known to vary widely within and between *Drosophila* species<sup>24</sup> and  
239 across environments<sup>35</sup>. As such, changes in embryo size could provide a way to rapidly mitigate  
240 the effects of Bicoid dose. To test if our observations could be extended, we examined two  
241 inbred lines isolated from the wild, Ind and Canton-S, with the former having larger embryos  
242 than the latter<sup>24</sup> (**Fig. 4a**). The anterior Bicoid concentration was also higher in the larger Ind  
243 embryos (**Fig. 4b-c**), consistent with the relationship between Bicoid and embryo size in our  
244 laboratory-evolved lines, as well as previous results<sup>44,50-52</sup>. These two natural isolates also show  
245 differences in ovariole number and oocyte length (**Fig. 4d**), as well as the level of triglycerides  
246 (**Fig. 4e**). Collectively, these observations suggest that the coupling among the *bicoid* network,  
247 egg size, maternal physiology, and metabolism could also exist in nature.

248 Next, to test if the bigger embryo size of the Ind genetic background could relieve the  
249 stress on the developmental network elicited by Bicoid overexpression, we crossed the *bicoid*  
250 transgenes into these inbred lines. In the crosses, the F1 offspring have 50% of genetic  
251 information from the wild isolates and have two extra copies of *bicoid* inserted on the second and  
252 the third chromosomes, respectively (4*xbcd* in total, see **Fig. S8a** for the crossing scheme). We  
253 also crossed them to a wild-type lab strain (VK33) to control for background effects. We found  
254 that embryos from F1 individuals in Ind/lab background were larger than those in Canton-S/lab  
255 background (**Fig. S8b**), suggesting that the Ind background had a dominant effect on embryo  
256 size. The *eve* stripes in Ind/lab background were located further to the anterior than the Canton-  
257 S/lab background in the control crosses (2*xbcd*) (**Fig. S8c**), suggesting natural variation in the  
258 capacity for scaling of the network. Such variation might be in favor of buffering stresses such as  
259 overexpression of *bicoid* - the difference was also present in embryos with 4*xbcd*, with the *eve*  
260 stripes of Ind embryos being anterior to those of Canton-S embryos, i.e. closer to the wild-type  
261 positions (**Fig. 4f-i**). Interestingly, the positions of *eve* stripes (**Fig. 4i**) and cuticle phenotypes  
262 (**Fig. 4j-l**) of 4*xbcd*-Ind embryos resembled those of population 2-6-1A. 4*xbcd* embryos in the  
263 Ind background also had higher viability to adulthood compared with those in Canton-S or lab

264 background (**Fig. S8d**), consistent with a higher tolerance of *bicoid* overexpression in larger  
 265 embryos. Together, the evolved line is similar to Ind across a number of key phenotypes,  
 266 supporting the hypothesis that changes in maternal contributions to embryo sizes could be used  
 267 to buffer the dosage of *bicoid*.

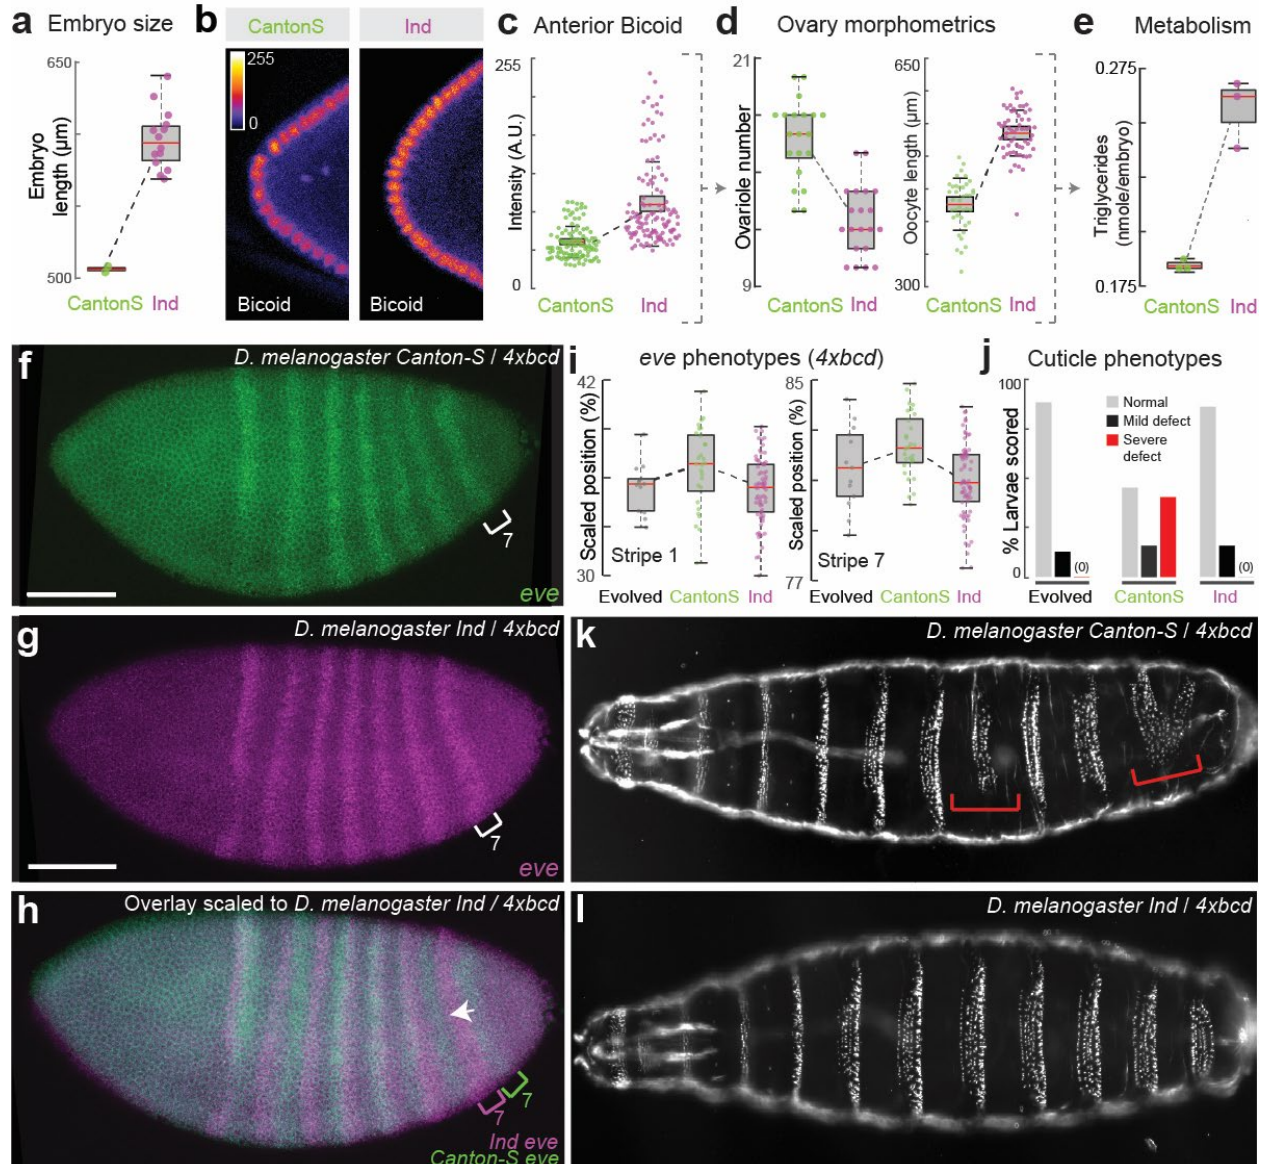

**Fig. 4. Wild populations' responses to extra copies of *bicoid* and model for adaptation.**

(A) Embryo size and (B-C) anterior Bicoid concentration (anti-Bicoid staining) of Ind and Canton-S. Each point represents one nucleus in (C), quantified across 18 and 10 embryos for Ind and Canton-S, respectively. (D) Ovary number, oocyte length, and (E) level of triglycerides per embryo of Ind and Canton-S. (F-I) *eve* stripe positions and (J-L) cuticle phenotypes of Ind and Canton-S when carrying *4xbcd*. Scale bar = 100 μm. The red brackets in (K) highlight severe defects. Data for the evolved line in (I) were from Generation 8. See **Fig. S8** for full data.

269

270 The trends we found from experimental evolution, genetic perturbations, and the findings  
 271 from the larger *D. melanogaster* *Ind* line, are all in line with evidence that *Drosophila* can adapt  
 272 rapidly to laboratory culture on ecological timescales<sup>53</sup>. To explore the broader context of these  
 273 results, we looked across a number of closely related *Drosophila* species (**Fig. 5a, Fig. S9**),  
 274 testing the relationship between ovariole number and oocyte lengths (**Fig. 5b**). Consistent with  
 275 previous results<sup>36,45</sup>, we see a strong correlation across the *Sophohora* subgenus indicating that  
 276 such a trait may be consistent across a broader evolutionary context.  
 277

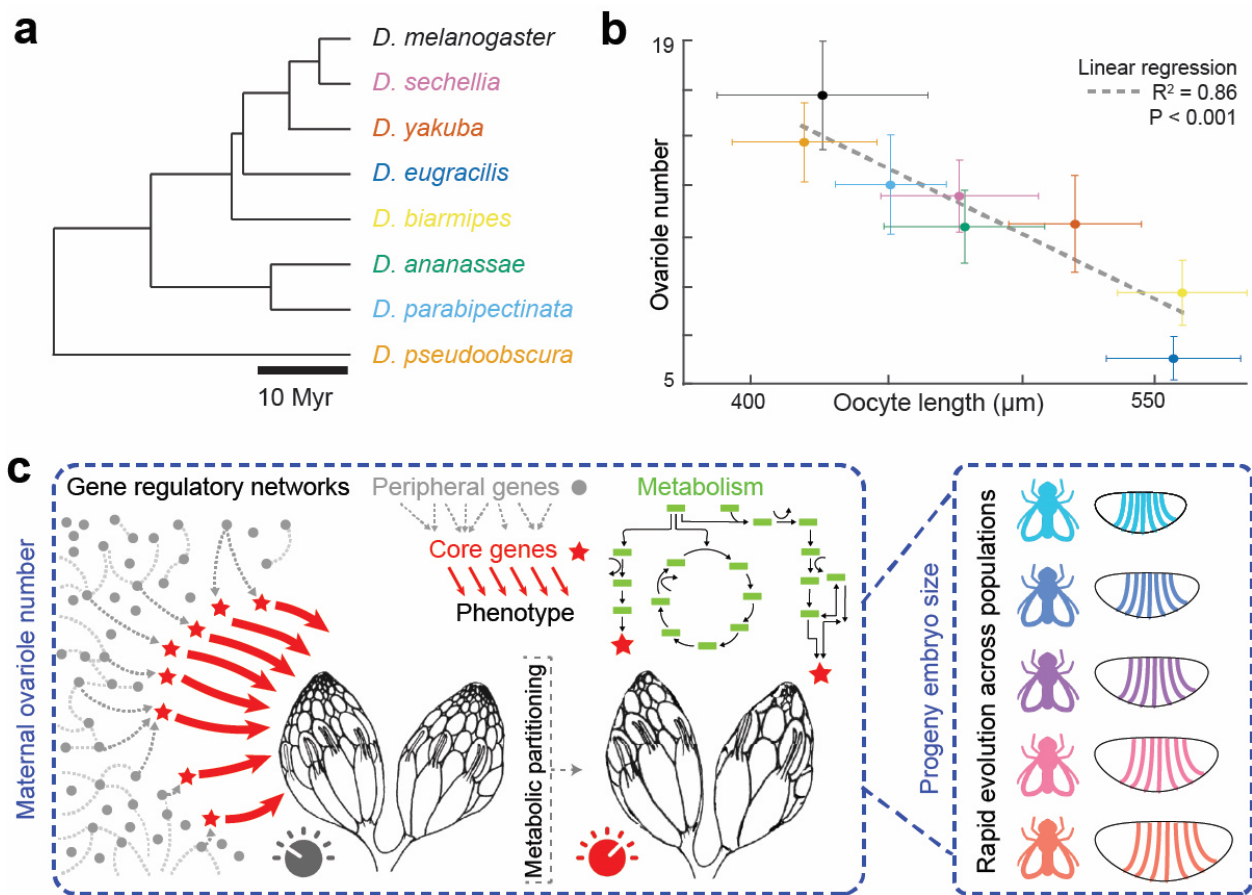

278 **Fig. 5. Laboratory evolution predicts phenotypes of wild species.**  
 279 (a) Phylogeny of species tested<sup>54</sup>. (b) The relationship between ovariole number and oocyte length, error bars  
 denote the standard deviation; colors are indicated in (a). *D. melanogaster* was represented by Canton-S. (c)  
 Model for maternal compensatory changes in laboratory evolution [adapted from Liu et al. (2019)<sup>55</sup>]. The  
 embryonic patterning network is connected to a broad gene regulatory network via core genes (red stars) involved  
 in maternal metabolism that tunes the size of ovarioles.

280

## 281 Discussion

282 Little is known about how organisms respond to developmental perturbations in short  
283 timescales. The early segmentation network downstream of Bicoid has been characterized as a  
284 highly dynamic<sup>56</sup> yet robust network to ensure precise scaling of gap gene boundaries<sup>21,24,50,57</sup>.  
285 Perturbations to the network, such as a change in *bicoid* dosage, can lead to substantial  
286 patterning defects and fitness disadvantages<sup>22</sup> (**Fig. 1**). Leveraging the fitness disadvantage as a  
287 selection pressure provided us an opportunity to examine the robustness and evolvability of  
288 developmental systems. We found compensatory phenotypic changes within 8-15 generations,  
289 reflected in gene expression, larval morphologies, and survival to adulthood (**Fig. 1-2**). These  
290 results are consistent with the recent findings that adaptation in *Drosophila* was evident over  
291 only one to four generations in response to environmental changes, including changes in egg-  
292 size<sup>53</sup>. Such rapid phenotypic adaptation and large allele-frequency shifts over many independent  
293 loci in response to developmental changes may be a common mechanism for gene-regulatory  
294 network evolution<sup>53</sup>.

295 Our results support previous observations that embryonic geometry can affect the scaling  
296 of gap gene boundaries under perturbations<sup>32,33</sup>, demonstrating an inherent link between the  
297 embryonic size-control network and the early segmentation network, as shown in previous  
298 reports<sup>44,51,52</sup>. In particular, we found that the increase in egg length has the most prominent  
299 effect on the posterior region (**Fig. 2**), consistent with a recent study showing that posterior  
300 boundaries in *Drosophila* embryos are highly dynamic and sensitive to gene dosage<sup>58</sup>. These  
301 results are in line with the observed dynamic adjustment by the segmentation gene network<sup>59,60</sup>,  
302 whereby at early developmental stages, initial gap gene expression boundaries are determined by  
303 maternal factors. As development progresses, gap gene products engage in cross-regulation to  
304 integrate positional information<sup>60</sup>. Therefore, integration across the entire segmentation gene  
305 network is needed to reduce the variability of shifting segmentation patterns due to perturbations  
306 of maternal inputs. This work further introduces the role of maternal compensation through  
307 morphological and physiological changes, whereby the system takes advantage of the inherent  
308 plasticity of embryo size<sup>61-63</sup>.

309 The rapid phenotypic compensation driven by embryo size is likely related to its genetic  
310 architecture. Egg size is a trait known to be both highly polygenic<sup>34</sup> and evolvable in both  
311 common garden experiments<sup>33,53</sup> as well as across natural populations<sup>24,35,36</sup>. As such, the egg-  
312 size network might provide a much larger set of targets for selection than targets directly

313 downstream of Bicoid, and hence the change in egg length appeared as the first response in a  
314 short evolutionary timescale. These results are consistent with models that posit that phenotypic  
315 evolution may be driven by many loci of small effect<sup>64,65</sup>. Furthermore, the rapid changes were  
316 associated with changes in ovariole number, which is also known to be controlled by many  
317 genes<sup>26</sup>, resulting in changes in metabolism and embryo size. Therefore, there could be numerous  
318 genes at different phenotypic levels that provide evolutionary accessibility to compensation. It is  
319 possible that the segmentation network, which can readily scale within and between species<sup>21</sup>, is  
320 the result of selection for a highly evolvable system that provides developmental plasticity for  
321 early embryos across variable ecologies<sup>66</sup> (**Fig. 5c**).

322 Our study is subject to a few limitations, highlighting the challenges in longitudinal  
323 studies of laboratory populations. In our experimental-evolution design, we set up multiple  
324 parallel-evolving populations with an intensive sampling schedule with the aim to characterize  
325 network dynamics at scale. However, despite our efforts in high-throughput embryo-handling  
326 and automated imaging<sup>2,67</sup>, we were often limited by technical factors such as sample size, batch  
327 effects, and drift. A higher level of automation would allow systematic examinations of different  
328 adaptive strategies in parallel populations (e.g., compensatory mechanisms other than embryo  
329 size) and exploration of the generalizability of the proposed model. One of the challenges is that  
330 random mutagenesis introduces many mutations that may be both unrelated and highly  
331 deleterious<sup>68</sup>. Further, mapping causal variants, which can be broadly distributed with low-effect  
332 sizes, remains a challenge<sup>69</sup>. Therefore, in the future, more targeted *in vivo* mutagenesis  
333 approaches biased towards gene regulatory networks can be developed for the study of the  
334 genetics and evolution of the *Drosophila* regulatory genome.

335 The phenotypic differences were not limited to early embryonic development but  
336 included changes in lipid metabolism (not only increased yolk content and triglyceride levels, but  
337 also changes in the relative abundance of physiologically relevant phospholipids), cell-type-  
338 specific gene expression (rewiring of metabolic gene network), and maternal anatomy (reduced  
339 ovariole numbers) (**Fig. 3**). These results show that perturbation of one node of the  
340 developmental network, the *bicoid* dosage, can lead to profound organism-wide responses across  
341 multiple phenotypic scales. Importantly, these observations highlight the deep connections  
342 between multiple phenotypic layers of multicellular systems and argue for a broader ‘phenomics’  
343 perspective<sup>16</sup>, instead of a strictly gene-centric view. Exploring the interplay of metabolic and



344 developmental networks could transform our understanding of evolution and development across  
345 variable ecologies<sup>5,15</sup>, as such processes are fundamentally linked<sup>70</sup>. In the future,  
346 synthetic evolution approaches using animal systems could provide a generalizable platform for  
347 the dissection of gene regulation and complex genomes.

348

349

350

## 351 **Methods**

### 352 **Fly genetics**

353 The eGFP-Bicoid fusion construct was designed according to Gregor et al. (2007)<sup>71</sup> (see  
354 **Supplemental data File 5** for the construct map). The construct was synthesized and cloned into  
355 placZattB by Genscript, and was transformed into *D. melanogaster* at the VK18 or VK33  
356 landing site following standard PhiC31 integrase protocol, with the help of injection service  
357 provided by Alessandra Reversi at EMBL. The transformants at the VK33 site were  
358 homozygosed by sibling crosses to construct a stable *4xbcd* line and subsequently used in  
359 mutagenesis and experimental evolution.

360 We also established balancer stocks from the transformants at VK18 (second  
361 chromosome) and VK33 (third chromosome) sites, and used them to generate a *6xbcd* line, with  
362 an extra copy of *bicoid* on each of the second and the third chromosomes.

363 Overexpression of *chico* was done by Trip-OE system<sup>48</sup>. Virgin flies of NGT40>dCas9-  
364 VPR (Bloomington stock #67052; w[\*]; P{w[+mC]=GAL4-nos.NGT}40; P{UAS-3XFLAG-  
365 dCas9-VPR}attp2) were crossed to males of gRNA lines, targeting sequences near transcription  
366 start sites of candidate genes. *chico*: #76114, y[1] sc[\*] v[1] sev[21]; P{y[+t7.7]  
367 v[+t1.8]=TOE.GS00909}attP40/CyO. Non-targeting control (QUAS): #67539, y[1] sc[\*] v[1]  
368 sev[21]; P{y[+t7.7] v[+t1.8]=GS00089}attP40). Non-CyO F1 females were dissected for  
369 ovariole analysis.

370 To examine the response to extra copies of *bicoid* in wild populations, virgins of Ind  
371 (“Mysore” strain, old stock #3114.4 from National Drosophila Species Stock Center, US) and  
372 Canton S (Bloomington stock #64349) were crossed to *6xbcd* males. The F1 flies are  
373 heterozygous for the alleles from the wild populations and carry two extra copies of *bicoid*. They  
374 were used to set up egg-collection chambers and the F2 embryos were examined for *eve*

375 expression, cuticle phenotypes, and fitness (**Fig. S8a**). To control for background effects, the  
376 natural isolates were crossed to the VK33 stock, which has the same background as the *6xbcd*  
377 line.

378 At Generation 40, we outcrossed 2-6-1A males to wild-type w1118 or VK33 for four  
379 generations. In each generation, males with orange eyes (heterozygous for the *egfp-bicoid*  
380 transgene) were crossed to virgins of w1118 or VK33. After four generations, males and virgins  
381 with orange eyes were mated, and their progeny were selected for homozygotes (red eyes) to  
382 create ‘new’ *4xbcd* lines. In this way, we expect to remove or ‘dilute’ 2-6-1A-associated  
383 mutations and study the effects of *4xbcd* without any compensatory evolution.

384 The non-*melanogaster* species were a generous gift from Nicolas Gompel, with the  
385 exceptions of *Drosophila parabiepectinata* which was kindly provided by Artyom Kopp, and  
386 *Drosophila virilis*, which was kindly provided by Eileen Furlong. Strain background: *D.*  
387 *ananassae* (TSC 14024-0371.13), *D. biarmipes* (TSC 14023-0361.01), *D. eugracilis* (from the  
388 US National *Drosophila* Species Stock Center), *D. parabiepectinata* (inbred derivative of strain  
389 TSC 14024-0401.02), *D. pseudoobscura* (TSC 14011-0121-94 USA), *D. sechellia* (TSC 14021-  
390 0248-25), *D. yakuba* (TSC 14021-0261.01) and *D. virilis* (*w*).

391

## 392 **Mutagenesis and experimental evolution**

393 EMS-mutagenesis was performed according to Bökel (2008)<sup>72</sup>. Briefly, around 1,000  
394 *4xbcd* male flies (G0) were fed with 1% sucrose solution containing 25mM EMS, and were then  
395 mated to *4xbcd* virgins. Around 3,500 F1 flies were used to establish 7 independent mutant  
396 pools, with 400-600 flies per pool. Specifically, the mutagenesis was done in two batches: flies  
397 from the first batch were used to establish one mutant pool, labeled 1-1, and flies from the  
398 second batch were used to establish six mutant pools, labeled 2-1 to 2-6. Mutation rate did not  
399 obviously differ between the two batches based on subsequent genomic analysis (see below).

400 Each mutant pool was used to seed 2-3 bottles of progenies consecutively (‘set A’) and  
401 these bottles were replicated at the 3<sup>rd</sup> generation (‘set B’), to provide 4-6 replicate populations in  
402 total for each mutant pool (**Fig. S1a**). For example, Pool 1-1 was used as parents to produce  
403 Populations 1-1-1A, 1-1-2A and 1-1-3A, by transferring the parents to a new bottle every 4-5  
404 days. F3 flies from these populations were used as parents to produce Populations 1-1-1B, 1-1-  
405 2B, and 1-1-3B, respectively. Populations in set B were primarily for backups in this study.

406 The flies were maintained at 25°C under standard fly-rearing condition under non-  
407 overlapping generations, to select for rescuing mutations. The population size was approximately  
408 200-500 for each generation. Three populations of non-mutagenized *4xbcd* flies were maintained  
409 under the same condition for comparison (labeled 0-0-1A, 0-0-2A and 0-0-3A). During the first  
410 15 generations, the populations were sampled every 2-5 generations for embryo collection, and  
411 the adult flies were frozen for genomic DNA (**Fig. S1b**).

412

### 413 **Embryo fixation, antibody staining and fluorescent *in situ* hybridization**

414 *Drosophila* embryos were fixed and stained following standard protocols<sup>73</sup>. In particular,  
415 stage-5 embryos were acquired from a 5-hr egg-laying window at room temperature. A fixation  
416 time of 18 min was used for these embryos, to adapt to the sensitivity of Eve antibody. The Eve  
417 antibody (mouse, Developmental Studies Hybridoma Bank, 2B8-concentrate) was used at 1:20  
418 dilution. Bicoid antibody (rabbit) was a gift from Pinar Onal and Stephen Small, and was used at  
419 1:250. DIG-, FITC- or biotin-labeled, antisense RNA-probes were used to detect gene expression  
420 of *eve*, *sna*, or *tll*, respectively. All embryos were mounted in ProLong Gold with DAPI, and  
421 imaged on a Zeiss LSM 880 confocal microscope, under 20x (air, 0.8 NA) or 25x (oil, 0.8 NA)  
422 objective.

423

### 424 **Image analysis**

425 All images were rotated to orient along the A-P axis before analysis, with the A-P axis  
426 positioned horizontally and the dorsal-ventral (D-V) axis positioned vertically (see **Fig. S2d** for  
427 an example).

428 **Position of *eve* stripes.** Images from fluorescent *in situ* hybridization of *eve*, *snail* (*sna*) and  
429 *tailless* (*tll*) were used to quantify *eve* position precisely. Embryos were imaged as Z-stacks, with  
430 the measurements performed on the Z-slice where *eve* and *sna* were in focus. We manually  
431 extracted the positions of the intersection of *sna* expression and the anterior boundary of each  
432 *eve* stripe in mid-stage 5 embryos (see **Fig. S2d** for an example), staged based on the degree of  
433 membrane invagination. The use of *sna* to mark a particular dorsal-ventral position on the *eve*  
434 stripes enabled precise quantification of the *eve* positions, which could also explain the  
435 differences between our results on Ind and Canton-S and a previous publication<sup>24</sup>.

436 **Embryo length.** Embryo length was manually extracted from Z-stacked confocal images, from  
437 anterior to posterior, excluding the pole cells.

438 **Bicoid concentration.** Bicoid intensities were acquired from anti-Bicoid staining by extracting  
439 the average nuclear intensity for ten nuclei at the anterior pole for each embryo, as per Dubuis et  
440 al. (2013)<sup>74</sup>.

441 **Slope of Bicoid gradient.** Bicoid intensity along the A-P axis was measured at the depth of mid-  
442 embryo, by sliding a rectangle (smaller than a nucleus) along the edge of the embryo, from  
443 anterior to posterior<sup>20</sup>. The shape of Bicoid gradient is described by the length constant  $\lambda$ <sup>57</sup>. The  
444 log-transformed, unscaled intensities between 10% to 50% egg length were fitted to a linear  
445 model, and the slope ( $k$ ) from the linear model was used to calculate  $\lambda$ :  $\lambda = -\frac{1}{k}$ .

446 **Tll profiles.** The intensity profiles were extracted from a rectangular region of 3-4 cells' height  
447 along the A-P axis from max-projected confocal images<sup>75</sup>, normalized to peak intensities. The  
448 dorsal-ventral position was determined using the border of *sna* expression.

449 **Nuclei counts.** The number of nuclei along the A-P axis was counted along the *sna* border  
450 independently by two experimenters (X.C.L and L.G.), on one Z-slice where *eve* and *sna* were in  
451 focus. In the posterior region where *sna* is not expressed, we counted the nuclei along the  
452 extension line of the *sna* border all the way until the posterior end (excluding the pole cells). The  
453 counts from the two experimenters were not significantly different. Numbers from the two  
454 experimenters were averaged for each embryo. Particularly, the total number of nuclei (left panel  
455 in **Fig. S4c**) were averaged across two measurements by X.C.L. and one measurement by L.G,  
456 whereas the nuclei in the most anterior and most posterior regions (middle and right panels in  
457 **Fig. S4c**) were only counted once by each experimenter.

458 **Nuclei distance.** While counting the nuclei (see above), we marked the center of each nucleus  
459 and extracted their x-y coordinates in ImageJ, in order to calculate the 2D-distance between  
460 neighboring nuclei along the A-P axis:  $D = \sqrt{(x_1 - x_2)^2 + (y_1 - y_2)^2}$ , where  $x_1$  and  $x_2$   
461 represent the x coordinates of two neighboring nuclei and  $y_1$  and  $y_2$  represent the y coordinates of  
462 them. The average inter-nucleus distance was calculated using all nuclei counted along the A-P  
463 axis and across two experimenters' measurements for each embryo (**Fig. S4d**). Additionally, we  
464 plotted the inter-nucleus distance ( $D$ ) as a function of the nucleus position ( $x_2$ ) along the A-P axis  
465 (**Fig. S4e**), which showed that the difference between F4 and F8 embryos was mainly in the  
466 anterior and middle regions of the embryos.

467

## 468 **Cuticle preparation**

469           Overnight embryos were collected, bleached, rinsed and transferred into clean water in a  
470 petri dish, where they were allowed to develop for 24h at room temperature. After 24h, the  
471 larvae were transferred onto a glass slide and mounted in Hoyer's medium. The slides were  
472 baked in an oven at 55°C for 48h and were then imaged with dark field microscopy.

473           The cuticle images were scored based on the criteria from Namba et al. (1997)<sup>22</sup>: severe  
474 defect – fusion or missing segments; mild defect – missing or misaligned denticles in any  
475 segment; normal – no visible defects. w1118 was used as wild-type.

476

## 477 **Survival assay**

478           Around 100 embryos from an overnight plate were manually transferred onto an apple  
479 juice plate with yeast in the center, and left at room temperature for 24h. On the second day, the  
480 number of unhatched embryos were counted for each plate, and the entire agar (with larvae and  
481 unhatched embryos) was transferred to a food vial. The eclosed adults were counted from day 12  
482 until no adults came out. All the survival assays were performed at room temperature.

483

## 484 **Whole-genome sequencing**

### 485 ***Genomic DNA extraction and library preparation***

486           We sequenced 20 F1 flies individually to estimate the level of genetic variation in the  
487 founding populations (1-4 flies from each mutant pool). To prepare genomic DNA from F1  
488 individuals, each fly was squished and incubated at 37 °C for 30 min in Squish Buffer (10 mM  
489 Tris pH 8.0, 1 mM EDTA, 25 mM NaCl, 0.15 mg/ml Proteinase K), followed by a clean-up with  
490 a Genomic DNA Clean & Concentrator kit (Zymo Research). The DNA was tagmented with a  
491 customized Tn5 protocol and sequenced in 75 bp (maximum 92 bp) paired-end on an Illumina  
492 NextSeq 500 at EMBL GeneCore.

493           Genomic DNA from the evolved populations was prepared using a Qiagen DNeasy  
494 Tissue Kit protocol (from Alexey Veraksa), with around 100 frozen flies (about 400 ul packed  
495 flies) per population. There are 38 samples: 18 populations × 2 generations (F3, F7) and 1 focal  
496 population (2-6-1A) × 2 additional generations (F9, F15). They were tagmented as described

497 above and sequenced in 50 bp (maximum 88 bp) single-end on an Illumina NextSeq 2000, with a  
498 pooling strategy intentionally biased toward higher coverage of 2-6-1A samples.

#### 499 ***Read mapping and variant calling***

500 The reads were aligned to the dm6 genome with `Bowtie2`<sup>76</sup>, and duplicated reads were  
501 removed with `Picard` tools. To rule out Wolbachia infection, we aligned the reads to a  
502 Wolbachia reference genome (wMelPop, GCF\_00475015.1), and found 0.0 % of reads aligned in  
503 all samples. After pre-processing, we acquired a total of 89.5 million reads for the 20 F1  
504 individuals. As a preliminary analysis, we called variants in F1 individuals with `FreeBayes`<sup>77</sup>,  
505 with a threshold of 30 for mapping quality and 20 for base quality, on sites with a minimum  
506 coverage of 4. We found 375,779 variable positions among F1 individuals (variant quality  
507 score >10 and allele frequency < 1), suggesting a substantial amount of variation in the starting  
508 populations.

509 For pooled-sequencing (Pool-seq) of evolved populations, we obtained an average of 5  
510 million reads for each non-focal sample, and an average of 16 million reads for 2-6-1A samples  
511 after pre-processing. Data from F1 individuals were computationally pooled. Together our reads  
512 cover 36.6% of the genome. Despite the shallow coverage, we regard each read to be randomly  
513 sampled from the population and the allele frequency may be roughly represented by the ratio of  
514 allele depth (AD). To extract this information, we used a pipeline adapted for Pool-seq data<sup>34,78</sup>:  
515 first, we realigned the reads around indels and performed base recalibration with `GATK4`, using  
516 the list of known variants in F1. Variable sites were then identified with `bcftools mpileup` and  
517 `bcftools call`, with allele depth (AD) extracted for each sample. 936,533 positions are found  
518 variable among the samples (variant quality score >10 and allele frequency < 1). The variants  
519 were then annotated with `ANNOVAR`<sup>79</sup>.

520 Unfortunately, the shallow coverage did not allow us to confidently detect EMS-induced  
521 mutations in the population data. For the non-focal populations, there were 18-56 variants private  
522 to each mutant pool (at sites with sufficient coverage), and there were 1,663 private variants for  
523 pool 2-6, which is likely associated with the high coverage on population 2-6-1A. Therefore, we  
524 focused on common variants among the populations in the genomic analysis.

525 The NGS reads are deposited at ArrayExpress (EMBL-EBI) under experiment no. E-  
526 MTAB-11768.

#### 527 ***Estimation of EMS mutation rate***

528 We used the freebayes calls from the twenty F1 individuals to estimate the mutation rate  
529 induced by EMS treatment. To estimate the mutation rate, we needed to apply more stringent  
530 filters to remove background mutations. We first removed indels and sites with missing data in  
531 more than two individuals. Furthermore, we only kept sites with a mean depth between 4 and 50,  
532 and all genotypes with a depth outside this range were considered missing data. We then used  
533 `bcftools +prune` to remove small linkage blocks (sites with  $r^2$  higher than 0.6 within a 1kb  
534 window), which were likely to be background variation. After these filters, there were 13,292  
535 SNPs in the dataset. We then identified SNPs that were only present in one individual (minor  
536 allele count = 1), with a requirement of at least 3 reads supporting the observed allele (AO or  
537 RO >2). In this way, we identified 1,036 mutations across 19 mutagenized individuals (on  
538 average 55 mutations per individual) and 7 private SNPs in one non-mutagenized individual.  
539 Normalized to the number of bases covered in each individual (with the same quality and depth  
540 filter as when applying freebayes), the estimated mutation rate was on average 2.7 mutations per  
541 Mb, ranging from 0.9 to 5.4 mutations per Mb among individuals (**Fig. S1c**). The mutation rate  
542 was not obviously different between the two mutagenesis batches. Based on these data, we  
543 estimated the total number of novel mutations introduced to our experimental populations to be  
544  $2.7 \times 180\text{Mb} \times 3500 \text{ individuals} = 1,701,000$  mutations.

#### 545 *Changes in allele frequency of common variants*

546 For each population, we used `bcftools +ad-bias` to apply fisher's exact test to compare  
547 allele ratio between F3 and F7, with requirements on the minimum alternative allele depth (2)  
548 and minimum depth (10). Out of the 450,739 biallelic sites tested, 54,045 (12%) sites show  
549 significant changes in allele frequency between generations in at least one population (FDR-  
550 adjusted  $p < 0.05$ ). The changes in allele frequency span a wide range, with most changes being  
551 transitions between homozygous and heterozygous states (**Fig. S3a**), which is probably  
552 associated with the detection limit imposed by sequencing depth (mean depth is 29 and median  
553 depth is 21 for the sites surveyed, **Fig. S3b**).

554 Since fisher's exact test might be an overly relaxed test on allele frequency and could  
555 lead to false positives<sup>34,80</sup>, we applied a sign test<sup>81</sup> to narrow down the list of variants to those  
556 showing recurrent changes in multiple populations. Each variant is given a score:  $S = N_{\text{REF increase}} - N_{\text{REF decrease}}$ , where  $N_{\text{REF increase}}$  is the number of populations showing a significant increase in  
557 reference allele frequency and  $N_{\text{REF decrease}}$  is the number of populations showing a significant  
558

559 decrease in reference allele frequency. Therefore, the  $S$  score represents the tendency for the  
560 alternative allele to be purged (if  $S > 0$ ) or fixed (if  $S < 0$ ) during evolution. Out of the 450,739  
561 biallelic sites tested, 16,394 sites (4%) showed consistent increases or decreases in allele  
562 frequency in more than one population. The mean of  $S$  among these sites is 0.56, suggesting a  
563 slight systematic bias for detecting decreases in alternative allele frequency, but the majority of  
564 the changes among populations are in random directions (mean  $S$  is close to 0). By using a cutoff  
565 of  $S > 5$  or  $S < -5$ , we report on the top 1% sites (181 among 16,394) that show consistent  
566 directional changes across the parallel-evolving populations.

### 567 ***Genotype-phenotype association***

568 Due to the low coverage and small sample size, we used genotype calls instead of allele  
569 frequency to perform genotype-phenotype association. We restricted this analysis to sites with a  
570 minimum mean depth of 10, leaving 261,167 sites in the dataset. We used the mean length of F4,  
571 F8, F10, and F17 embryos as the phenotype, to associate with the ‘population genotypes’ of their  
572 parent generation (F3, F7, F9, and F15). Note that we used the length of F17 embryos as the  
573 phenotype of F15 population, due to missing data in F16. For each variant, a linear model is used  
574 to estimate the effect size and significance of the genotype. For variants with three genotypes  
575 (“0/0”, “0/1” and “1/1”), the smaller p-value is used. Due to the small sample size (30 samples at  
576 most), we don’t think that the association analysis has enough statistical power to support any  
577 variant to be an interesting candidate, but the results could be used as a reference to prioritize  
578 variants detected by the sign test (e.g. the intronic G>T mutation in *CG1136* in **Fig. S3e**). The p-  
579 values are included in **Supplemental Data File 2**.

580

### 581 **Single-nuclei transcriptomics**

582 2.5h-to-3.5h-old embryos (developed at room temperature) were dechorionated and flash-  
583 frozen in liquid nitrogen for nuclei preparation. The evolved embryos are from population 2-6-  
584 1A, at the 20<sup>th</sup> generation. They were manually examined, and smaller embryos were removed  
585 upon collection, to reduce noise and focus on relatively large embryos. A wild-type line (VK33)  
586 and the *4xbcd* lab stock were treated in parallel.

587 Nuclei isolation was performed following a standard protocol (10x Genomics® Single  
588 Cell Protocols, with adaptations from Francisca Hervas-Sotomayor at Heidelberg University).  
589 The frozen embryos were squished with a pestle for 20 times in cold homogenisation buffer



590 (HB) [250 mM sucrose, 25 mM KCl, 5 mM MgCl<sub>2</sub>, 10 mM Tris-HCl (pH 8), 0.1% Nonidet  
591 P40/IGEPAL, 1 uM DTT, 0.4 U/ul RNase Inhibitor (New England Biolabs), 0.2 U/ul  
592 SUPERase•In™ RNase Inhibitor (Invitrogen)]. The samples were then centrifuged at 100 g for 1  
593 min to remove unlysed tissue, and the supernatant was centrifuged at 1,000 g for 5 min to pellet  
594 the nuclei. The pellet was washed once in HB, filtered twice with Flowmi® Cell Strainers  
595 (Sigma), and resuspended in PBS. A subsample of the nuclei prep was DAPI-stained and  
596 examined under the microscope, to determine the density of nuclei. For each sample, 7,500  
597 nuclei were used as the input for 10x library construction. RNA-seq was performed on an  
598 Illumina NextSeq 500 at EMBL Genomic Core Facilities (GeneCore) in two runs.

599 The reads were mapped to the *Drosophila* reference genome (dm6) plus the eGFP-Bicoid  
600 plasmid sequence and counted with Cell Ranger (6.0.1), with intronic reads included. The count  
601 data were analyzed with Seurat (3.9.9.9010)<sup>82</sup> in R, with the three samples merged into one data  
602 frame. They were first filtered to remove 1) nuclei with extremely low (< 200) or high (> 4,000)  
603 number of expressed genes and 2) nuclei with a high percentage of mitochondrial reads (> 5%).  
604 The resulting data were normalized and scored for cell cycle status. The data were then scaled,  
605 with the percentage of mitochondrial reads, percentage of ribosomal reads, and cell cycle status  
606 regressed out. The scaled data were used for PCA, and Harmony<sup>83</sup> was used to correct for batch  
607 effect, with 30 PCs. A preliminary clustering was done on the corrected data with 30 PCs and  
608 three clusters with predominantly cytosolic RNA (high percentage of ribosomal and  
609 mitochondrial RNA, low count in the number of genes and number of molecules) were removed.

610 After the removal, there are 3k to 6k nuclei for each sample. The data were normalized,  
611 scaled, ‘harmonized’ and clustered again as described above, with 30 PCs. There are 21 clusters,  
612 with no obvious cluster of doublets based on scores generated by scrublet<sup>84</sup>. Cell types were  
613 inferred based on marker genes<sup>85</sup>, and 11 clusters were identified as early embryonic cell types  
614 based on marker gene expression at stage 4-6 (*in situ* database of Berkeley Drosophila Genome  
615 Project<sup>49</sup>) (**Table S2**). Differentially expressed genes were identified with FindMarkers in  
616 Seurat.

617 To curate a set of growth-related genes to examine expression changes across cell types,  
618 we used the definition of insulin-like receptor signaling pathway in FlyBase (Gene group  
619 FBgg0000910). Other genes were curated from Choi et al. (2015)<sup>86</sup>, Welte (2015)<sup>39</sup>, Heier and  
620 Kühnlein (2018)<sup>87</sup>, and Heier et al. (2021)<sup>88</sup>.

621 The snRNA-seq reads are deposited at ArrayExpress (EMBL-EBI) under experiment no.  
622 E-MTAB-12068.

623

#### 624 **Triglycerides quantification assay**

625 The concentration of TGs in embryos was measured using the Triglyceride  
626 Quantification Colorimetric Kit from Sigma (Cat. #MAK266). 50 stage5 embryos were  
627 homogenized in Eppendorf tubes on a Nonidet P40 Substitute (Sigma, Cat. #74385) 5% solution.  
628 The triglycerides concentration in each homogenate was then quantified following the  
629 instructions provided by the manufacturer. Absorbance was measured at 570 nm.

630

#### 631 **MALDI-imaging mass spectrometry on sectioned ovaries**

632 Ovaries needed to be cryo-sectioned to prepare the tissue for MALDI-IMS. Briefly, a  
633 small number of ovaries were embedded in a previously heated 5% m/v carboxymethylcellulose  
634 (Sigma) solution. This solution then solidifies at room temperature, and the resulting molds were  
635 sectioned in a Leica CM1950 cryostat at -20°C, producing slices with a thickness of 20 µm.  
636 These slices were then mounted on regular glass slides.

637 The samples were then coated with a microcrystalline matrix of 2,5-dihydroxybenzoic  
638 acid dissolved in 70% acetonitrile to 15 mg/ml, with the help of a TM-Sprayer robotic sprayer  
639 (HTX Technologies, Carrboro, NC, USA). The sprayer operated at a spray temperature of 80°C,  
640 flow rate of 0.01 ml/min, track spacing of 3 mm and 10 passes, and the estimated surface  
641 concentration was 3µg/mm<sup>2</sup>. The glass slides were then mounted onto a custom adaptor and  
642 loaded into the MS imaging ion source (AP-SMALDI5, TransMIT GmbH, Giessen, Germany).  
643 Generated ions were co-axially transferred to a high mass-resolution mass spectrometer  
644 (QExactive Plus mass spectrometer, ThermoFisher Scientific). Intact lipid imaging was  
645 performed in positive ion mode with an isolation mass range of 400-1200. Supplementary fatty  
646 acid analysis was done in negative ion mode with an isolation range of 400-1000, fragmentation  
647 energy of 45 (NCE) and product isolation between 160-320.

648 Metabolite annotation was performed using the METASPACE cloud software<sup>89</sup> with  
649 SwissLipids database<sup>90</sup> (version 2018-02-02). The Principal Component Analysis of these results  
650 was performed on R using the FactoMineR and factoextra packages (<http://factominer.free.fr/>).  
651 Enrichment analysis were carried out using LION/web<sup>91</sup>.

652

### 653 **Dissection of ovarioles**

654 Flies were reared in uncrowded cages with apple juice plates supplied with yeast paste for  
655 48h prior to dissection. 10-12 female flies were dissected for ovaries, which were kept on ice in  
656 PBT with 4% PFA until all samples were processed. The ovaries were then fixed in PBT/PFA  
657 for 30 min, washed twice in PBT and placed in Prolong Gold with DAPI. They were then further  
658 dissected to separate the ovarioles and mounted on glass slides. The slides were imaged on a  
659 Zeiss 880 confocal microscope and scored for ovariole number and oocyte length.

660

### 661 **Larval behavior**

662 Larvae (3<sup>rd</sup> instar, 5 days after egg laying) were harvested from food vials using a 10%  
663 glucose solution and placed on agar plates, where their movement was recorded using a FL3-U3-  
664 13Y3M-C CMOS camera (<https://www.flir.de/products/flea3-usb3/>) for two minutes. Then,  
665 positional information as a function of time was automatically extracted from the videos for each  
666 individual larvae using FIMtrack<sup>92</sup>. Behavior-related parameters (speed, bending, etc) were then  
667 calculated using this dataset.

668

### 669 **Data availability**

670 The WGS and snRNA-seq reads were deposited at ArrayExpress (EMBL-EBI) under  
671 experiments E-MTAB-11768 and E-MTAB-12068, respectively. All data supporting the findings  
672 of this study are available within the paper and its Supplementary Information files.

673

### 674 **Code availability**

675 Custom R codes and source data are deposited at: [https://git.embl.de/xuli/rapid-response-](https://git.embl.de/xuli/rapid-response-of-fly-populations-to-gene-dosage-across-development-and-generations)  
676 [of-fly-populations-to-gene-dosage-across-development-and-generations](https://git.embl.de/xuli/rapid-response-of-fly-populations-to-gene-dosage-across-development-and-generations).

677

### 678 **Acknowledgements**

679 We thank Phillip Oel, Leslie Pan, Nikolaos Papadopoulos, Blanca Pijuan-Sala and Xuefei Yuan  
680 for their help and advice in single-nuclei transcriptomics. We thank Ching-Ho Chang and Luisa  
681 Pallares for advice on genomic analysis. We thank Dimitri Kromm and Lars Hufnagel for their  
682 help in light-sheet imaging. We thank Pinar Onal and Stephen Small for sharing the Bicoid

683 antibody, and Nicolas Gompel, Artyom Kopp, and Eileen Furlong for sharing *Drosophila* stocks.  
684 We also thank Martijn Molenaar for discussions on the interpretation of the metabolomics data.  
685 We thank Pinar Onal and members of the Crocker group for their input on the project, in  
686 particular Natalia Misunou, Mindy Liu Perkins, Albert Tsai, Rafael Galupa, Noa Otilie Borst,  
687 and Gilberto Alvarez Canales for providing feedback on the manuscript. Matthew A. Benton,  
688 Claire Standley and Xitong Liang also provided feedback on the manuscript. X.C.L. and L.G. are  
689 supported by fellowships from the European Molecular Biology Laboratory Interdisciplinary  
690 Postdoc Programme (EIPD) under Marie Skłodowska-Curie Actions COFUND (664726 and  
691 847543, respectively). Research in the Crocker lab is supported by the European Molecular  
692 Biology Laboratory (EMBL).

693

#### 694 **Author contributions**

695 Conceptualization: X.C.L, L.G., J.C. Investigation: X.C.L., L.G., M.E., K.R., J.C. Methodology:  
696 X.C.L., L.G., M.E., T.A., J.C. Formal analysis: X.C.L., L.G., J.C. Data curation: X.C.L., L.G.,  
697 J.C. Visualization: X.C.L., L.G., J.C. Software: X.C.L., L.G., J.C. Resources: T.A. Supervision:  
698 T.A., J.C. Project administration: X.C.L., J.C. Funding acquisition: J.C. Writing, original draft:  
699 X.C.L., L.G., J.C. Writing, review & editing: X.C.L., L.G., M.E., K.R., T.A., J.C.

700

#### 701 **Competing interests**

702 The authors declare no competing interests.

703

#### 704 **Supplementary Materials**

705 **Fig. S1.** Mutagenesis, experimental evolution and sampling scheme.

706 **Fig. S2.** Response of different populations.

707 **Fig. S3.** Changes in allele frequency in evolved populations.

708 **Fig. S4.** Embryonic phenotypes of the evolved line 2-6-1A.

709 **Fig. S5.** Single-nuclei transcriptomes of the evolved line 2-6-1A.

710 **Fig. S6.** Metabolic alterations in oocytes from the evolved line 2-6-1A.

711 **Fig. S7.** Quantification of crawling behavior of 3<sup>rd</sup>-instar larvae from 2-min videos.

712 **Fig. S8.** Cross *bicoid* transgenes into Ind and Canton-S.

713 **Fig. S9.** Ovaries in different *Drosophila* species.

714 **Table S1.** Viability of stocks carrying 2x-to-6x-*bicoid* (prior to selection).

715 **Table S2.** Marker genes and cell types for clusters in single nuclei RNA-seq.

716 **Supplemental Data File 1 (video).** Light-sheet imaging of eGFP-tagged Bicoid throughout  
717 embryonic development of 4x*bcd* embryos.

718 **Supplemental Data File 2 (Microsoft Excel format).** Variants with recurrent changes across  
719 multiple populations between Generation 3 and 7.

720 **Supplemental Data File 3 (Microsoft Excel format).** Marker genes of yolk cluster that are  
721 differentially expressed in the evolved line.

722 **Supplemental Data File 4 (Microsoft Excel format).** Differentially expressed genes between  
723 the evolved line and the other two samples.

724 **Supplemental Data File 5 (Microsoft Word format).** Map of eGFP-Bicoid construct used to  
725 generate the 4x*bcd* line in this study.

726

## 727 **Reference**

- 728 1. Wittkopp, P. J. & Kalay, G. Cis-regulatory elements: Molecular mechanisms and  
729 evolutionary processes underlying divergence. *Nat. Rev. Genet.* **13**, 59–69 (2012).
- 730 2. Fuqua, T. *et al.* Dense and pleiotropic regulatory information in a developmental enhancer.  
731 *Nature* **587**, 235–239 (2020).
- 732 3. Davies, J. Using synthetic biology to explore principles of development. *Dev. Camb.* **144**,  
733 1146–1158 (2017).
- 734 4. Davidson, E. H. *The Regulatory Genome: Gene Regulatory Networks In Development And*  
735 *Evolution - Eric H. Davidson - Google Books. The Regulatory Genome: Gene Regulatory*  
736 *Networks In Development And Evolution* (Academic Press, 2010).
- 737 5. Miyazawa, H. & Aulehla, A. Revisiting the role of metabolism during development.  
738 *Development* **145**, (2018).
- 739 6. Gilbert, S. F., Bosch, T. C. G. & Ledón-Rettig, C. Eco-Evo-Devo: developmental symbiosis  
740 and developmental plasticity as evolutionary agents. *Nat. Rev. Genet.* **16**, 611–622 (2015).

- 741 7. Bergelson, J., Kreitman, M., Petrov, D. A., Sanchez, A. & Tikhonov, M. Functional biology  
742 in its natural context: a search for emergent simplicity. *eLife* **10**, 1–12 (2021).
- 743 8. Weber, M. *Philosophy of Developmental Biology*. (Cambridge University Press, Cambridge,  
744 2022). doi:10.1017/9781108954181.
- 745 9. Jacob, F. *The Possible and the Actual*. (University of Washington Press, 1982).
- 746 10. Boyle, E. A., Li, Y. I. & Pritchard, J. K. An Expanded View of Complex Traits: From  
747 Polygenic to Omnigenic. *Cell* **169**, 1177–1186 (2017).
- 748 11. Frankel, N. *et al.* Morphological evolution caused by many subtle-effect substitutions in  
749 regulatory DNA. *Nature* **474**, 598–603 (2011).
- 750 12. Wood, A. R. *et al.* Defining the role of common variation in the genomic and biological  
751 architecture of adult human height. *Nat. Genet.* **46**, 1173 (2014).
- 752 13. Yengo, L. *et al.* Meta-analysis of genome-wide association studies for height and body mass  
753 index in ~700000 individuals of European ancestry. *Hum. Mol. Genet.* **27**, 3641–3649  
754 (2018).
- 755 14. Houle, D., Govindaraju, D. R. & Omholt, S. Phenomics: the next challenge. *Nat. Rev. Genet.*  
756 **11**, 855–866 (2010).
- 757 15. Perkins, M. L., Gandara, L. & Crocker, J. A synthetic synthesis to explore animal evolution  
758 and development. *Philos. Trans. R. Soc. B Biol. Sci.* **377**, 20200517 (2022).
- 759 16. Gandara, L. *et al.* Developmental phenomics suggests that H3K4 monomethylation catalyzed  
760 by Trr functions as a phenotypic capacitor. *bioRxiv* 2022.03.15.484407 (2022)  
761 doi:10.1101/2022.03.15.484407.
- 762 17. Nüsslein-Volhard, C. & Wieschaus, E. Mutations affecting segment number and polarity in  
763 *Drosophila*. *Nature* **287**, 795–801 (1980).

- 764 18. Briscoe, J. & Small, S. Morphogen rules: design principles of gradient-mediated embryo  
765 patterning. *Development* **142**, 3996–4009 (2015).
- 766 19. Driever, W. & Nüsslein-Volhard, C. The bicoid protein determines position in the  
767 *Drosophila* embryo in a concentration-dependent manner. *Cell* **54**, 95–104 (1988).
- 768 20. Houchmandzadeh, B., Wieschaus, E. & Leibler, S. Establishment of developmental precision  
769 and proportions in the early *Drosophila* embryo. *Nature* **415**, 798–802 (2002).
- 770 21. Gregor, T., Bialek, W., De Ruyter Van Steveninck, R. R., Tank, D. W. & Wieschaus, E. F.  
771 Diffusion and scaling during early embryonic pattern formation. *Proc. Natl. Acad. Sci. U. S.*  
772 *A.* **102**, 18403–18407 (2005).
- 773 22. Namba, R., Pazdera, T. M., Cerrone, R. L. & Minden, J. S. *Drosophila* embryonic pattern  
774 repair: How embryos respond to bicoid dosage alteration. *Development* **124**, 1393–1403  
775 (1997).
- 776 23. Berleth, T. *et al.* The role of localization of bicoid RNA in organizing the anterior pattern of  
777 the *Drosophila* embryo. *EMBO J.* **7**, 1749–56 (1988).
- 778 24. Lott, S. E., Kreitman, M., Palsson, A., Alekseeva, E. & Ludwig, M. Z. Canalization of  
779 segmentation and its evolution in *Drosophila*. *Proc. Natl. Acad. Sci.* **104**, 10926–10931  
780 (2007).
- 781 25. Teleman, A. A., Chen, Y. W. & Cohen, S. M. *Drosophila* melted modulates FOXO and TOR  
782 activity. *Dev. Cell* **9**, 271–281 (2005).
- 783 26. Lobell, A. S., Kaspari, R. R., Serrano Negron, Y. L. & Harbison, S. T. The genetic  
784 architecture of Ovariole number in *Drosophila melanogaster*: Genes with major, quantitative,  
785 and pleiotropic effects. *G3 Genes Genomes Genet.* **7**, 2391–2403 (2017).

- 786 27. Busturia, A. & Lawrence, P. A. Regulation of cell number in *Drosophila*. *Nature* **370**, 561–  
787 563 (1994).
- 788 28. Lenski, R. E. Experimental evolution and the dynamics of adaptation and genome evolution  
789 in microbial populations. *ISME J.* **11**, 2181–2194 (2017).
- 790 29. Good, B. H., McDonald, M. J., Barrick, J. E., Lenski, R. E. & Desai, M. M. The dynamics of  
791 molecular evolution over 60,000 generations. *Nature* **551**, 45–50 (2017).
- 792 30. Levy, S. F. *et al.* Quantitative evolutionary dynamics using high-resolution lineage tracking.  
793 *Nature* **519**, 181–186 (2015).
- 794 31. Moulana, A. *et al.* Compensatory epistasis maintains ACE2 affinity in SARS-CoV-2  
795 Omicron BA.1. *Nat. Commun.* **13**, 7011 (2022).
- 796 32. Huang, A., Rupprecht, J.-F. & Saunders, T. E. Embryonic geometry underlies phenotypic  
797 variation in decanalized conditions. *eLife* **9**, 1–21 (2020).
- 798 33. Miles, C. M. *et al.* ARTIFICIAL SELECTION ON EGG SIZE PERTURBS EARLY  
799 PATTERN FORMATION IN *DROSOPHILA MELANOGASTER*. *Evolution* **65**, 33–42  
800 (2011).
- 801 34. Jha, A. R. *et al.* Whole-genome resequencing of experimental populations reveals polygenic  
802 basis of egg-size variation in *drosophila melanogaster*. *Mol. Biol. Evol.* **32**, 2616–2632  
803 (2015).
- 804 35. Azevedo, R. B. R., French, V. & Partridge, L. Thermal Evolution of Egg Size in *Drosophila*  
805 *melanogaster*. *Evolution* **50**, 2338 (1996).
- 806 36. Church, S. H., Donoughe, S., de Medeiros, B. A. S. & Extavour, C. G. Insect egg size and  
807 shape evolve with ecology but not developmental rate. *Nature* **571**, 58–62 (2019).



- 808 37. Böhni, R. *et al.* Autonomous Control of Cell and Organ Size by CHICO, a Drosophila  
809 Homolog of Vertebrate IRS1–4. *Cell* **97**, 865–875 (1999).
- 810 38. Oldham, S. *et al.* The Drosophila insulin/IGF receptor controls growth and size by  
811 modulating PtdInsP3 levels. *Development* **129**, 4103–4109 (2002).
- 812 39. Welte, M. A. As the fat flies: The dynamic lipid droplets of Drosophila embryos. *Biochim.*  
813 *Biophys. Acta BBA - Mol. Cell Biol. Lipids* **1851**, 1156–1185 (2015).
- 814 40. Tennessen, J. M. *et al.* Coordinated Metabolic Transitions During Drosophila  
815 Embryogenesis and the Onset of Aerobic Glycolysis. *G3 GenesGenomesGenetics* **4**, 839–  
816 850 (2014).
- 817 41. Němec, V. Quantitative changes in protein, glycogen and fat content in the eggs of the  
818 locusts, *Locusta migratoria migratorioides* and *Schistocerca gregaria* (Orthoptera), during  
819 embryogenesis. *Eur. J. Entomol.* **99**, 557–559 (2002).
- 820 42. Mensch, J., Di Battista, C., De Majo, M. S., Campos, R. E. & Fischer, S. Increased size and  
821 energy reserves in diapausing eggs of temperate *Aedes aegypti* populations. *J. Insect*  
822 *Physiol.* **131**, (2021).
- 823 43. Caprioli, R. M., Farmer, T. B. & Gile, J. Molecular imaging of biological samples:  
824 localization of peptides and proteins using MALDI-TOF MS. *Anal. Chem.* **69**, 4751–4760  
825 (1997).
- 826 44. He, F. *et al.* Fundamental origins and limits for scaling a maternal morphogen gradient. *Nat.*  
827 *Commun.* **6**, 6679 (2015).
- 828 45. Church, S. H., de Medeiros, B. A. S., Donoughe, S., Márquez Reyes, N. L. & Extavour, C.  
829 G. Repeated loss of variation in insect ovary morphology highlights the role of development  
830 in life-history evolution. *Proc. R. Soc. B Biol. Sci.* **288**, 20210150 (2021).

- 831 46. Green, D. A. Developmental and Genetic Mechanisms of Ovariole Number Evolution in  
832 *Drosophila*. (Harvard University, 2014).
- 833 47. Tu, M.-P. & Tatar, M. Juvenile diet restriction and the aging and reproduction of adult  
834 *Drosophila melanogaster*. *Aging Cell* **2**, 327–333 (2003).
- 835 48. Zirin, J. *et al.* Large-Scale Transgenic *Drosophila* Resource Collections for Loss- and Gain-  
836 of-Function Studies. *Genetics* **214**, 755–767 (2020).
- 837 49. Hammonds, A. S. *et al.* Spatial expression of transcription factors in *Drosophila* embryonic  
838 organ development. *Genome Biol.* **14**, R140 (2013).
- 839 50. Cheung, D., Miles, C., Kreitman, M. & Ma, J. Adaptation of the length scale and amplitude  
840 of the Bicoid gradient profile to achieve robust patterning in abnormally large *Drosophila*  
841 *melanogaster* embryos. *Development* **141**, 124–135 (2014).
- 842 51. He, F. *et al.* Probing Intrinsic Properties of a Robust Morphogen Gradient in *Drosophila*.  
843 *Dev. Cell* **15**, 558–567 (2008).
- 844 52. Cheung, D., Miles, C., Kreitman, M. & Ma, J. Scaling of the Bicoid morphogen gradient by  
845 a volume-dependent production rate. *Development* **138**, 2741–2749 (2011).
- 846 53. Rudman, S. M. *et al.* Direct observation of adaptive tracking on ecological time scales in  
847 *Drosophila*. *Science* **375**, (2022).
- 848 54. Suvorov, A. *et al.* Widespread introgression across a phylogeny of 155 *Drosophila* genomes.  
849 *Curr. Biol.* **32**, 111-123.e5 (2022).
- 850 55. Liu, X., Li, Y. I. & Pritchard, J. K. Trans Effects on Gene Expression Can Drive Omnigenic  
851 Inheritance. *Cell* **177**, 1022-1034.e6 (2019).
- 852 56. Bothma, J. P. *et al.* Dynamic regulation of *eve* stripe 2 expression reveals transcriptional  
853 bursts in living *Drosophila* embryos. *Proc. Natl. Acad. Sci. U. S. A.* **111**, 10598–603 (2014).

- 854 57. Cheung, D. & Ma, J. Probing the impact of temperature on molecular events in a  
855 developmental system. *Sci. Rep.* **5**, 13124 (2015).
- 856 58. Clark, E., Battistara, M. & Benton, M. A. A timer gene network is spatially regulated by the  
857 terminal system in the *Drosophila* embryo. *eLife* **11**, 2022.01.26.477848 (2022).
- 858 59. Grossniklaus, U., Cadigan, K. M. & Gehring, W. J. Three maternal coordinate systems  
859 cooperate in the patterning of the *Drosophila* head. *Development* **120**, 3155–3171 (1994).
- 860 60. Liu, F., Morrison, A. H. & Gregor, T. Dynamic interpretation of maternal inputs by the  
861 *Drosophila* segmentation gene network. *Proc. Natl. Acad. Sci.* **110**, 6724–6729 (2013).
- 862 61. Green, D. A. & Extavour, C. G. Insulin signalling underlies both plasticity and divergence of  
863 a reproductive trait in *Drosophila*. *Proc. Biol. Sci.* **281**, 20132673 (2014).
- 864 62. Hodin, J. & Riddiford, L. M. DIFFERENT MECHANISMS UNDERLIE PHENOTYPIC  
865 PLASTICITY AND INTERSPECIFIC VARIATION FOR A REPRODUCTIVE  
866 CHARACTER IN DROSOPHILIDS (INSECTA: DIPTERA). *Evolution* **54**, 1638–1653  
867 (2000).
- 868 63. Sarikaya, D. P. *et al.* The roles of cell size and cell number in determining ovariole number  
869 in *Drosophila*. *Dev. Biol.* **363**, 279–289 (2012).
- 870 64. Rockman, M. V. The QTN Program and the Alleles That Matter for Evolution: All That’s  
871 Gold Does Not Glitter. *Evolution* **66**, 1–17 (2012).
- 872 65. Zhang, W., Reeves, G. R. & Tautz, D. Testing Implications of the Omnigenic Model for the  
873 Genetic Analysis of Loci Identified through Genome-wide Association. *Curr. Biol.* **31**, 1092-  
874 1098.e6 (2021).
- 875 66. Moczek, A. P. *et al.* The role of developmental plasticity in evolutionary innovation. *Proc.*  
876 *R. Soc. B Biol. Sci.* **278**, 2705–2713 (2011).

- 877 67. Fuqua, T. *et al.* An open-source semi-automated robotics pipeline for embryo  
878 immunohistochemistry. *Sci. Rep.* **11**, 1–16 (2021).
- 879 68. Keightley, P. D. Nature of Deleterious Mutation Load in *Drosophila*. *Genetics* **144**, 1993–  
880 1999 (1996).
- 881 69. Schaid, D. J., Chen, W. & Larson, N. B. From genome-wide associations to candidate causal  
882 variants by statistical fine-mapping. *Nat. Rev. Genet.* **19**, 491–504 (2018).
- 883 70. White, C. R., Alton, L. A., Bywater, C. L., Lombardi, E. J. & Marshall, D. J. Metabolic  
884 scaling is the product of life-history optimization. *Science* **377**, 834–839 (2022).
- 885 71. Gregor, T., Wieschaus, E. F., McGregor, A. P., Bialek, W. & Tank, D. W. Stability and  
886 Nuclear Dynamics of the Bicoid Morphogen Gradient. *Cell* **130**, 141–152 (2007).
- 887 72. Bökel, C. EMS Screens. in *Methods in molecular biology (Clifton, N.J.)* vol. 420 119–138  
888 (2008).
- 889 73. Galupa, R. *et al.* Enhancer architecture and chromatin accessibility constrain phenotypic  
890 space during development. *bioRxiv* **38**, 2022.06.02.494376 (2022).
- 891 74. Dubuis, J. O., Samanta, R. & Gregor, T. Accurate measurements of dynamics and  
892 reproducibility in small genetic networks. *Mol. Syst. Biol.* **9**, 639 (2013).
- 893 75. Crocker, J., Ilsley, G. R. & Stern, D. L. Quantitatively predictable control of *Drosophila*  
894 transcriptional enhancers in vivo with engineered transcription factors. *Nat. Genet.* **48**, 292–  
895 298 (2016).
- 896 76. Langmead, B. & Salzberg, S. L. Fast gapped-read alignment with Bowtie 2. *Nat Methods* **9**,  
897 357–359 (2012).
- 898 77. Garrison, E. & Marth, G. Haplotype-based variant detection from short-read sequencing.  
899 *arXiv* 1207.3907 (2012) doi:10.48550/arxiv.1207.3907.

- 900 78. Schlötterer, C., Tobler, R., Kofler, R. & Nolte, V. Sequencing pools of individuals-mining  
901 genome-wide polymorphism data without big funding. *Nat. Rev. Genet.* **15**, 749–763 (2014).
- 902 79. Wang, K., Li, M. & Hakonarson, H. ANNOVAR: functional annotation of genetic variants  
903 from high-throughput sequencing data. *Nucleic Acids Res.* **38**, e164–e164 (2010).
- 904 80. Turner, T. L., Stewart, A. D., Fields, A. T., Rice, W. R. & Tarone, A. M. Population-based  
905 resequencing of experimentally evolved populations reveals the genetic basis of body size  
906 variation in *Drosophila melanogaster*. *PLoS Genet.* **7**, (2011).
- 907 81. Orr, H. The population genetics of adaptation: the distribution of factors fixed during  
908 adaptive evolution. *Evolution* **52**, 935–949 (1998).
- 909 82. Stuart, T. *et al.* Comprehensive Integration of Single-Cell Data. *Cell* **177**, 1888-1902.e21  
910 (2019).
- 911 83. Korsunsky, I. *et al.* Fast, sensitive and accurate integration of single-cell data with Harmony.  
912 *Nat. Methods* **16**, 1289–1296 (2019).
- 913 84. Wolock, S. L., Lopez, R. & Klein, A. M. Scrublet: Computational Identification of Cell  
914 Doublets in Single-Cell Transcriptomic Data. *Cell Syst.* **8**, 281-291.e9 (2019).
- 915 85. Karaïskos, N. *et al.* The *Drosophila* embryo at single-cell transcriptome resolution. *Science*  
916 **358**, 194–199 (2017).
- 917 86. Choi, S., Lim, D.-S. & Chung, J. Feeding and Fasting Signals Converge on the LKB1-SIK3  
918 Pathway to Regulate Lipid Metabolism in *Drosophila*. *PLOS Genet.* **11**, e1005263 (2015).
- 919 87. Heier, C. & Kühnlein, R. P. Triacylglycerol metabolism in *drosophila melanogaster*.  
920 *Genetics* **210**, 1163–1184 (2018).

- 921 88. Heier, C., Klishch, S., Stilbytska, O., Semaiuk, U. & Lushchak, O. The *Drosophila* model to  
922 interrogate triacylglycerol biology. *Biochim. Biophys. Acta - Mol. Cell Biol. Lipids* **1866**,  
923 158924 (2021).
- 924 89. Alexandrov, T. *et al.* METASPACE: A community-populated knowledge base of spatial  
925 metabolomes in health and disease. *bioRxiv* 539478 (2019) doi:10.1101/539478.
- 926 90. Aimo, L. *et al.* The SwissLipids knowledgebase for lipid biology. *Bioinformatics* **31**, 2860–  
927 2866 (2015).
- 928 91. Molenaar, M. R. *et al.* LION/web: a web-based ontology enrichment tool for lipidomic data  
929 analysis. *GigaScience* **8**, giz061 (2019).
- 930 92. Risse, B., Berh, D., Otto, N., Klämbt, C. & Jiang, X. FIMTrack: An open source tracking  
931 and locomotion analysis software for small animals. *PLOS Comput. Biol.* **13**, e1005530  
932 (2017).
- 933
