# 1 Laboratory evolution of flies to morphogen dosage via rapid 2 maternal changes reveals predictable outcomes

3

4 **Authors:** Xueying C. Li<sup>1,\*</sup>, Lautaro Gandara<sup>1</sup>, Måns Ekelöf<sup>1</sup>, Kerstin Richter<sup>1</sup>, Theodore  
5 Alexandrov<sup>1,2,3</sup>, and Justin Crocker<sup>1,\*</sup>

6 <sup>1</sup> European Molecular Biology Laboratory (EMBL), Heidelberg, Germany

7 <sup>2</sup> Molecular Medicine Partnership Unit between EMBL and Heidelberg University, Heidelberg, Germany

8 <sup>3</sup> BioInnovation Institute, Copenhagen, Denmark

9 \* Corresponding authors: X.C.L., [xueying.li@embl.de](mailto:xueying.li@embl.de), J.C., [justin.crocker@embl.de](mailto:justin.crocker@embl.de)

10

11

12 *“The world was to me a secret which I desired to devine.”*

13 — *Mary Shelley, Frankenstein*

14

## 15 **Abstract:**

16 It remains unknown how developmental systems evolve in response to variable genetic and  
17 environmental conditions. Here, we have examined the evolvability of the classic *bicoid* network  
18 in *Drosophila*, which is essential for anterior-posterior patterning in the early embryo. This  
19 network can be synthetically perturbed by increasing the dosage of *bicoid*, which causes a  
20 posterior shift of the network’s regulatory outputs and a decrease in fitness. To directly monitor  
21 network evolution across populations with extra copies of *bicoid*, we performed genome-wide  
22 EMS mutagenesis, followed by experimental evolution. After only 8-15 generations, evolved  
23 populations have normalized patterns of gene expression and increased survival. Using a  
24 phenomics approach, we find that populations normalized through rapid increases in embryo size  
25 driven by maternal changes in metabolism and ovariole development. We extend our results to  
26 wild populations of flies, demonstrating strong predictability. Together, our results necessitate a  
27 broader view of regulatory network evolution at the systems level. This study highlights the  
28 power of synthetic evolution using animal systems, a generalizable platform for the dissection of  
29 gene regulation and complex genomes.

30

31

## 32 **Introduction**

33           Changes in gene regulation underlie much of phenotypic evolution (Wittkopp and Kalay,  
34 2012). However, our understanding of regulatory evolution is likely biased (Fuqua et al., 2020),  
35 as most evidence is derived from observations of sparse natural variation or limited experimental  
36 perturbations (Davies, 2017), especially in a developmental context. Furthermore, developmental  
37 networks orchestrate multiple processes that span a range of organizational scales—from single  
38 cells to tissues and organs and to even entire organisms (Davidson, 2010). These complex  
39 regulatory programs also integrate metabolic states (Miyazawa and Aulehla, 2018) and  
40 environmental cues in response to complex ecologies (Bergelson et al., 2021; Gilbert et al.,  
41 2015). However, developmental networks are often explored using a reductionist approach,  
42 focusing on particular time windows or pathways of development (Weber, 2022). While such  
43 approaches have been foundational to our understanding of development, this narrow focus may  
44 have limited our understanding of other ‘possible’ paths of regulatory evolution that are not  
45 taken in nature (Jacob, 1982). A more unbiased view might teach us about the constraints that  
46 govern evolutionary trajectories.

47           Quantitative genomics further challenges our models of how regulatory networks  
48 function—for complex traits, most of the heritability is likely due to a large number of variants,  
49 each with a small effect size (Boyle et al., 2017). Thousands of individual genes may contribute  
50 to phenotypes through expression in relevant cells (Boyle et al., 2017), and the contributions of  
51 each genetic variant to developmental fates are often small and challenging to measure (Frankel  
52 et al., 2011; Wood et al., 2014; Yengo et al., 2018). Therefore, it is essential to consider  
53 regulatory evolution and development both at the systems level and across populations (Gandara  
54 et al., 2022; Houle et al., 2010; Perkins et al., 2022). Clearly, approaches to elicit the  
55 relationships between different phenotypic layers and how these changes manifest across  
56 populations are needed to understand the evolution of developmental regulatory networks.

57           Laboratory evolution is a powerful method to gain insights into the mechanisms of  
58 molecular evolution and phenotypic adaptation. Such approaches have explored changes that  
59 accumulate in microbial populations during long-term selection experiments in response to  
60 specific growth conditions (Barrick et al., 2009), leading to insights into genomic, metabolic, and  
61 enzyme evolution (Bershtein and Tawfik, 2008; Dragosits and Mattanovich, 2013; Lenski et al.,  
62 2003; Levy et al., 2015; Sandberg et al., 2019). Combined with recent progress in genomics and

63 phenotyping techniques in multicellular organisms, it has become a powerful approach to  
64 measuring the robustness and evolvability of developmental networks (Miles et al., 2011) and  
65 patterns of genomic changes underlying adaptation (Mallard et al., 2018; Rudman et al., 2022).  
66 Importantly, laboratory “evo-devo” could combine controlled experimental conditions and  
67 precise genetic perturbations in the context of a complete developmental system to understand  
68 possible evolutionary trajectories without requiring *a priori* knowledge.

69 In this study, we leverage the power of laboratory evolution in flies (Engstrom, 1971;  
70 Payne, 1920) to explore the well-characterized early embryonic segmentation network in  
71 *Drosophila* (Nüsslein-Volhard and Wieschaus, 1980) in response to extra copies of *bicoid*, a key  
72 morphogen in *Drosophila* embryonic development. We were able to directly monitor  
73 developmental changes that rescue or mitigate the phenotypic defects caused by altered gene  
74 expression and, in some cases, to even generate novel phenotypes. Examining parallel-evolving  
75 populations with high temporal resolution allowed us to address the predictability of  
76 developmental evolution, whereas multi-modal phenotypic analyses provided mechanistic detail  
77 of the phenotypic changes. We found that compensatory changes for developmental perturbation  
78 can evolve rapidly in the lab, with extensive phenotypic changes in gene expression, metabolism  
79 and maternal anatomical features. Finally, we suggest that patterns observed in laboratory  
80 evolution can recapitulate phenotypic diversity in nature.

81

## 82 **Rapid evolutionary responses to extra copies of *bicoid***

83 The *bicoid* network in *Drosophila melanogaster* is one of the best-understood  
84 developmental networks (Briscoe and Small, 2015). Bicoid is a transcription factor, the mRNA  
85 of which is maternally deposited at the anterior of the egg and forms a concentration gradient  
86 along the anterior-posterior (A-P) axis in the early embryo (**Fig. 1A-B, Supplemental Data File**  
87 **1**). The gradient provides positional information for downstream target genes, such as *hunchback*  
88 (*hb*), *giant* (*gt*), *Kruppel* (*Kr*), and *even-skipped* (*eve*). These genes and others together constitute  
89 a complex network that determines segmentation (Driever and Nüsslein-Volhard, 1988) and  
90 scaling (Gregor et al., 2005; Houchmandzadeh et al., 2002) along the A-P axis of the embryo.  
91 The network directly responds to an increase in the gene dosage of *bicoid* (wild-type to 4x, **Fig.**  
92 **1A-C**), whereby the increased  $\lambda$  of a steady-state exponential gradient (**Fig. 1D**) results in a shift  
93 of the cephalic furrow toward the posterior (Driever and Nüsslein-Volhard, 1988), indicated by a

94 posterior shift in the expression of *eve*, an essential segmentation gene expressed in a striped  
95 pattern (**Fig. 1E-F**). Despite the positional defects, embryos carrying two extra copies of the  
96 *bicoid* locus (*4xbcd*) can develop into normal adults—albeit with an increased frequency of  
97 cuticle defects (**Fig. 1G-I**) and reduced viability to adulthood (Berleth et al., 1988; Namba et al.,  
98 1997) (68.5%, **Fig. 1J, Table S1**).

99         The reduced viability of *4xbcd* flies is a fitness disadvantage that can be a selection  
100 pressure in experimental evolution (**Fig. 1K**). To explore the system's capacity to respond to a  
101 perturbation of Bicoid levels, we established 15 parallel laboratory populations from 7 pools of  
102 chemically mutagenized *4xbcd* flies (including replicates, see **Fig. S1**), along with three non-  
103 mutagenized populations which represent the standing variation in the lab stock. Based on  
104 whole-genome sequencing data, we estimated that the chemical mutagenesis with Ethyl  
105 methanesulfonate (EMS) introduced on average 2.7 point mutations per Mb. Thus, we estimated  
106 that the founding populations contained 1.7 million novel mutations (see **Methods, Fig. S1C**),  
107 providing genetic diversity for selection. We evolved the populations under standard laboratory  
108 conditions from the 4<sup>th</sup> generation after mutagenesis, after the generally deleterious mutations  
109 were purged in the first three generations, to select for compensatory mutations that can rescue or  
110 mitigate the fitness defect. We primarily used *eve* stripe positions as an indicator for  
111 compensatory changes: the compensated embryos should show *eve* stripes positions shifted to  
112 the anterior of the ancestral *4xbcd* line [ $37.2 \pm 0.4\%$  egg length (EL) for the first *eve* stripe, 95%  
113 confidence interval, Generation 4] and closer to the wild-type positions ( $28.3 \pm 0.6\%$  EL for the  
114 first stripe, VK33).

115         We found that compensation for the higher *bicoid* dosage occurred rapidly in our  
116 experimental populations. From the 4<sup>th</sup> to the 8<sup>th</sup> generation, the first *eve* stripe shifted to the  
117 anterior (toward the wild-type position) on average by 1.1% EL, from  $37.2 \pm 0.4\%$  EL to  $36.1 \pm$   
118  $0.2\%$  EL ( $p < 0.01$ , Wilcoxon test) (all populations aggregated, **Fig. 1L, bottom panel**). Other  
119 stripes also showed different magnitudes of anterior shifts compared to Generation 4, ranging  
120 from 0.4% EL (stripe 7,  $p = 0.04$ , Wilcoxon test) to 1.0% EL (stripe 3 and 4,  $p < 0.01$ , Wilcoxon  
121 test) (**Fig. 1L, bottom panel**). Among these populations, there were heterogeneous responses in  
122 *eve* positions (**Fig. 1L, top panel**), with populations 1-1-3A and 2-6-1A showing compensatory  
123 shifts in more than one stripe in Generation 8 (**Fig. 1L, Fig. S2A**). We did not find a higher

124 similarity between replicate populations from the same mutant pool than those from different  
125 pools. Interestingly, the compensatory shifts in population 1-1-3A occurred through a shortened  
126 anterior region, whereas population 2-6-1A compensated via an expansion in the posterior region,  
127 suggesting multiple possible mechanisms for compensation (**Fig. S2B-E**). These shifts could not  
128 be explained by loss of *bicoid* expression because the Bicoid gradient in the evolved population  
129 remained the same as the *4xbcd* ancestor line (**Fig. S2F**). Although these shifts are subtle  
130 compared to the drastic difference between *2xbcd* and *4xbcd*, a shift of 1% EL was the highest  
131 level of natural variation ever reported in *D. melanogaster* (Lott et al., 2007), suggesting that the  
132 early embryonic segmentation network can evolve rapidly in the lab under directed selection. In  
133 addition, the evolved populations showed increased viability, as measured by survival rates to  
134 eclosure after 16 generations ( $74.2 \pm 2.5\%$ , averaged across all populations) compared to the  
135 ancestral line ( $66.3 \pm 3.4\%$ ), consistent with adaptation (**Fig. S1D**).

136 Unexpectedly, we found that compensation in the *bicoid* network coincided with an  
137 increase in egg length across the populations. From the 4<sup>th</sup> to the 8<sup>th</sup> generation, median embryo  
138 length increased from 550  $\mu\text{m}$  to 567  $\mu\text{m}$  (all populations aggregated, **Fig. 1M**, histogram,  $p =$   
139  $1.81\text{e-}09$ , Wilcoxon test). Strikingly, despite variable embryo sizes, nine out of 12 populations  
140 showed an increase in median embryo length (1-1-1A, 2-2-1A, 2-2-2A, 2-3-1A, 2-3-2A, 2-4-1A,  
141 2-5-1A, 2-5-2A and 2-6-1A; **Fig. 1M**, colored lines; **Fig. S3**) and three of them (2-2-2A, 2-5-1A,  
142 2-6-1A) were statistically significant ( $p < 0.05$ , Wilcoxon test). This recurrent pattern suggests  
143 that an increase in embryo length might provide a quickly accessible mechanism to buffer the  
144 developmental stress caused by overexpression of *bicoid* and thus could drive the rapid  
145 compensatory changes we observed.

146 In parallel to phenotypic changes, we also found recurrent directional changes at the  
147 genomic level consistent with selection (**Fig. S4**). We performed low-coverage whole-genome  
148 sequencing for all 18 populations at the 3<sup>rd</sup> and 7<sup>th</sup> generation, and focused on changes in allele  
149 frequency in common variants shared across populations (i.e. standing variation) to understand  
150 the population dynamics at a broad scale. We found 16,394 biallelic variants showing consistent  
151 increases or decreases in allele frequency in two or more populations (Fisher's exact test, FDR-  
152 adjusted  $p < 0.05$ , **Supplemental Data File 2**). Based on a sign test, 181 of them were biased  
153 toward being maintained or purged in six or more populations (**Fig. S4C**). Recurrent gain or loss

154 of these alleles across multiple populations could suggest selection. For example, a non-  
 155 synonymous mutation in Melted (F21V) was purged in six populations at the 7<sup>th</sup> generation (**Fig.**  
 156 **S4D**), which could be beneficial because *melted* was linked to growth and metabolic pathways,  
 157 and its mutant showed nutrient deprivation (Teleman et al., 2005). Other variants potentially  
 158 under directed selection include those related to metabolism (e.g. *Apoltp*, **Supplemental Data**  
 159 **File 2**) and ovariole development (e.g. *mtgo*, *bru3*, **Fig. S4D, Supplemental Data File 2**) (Lobell  
 160 et al., 2017). These changes in allele frequency are consistent with rapid adaptation in the  
 161 laboratory populations, with possible links to maternal and metabolic-related genes.

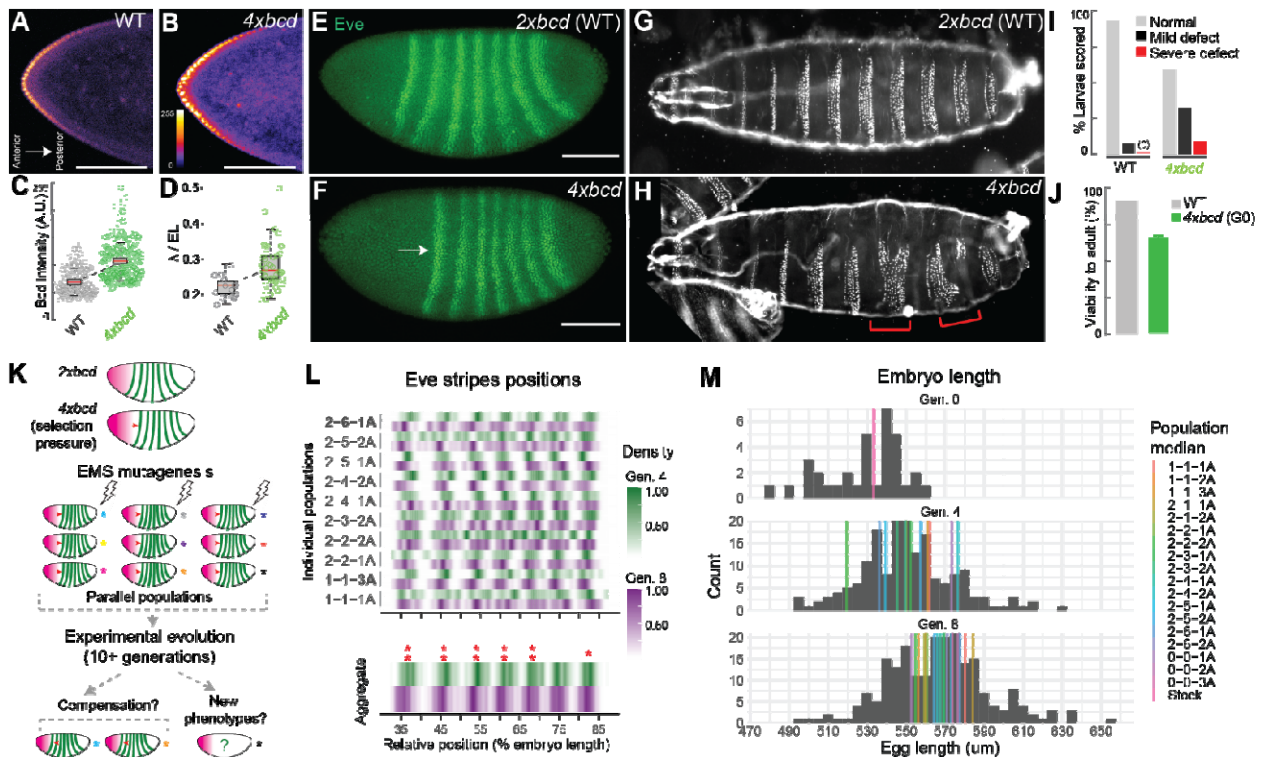

162

163 **Fig. 1. Rapid laboratory evolution after perturbation of the bicoid network.**

(A, B) Bicoid gradient along the anterior-posterior axis in embryos with two (wild-type) or four copies of *bicoid* (anti-Bicoid immunostaining, stage 4 embryos. Scale bar = 100 μm.). (C) Bicoid levels in the ten most anterior nuclei, quantified across 11 and 12 embryos for wild-type and 4xbcd, respectively. (D) Bicoid gradient slopes, represented by decay constant  $\lambda$  scaled to egg length (EL). (E, F) Expression of *even-skipped* (*eve*) (anti-Eve immunostaining, stage 5 embryos). Scale bar = 100 μm. (G, H, I) Cuticle phenotypes, with red brackets in (H) highlighting severe defects. (J) Viability to adulthood, with error bars representing the standard error of three measurements. (K) Scheme of experimental evolution. (L) Distribution of *eve* stripes positions in mid-stage 5 embryos, detected by *in situ* hybridization. Top, individual populations. Bottom, all populations aggregated (N=60 for Generation 4, N=217 for Generation 8). Intensity represents the scaled density of the designated population. Asterisks indicate shifts in the scaled position between generations. \*\*, p < 0.01; \*, p < 0.05 (Wilcoxon test, FDR-adjusted). (M) Distribution of embryo length across generations (grey histogram, all populations aggregated; N=34 for Generation 0, 176 for Generation 4, 217 for Generation 8). Color bars represent the median of each population. Population 0-0-1A, 0-0-2A, and 0-0-3A are non-mutagenized populations representing standing variation in the lab stock.



164

## 165 **Compensation of *bicoid* overexpression through an increase in embryo length**

166 To further address the possible link between embryo size and the *bicoid* network, we  
167 focused on population 2-6-1A to dissect the developmental changes before and after laboratory  
168 evolution. In this line, *eve* stripes consistently shifted to the anterior in the 8<sup>th</sup> and the 10<sup>th</sup>  
169 generation compared to the 4<sup>th</sup> generation (**Fig. 2A-C; Fig. S5A**), with the shift of the last stripe  
170 being the most prominent (**Fig. 2C-D**). We found that the shifts occurred simultaneously with an  
171 expansion of the posterior region: the egg length was consistently longer in both generations  
172 ( $540.5 \pm 6.5$   $\mu\text{m}$  at Generation 4,  $573.5 \pm 13.6$   $\mu\text{m}$  at Generation 8, and  $560.4 \pm 7.1$   $\mu\text{m}$  at  
173 Generation 10; **Fig. 2E, Fig. S5B**). The expression of *tailless*, a gap gene that specifies the  
174 posterior identity, was also wider in the 8<sup>th</sup> generation than the 4<sup>th</sup> generation (**Fig. 2F-I**). While  
175 the total number of nuclei along the A-P axis has not significantly changed (**Fig. S5C**),  
176 consistent with early embryos' limited capacity to regulate cell number (Busturia and Lawrence,  
177 1994), there was a slight increase in the number of nuclei in the posterior region, from *eve* stripe  
178 7 to the posterior pole at Generation 8 ( $12.3 \pm 0.9$  vs.  $14.1 \pm 1.1$ ,  $p = 0.048$ , Wilcoxon test, **Fig.**  
179 **2J**), as well as an overall increase in the distance between nuclei ( $6.39 \pm 0.23$   $\mu\text{m}$  vs.  $6.82 \pm 0.13$   
180  $\mu\text{m}$ ,  $p = 0.004$ , Wilcoxon test, **Fig. S5D-E**). Consistent with compensatory evolution, the evolved  
181 line has stabilized phenotypes across phenotypic scales, including cuticle phenotypes (**Fig. 2K**)  
182 and viability to adulthood after 15-16 generations (**Fig. 2L**).

183 The compensation via embryo size appeared to be relatively short-term, because the  
184 embryo length of population 2-6-1A peaked at Generation 8 and 10, but gradually reduced after  
185 Generation 15 and resumed wild-type level at Generation 49 (**Fig. S5A-B**). This could be due to  
186 the fact that overly large embryos might have deleterious effects and cannot persist as a long-  
187 term solution in the standard environmental conditions employed in this work. Such a turnover in  
188 adaptive strategies is not uncommon in laboratory evolution (Good et al., 2017; Lenski, 2017;  
189 Levy et al., 2015). Future research along these lines could reveal alternative strategies to  
190 compensate for high *bicoid* dosage that is independent of embryo size, such as the response of  
191 Population 1-1-3A, which showed a shortened anterior region (**Fig. 1J, Fig. S2**).

192 Together, these data lead us to hypothesize that the compression of the trunk and tail  
193 caused by extra Bicoid might be mitigated in larger embryos due to more space in the posterior  
194 region. These results are consistent with previous findings on the interaction between egg size

195 and the *bicoid* network (Huang et al., 2020; Lott et al., 2007; Miles et al., 2011). Furthermore,  
 196 because egg size is a highly polygenic and evolvable trait (Azevedo et al., 1996; Church et al.,  
 197 2019; Jha et al., 2015), it might have provided a large target for selection and thus accessible as a  
 198 means to respond rapidly.

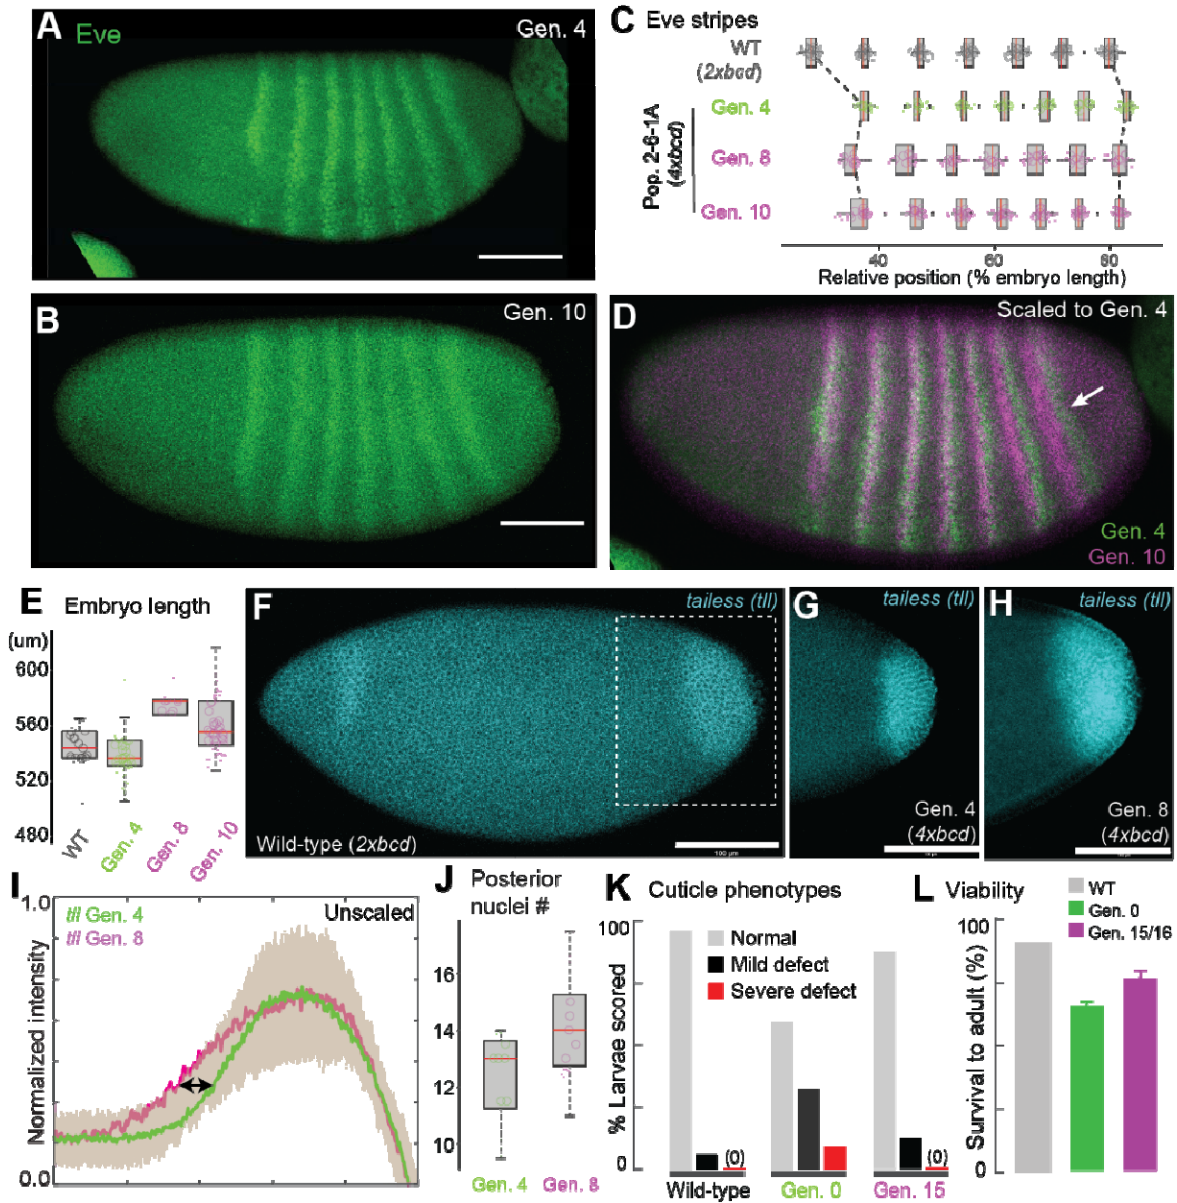

199

**Fig. 2. Compensatory changes in gene expression, embryo length, cuticle, and viability.**

(A-D) Eve stripes in Population 2-6-1A (anti-Eve staining), with the arrow in (D) showing a prominent anterior shift in the 7<sup>th</sup> stripe. The shifts were quantified in (C) from *in situ* data (*eve* co-stained with *sna*). (E) Increases in embryo length at the 8<sup>th</sup> and 10<sup>th</sup> generation. (F–i) *tailless (tll)* expression, detected by *in situ* hybridization. (I) shows the normalized intensity profiles aligned at the posterior end. Solid lines are average *tll* intensity and the shaded panels denote the standard deviation. N = 22 and 14 for the 4<sup>th</sup> and the 8<sup>th</sup> generation, respectively. (J) The number of nuclei from the posterior boundary of *eve* stripe 7 to the posterior pole. (K) Rescue of cuticle defects. (L)



Viability to adult, with error bars representing the standard error of three measurements (also see **Fig. S1**). Scale bar = 100  $\mu$ m.

200

## 201 **Multi-modal analysis reveals changes in metabolism and ovariole development**

202 To identify possible molecular bases that can support the rapid phenotypic stabilization  
203 through changes in egg length, we performed single-nuclei transcriptomics with early embryos in  
204 the evolved line (2-6-1A, Generation 20) (**Fig. S6, Table S2**). The evolved line had a striking  
205 increase in the proportion of yolk nuclei compared to wild-type or the *4xbcd* lab stock (6% vs.  
206 1%, **Fig. 3A**), consistent with the increased nutritional need of larger embryos. Among marker  
207 genes of the yolk cluster, there were 230 genes differentially expressed in the evolved line,  
208 including those related to metabolism (*bmm*, *trbl*, *Lime*, *Srr*) and cell growth (*crp*, *Traf4*) (**Fig.**  
209 **3B, C, and Supplemental Data File 3**). Previous research suggests that the *Drosophila*  
210 body/organ size can be directly controlled by signaling pathways involved in metabolic  
211 regulation and cell growth, such as the insulin signaling pathway (Böhni et al., 1999; Oldham et  
212 al., 2002). We found a number of metabolic genes differentially expressed in the evolved line  
213 across multiple cell types, including epidermal ('*ovo*'), trunk ('*opa*'), anterior ('*oc*') and  
214 posterior ('*byn*') clusters in the ectoderm, as well as in mesoderm, endoderm, yolk and pole cells  
215 (**Fig. 3D, Supplemental Data File 4**).

216 The changes in yolk content and gene expression might imply a broader change in  
217 maternal metabolism to direct more nutrients into the eggs, and thus enable larger embryo sizes.  
218 Indeed, we found that the evolved embryos contained more triglycerides (TG) than two wild-  
219 type lines (**Fig. 3E**). Triglycerides are essential components of yolk-related lipid droplets (Welte,  
220 2015) that can act as metabolic fuel for *Drosophila* embryogenesis (Tenessen et al., 2014), and  
221 high triglyceride levels have been linked to bigger embryo size in multiple animals (Mensch et  
222 al., 2021; Němec, 2002). To further quantify these changes, we performed MALDI-imaging  
223 mass spectrometry (Caprioli et al., 1997) on cryo-sectioned slices of ovaries to reconstruct entire  
224 mass spectra for single oocytes. We found differences in the lipid signature of oocytes between  
225 the evolved *4xbcd* line (2-6-1A, Generation 42) and wild-type (w1118) (**Fig. S7A**), including  
226 elevated levels of triglycerides and decreased levels of glycerophosphocholines in the evolved  
227 line (**Fig. 3F-G, Fig. S7B-C**). Additionally, there were global differences in the fatty acid (FA)  
228 distribution in the evolved line, showing a higher abundance of FAs with 13, 14, and 15 carbons,  
229 and reduced levels of FAs with 18 carbons on their chain (**Fig. 3G**). This observation was

230 confirmed by tandem mass spectrometry coupled with MALDI-imaging (**Fig. S7D-F**). Overall,  
231 these results show that the evolved line has altered its lipid metabolism in a way that is consistent  
232 with bigger embryo sizes and higher energy requirements.

233 The changes in gene expression and lipid composition suggest rapid physiological  
234 changes at the maternal level. We examined the ovaries of the evolved populations and found  
235 that they tended to have fewer ovarioles ( $12.4 \pm 0.3$  vs.  $14.8 \pm 0.7$ , all populations aggregated vs.  
236 wild-type aggregated, same below) and longer oocytes ( $498.4 \pm 2.9$   $\mu\text{m}$  vs.  $458.0 \pm 8.2$   $\mu\text{m}$ ) than  
237 wild-type lines (**Fig. 3H-J**). Therefore, the compensation could occur through a trade-off  
238 between the two traits (Church et al., 2021), possibly through growth-related mechanisms such  
239 as the insulin pathway (Green, 2014; Jha et al., 2015).

240 To further explore this hypothesis, we next tested if the process could be recapitulated  
241 genetically. Consistent with this hypothesis and previous reports (Green, 2014; Tu and Tatar,  
242 2003), we found that overexpression of the gene *chico*— a key component of the insulin  
243 signaling pathway—using the *nos:GAL4* driver and the Trip-OE system (Zirin et al., 2020), led  
244 to a reduction in oocyte length of  $475.2 \pm 8.0$   $\mu\text{m}$  to  $459.8 \pm 4.8$   $\mu\text{m}$  ( $p = 0.003$ , Wilcoxon test)  
245 and reduced levels of triglycerides of  $0.346 \pm 0.027$  nmole/embryo to  $0.125 \pm 0.061$  ( $p = 0.00967$ ,  
246 two-sided t-test,  $n = 3$ ), demonstrating that oocyte size could evolve through such genes in a  
247 short evolutionary timescale. Furthermore, we found that the change in size was specific to  
248 oogenesis and likely to have metabolic rather than behavioral underpinnings because we did not  
249 observe significant differences in larval length or larval feeding behavior (**Fig. S8**) (Church et al.,  
250 2019).

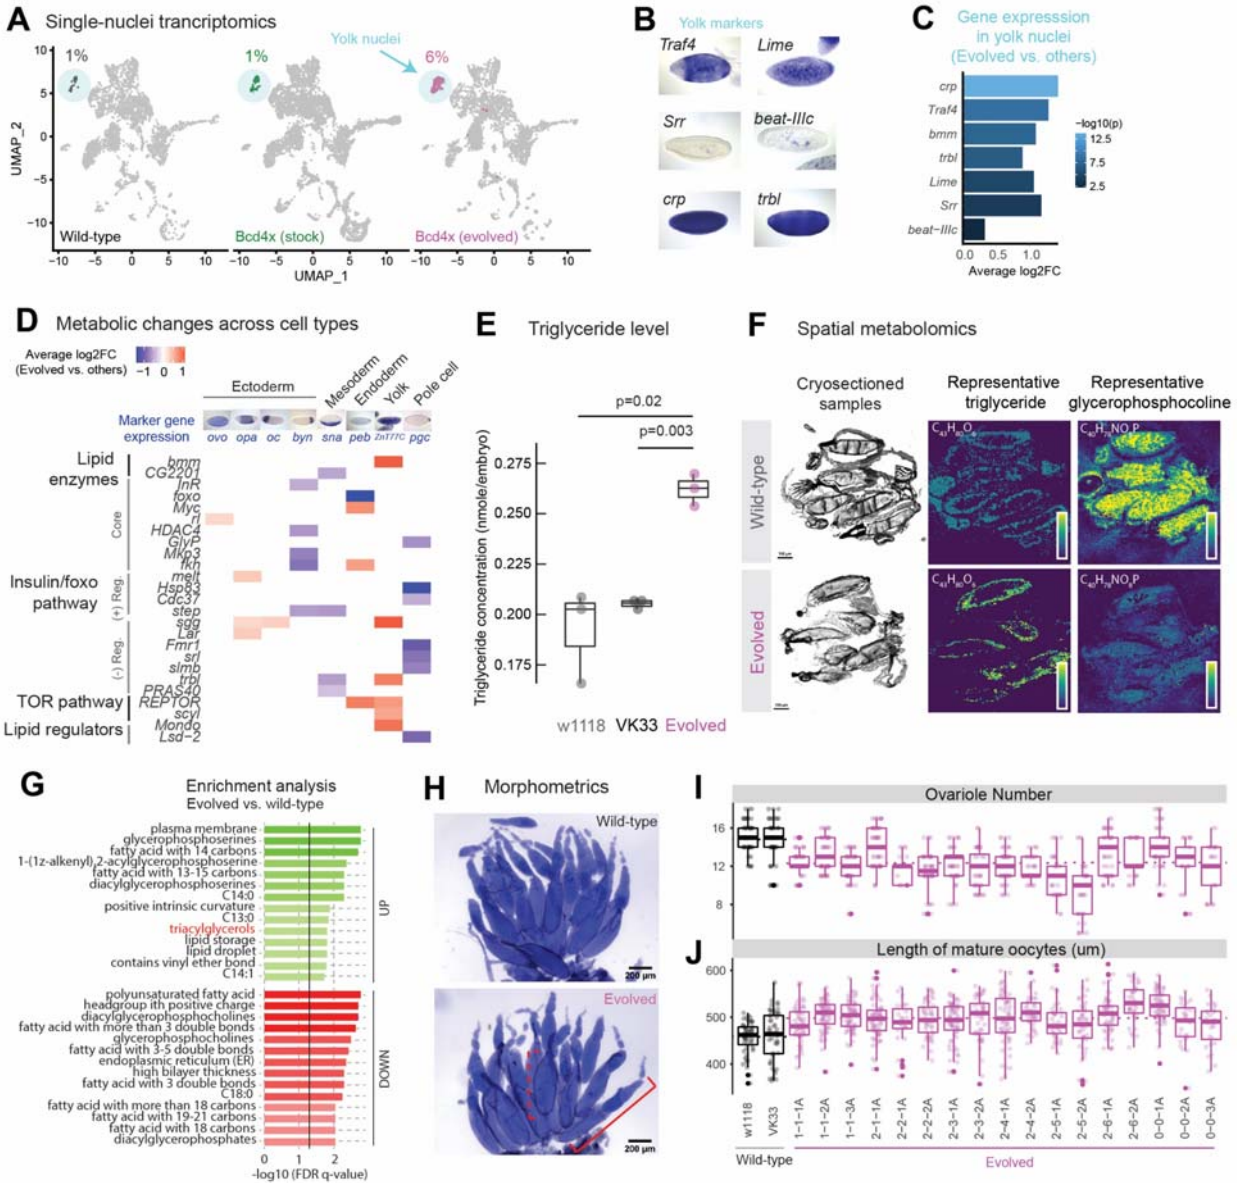

251

**Fig. 3. Phenotypic changes in gene expression, metabolism and ovariole development in the evolved lines. (A)** UMAP of single-nuclei transcriptomes of stage 5 embryos (see Fig. S6 for details). The colored clusters show yolk nuclei. Wild-type is VK33. The evolved line is population 2-6-1A at Generation 20. **(B)** Representative marker genes of yolk nuclei. **(C)** Representative marker genes of yolk nuclei that were differentially expressed in the evolved line. **(D)** Changes in expression of metabolic genes across cell types between the evolved line and the other two samples. Only significant changes (adjusted p-value < 0.05) are shown. (+) Reg., positive regulators; (-) Reg., negative regulators. FC, fold change. Images of marker gene expression in **(B)** and **(D)** are from BDGP *in situ* database (Hammonds et al., 2013). **(E)** Enzymatic determination of triglyceride levels in stage 5 embryos (Generation 50 for population 2-6-1A). Points represent values from independent homogenates made from 50 embryos each. P values are from Student's t-test. **(F)** MALDI-imaging of ovaries. Left, middle sections from ovaries employed in MALDI-imaging. Scale bar = 100  $\mu$ m. Middle, spatial distribution of a representative triglyceride, TG(40:1) at  $m/z=715.5846$  normalized by another triglyceride which showed constant levels across all experiments (TG(44:3) at  $m/z=767.6159$ ). Right, spatial distribution of a representative glycerophosphocholine, PC(32:1) at  $m/z=732.5537$ , in the sectioned ovaries. The evolved line is 2-6-1A from Generation 42. **(G)** Enrichment analysis comparing oocytes from the 2-6-1A and w1118 lines, based on the abundance values for 122 lipids detected through MALDI-imaging in both populations. The vertical solid line indicates a cutoff at FDR q-value of 0.05.

Triacylglycerols (highlighted in red) were enriched in the evolved line, consistent with results in (E). (H) Ovaries of wild-type (w1118) and evolved (2-6-1A, Generation 39) lines, stained with DAPI. The solid red bracket indicates an ovariole, and the dashed red bracket indicates a mature oocyte. Scale bar = 200  $\mu$ m. (I) Ovariole number and (J) length of mature oocytes of wild-type and the evolved lines (Generation 39). The horizontal dashed lines represent the mean of all wild-type/evolved lines aggregated ( $p = 9.783e-09$  for ovariole number and  $p < 2.2e-16$  for oocyte length, Wilcoxon test).

252

## 253 **Laboratory evolution predicts phenotypes of wild populations**

254 Embryo size is known to vary widely within and between *Drosophila* species (Lott et al.,  
255 2007) and across environments (Azevedo et al., 1996). As such, changes in embryo size could  
256 provide a way to rapidly mitigate the effects of Bicoid dose. To test if our observations could be  
257 extended to wild populations, we examined two near-isogenic lines isolated from the wild, Ind  
258 and Canton-S, with the former having larger embryos than the latter (Lott et al., 2007) (**Fig. 4A**).  
259 The anterior Bicoid concentration was also higher in the larger Ind embryos (**Fig 4B, C**),  
260 consistent with the relationship between Bicoid and embryo size in our laboratory-evolved lines,  
261 as well as previous results (Cheung et al., 2014). Strikingly, these two natural isolates also show  
262 differences in ovariole number and oocyte length (**Fig 4D**), as well as the level of triglycerides  
263 (**Fig. 4E**). Collectively, these observations suggest that the coupling among the *bicoid* network,  
264 egg size, maternal physiology, and metabolism could also exist in nature.

265 Next, to test if the bigger embryo size of the Ind genetic background could relieve the  
266 stress on the developmental network elicited by Bicoid overexpression, we crossed the *bicoid*  
267 transgenes into these inbred lines. In the crosses, the F1 offspring have 50% of genetic  
268 information from the wild isolates and have two extra copies of *bicoid* inserted on the second and  
269 the third chromosomes, respectively (4*xbcd* in total, see **Fig. S9A** for the crossing scheme). We  
270 also crossed them to a wild-type lab strain (VK33) to control for background effects. We found  
271 that embryos from F1 individuals in Ind/lab background were larger than those in Canton-S/lab  
272 background (**Fig. S9B**), suggesting that the Ind background had a dominant effect on embryo  
273 size. The *eve* stripes in Ind/lab background were located further to the anterior than the Canton-  
274 S/lab background in the control crosses (2*xbcd*) (**Fig. S9C**), suggesting natural variation in the  
275 capacity for scaling of the network. Such variation might be in favor of buffering stresses such as  
276 overexpression of *bicoid* - the difference was also present in embryos with 4*xbcd*, with the *eve*  
277 stripes of Ind embryos being anterior to those of Canton-S embryos, i.e. closer to the wild-type  
278 positions (**Fig. 4F-I**). Interestingly, the positions of *eve* stripes (**Fig. 4I**) and cuticle phenotypes  
279 (**Fig. 4J-L**) of 4*xbcd*-Ind embryos resembled those of the evolved population 2-6-1A in



280 laboratory evolution. *4xbcd* embryos in the Ind background also had higher viability to  
 281 adulthood compared with those in Canton-S or lab background (**Fig. S9D**), consistent with a  
 282 higher tolerance of *bicoid* overexpression in larger embryos. Together, the evolved line is similar  
 283 to Ind across a number of key phenotypes, supporting the hypothesis that changes in maternal  
 284 contributions to embryo sizes could be used to buffer the dosage of *bicoid*.

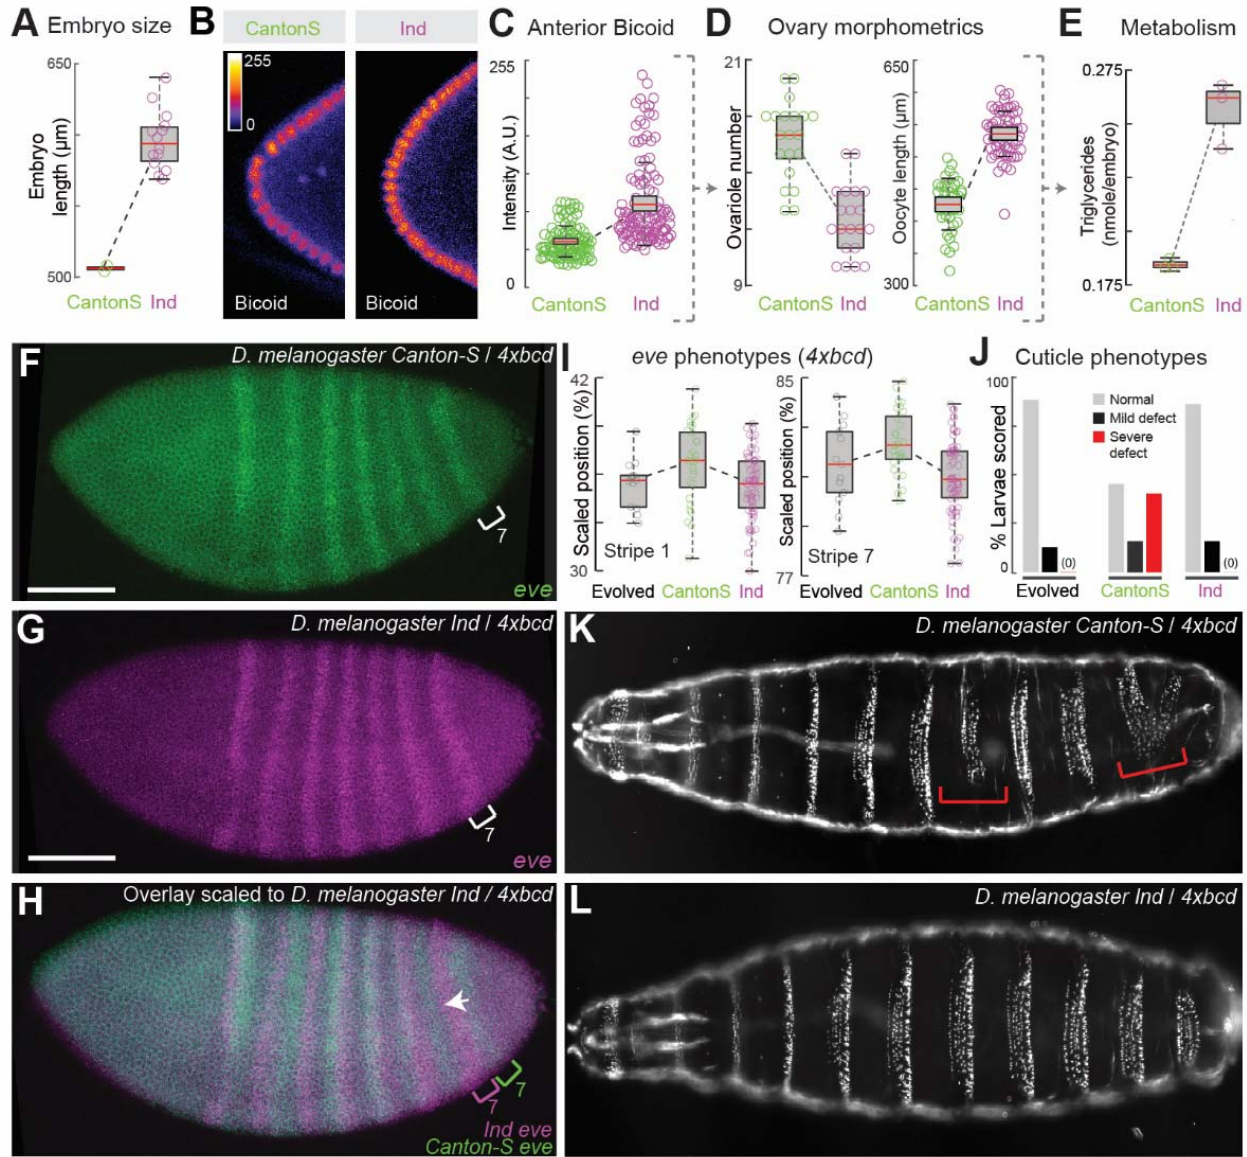

285 **Fig. 4. Wild populations' responses to extra copies of *bicoid* and model for adaptation.**  
 (A) Embryo size and (B-C) anterior Bicoid concentration (anti-Bicoid staining) of Ind and Canton-S. Each point  
 represents one nucleus in (C), quantified across 18 and 10 embryos for Ind and Canton-S, respectively. (D) Ovariole  
 number, oocyte length, and (E) level of triglycerides per embryo of Ind and Canton-S. (F-I) *eve* stripe positions and  
 (J-L) cuticle phenotypes of Ind and Canton-S when carrying *4xbcd*. Scale bar = 100 μm. The red brackets in (K)  
 highlight severe defects. Data for the evolved line in (I) were from Generation 8. See **Fig. S9** for full data.

286



287 The trends we found from laboratory evolution are consistent with our findings from the  
288 larger *D. melanogaster* Ind line, in line with evidence that *Drosophila* can adapt rapidly to  
289 laboratory culture on ecological timescales (Rudman et al., 2022). To explore the broader context  
290 of these results, we looked across a number of closely related *Drosophila* species (**Fig. 5A, Fig.**  
291 **S10**), testing the relationship between ovariole number and oocyte lengths (**Fig. 5B**). Strikingly,  
292 we see a strong correlation across the *Sophohora* subgenus indicating that such a trait may be  
293 consistent across a broader evolutionary context.  
294

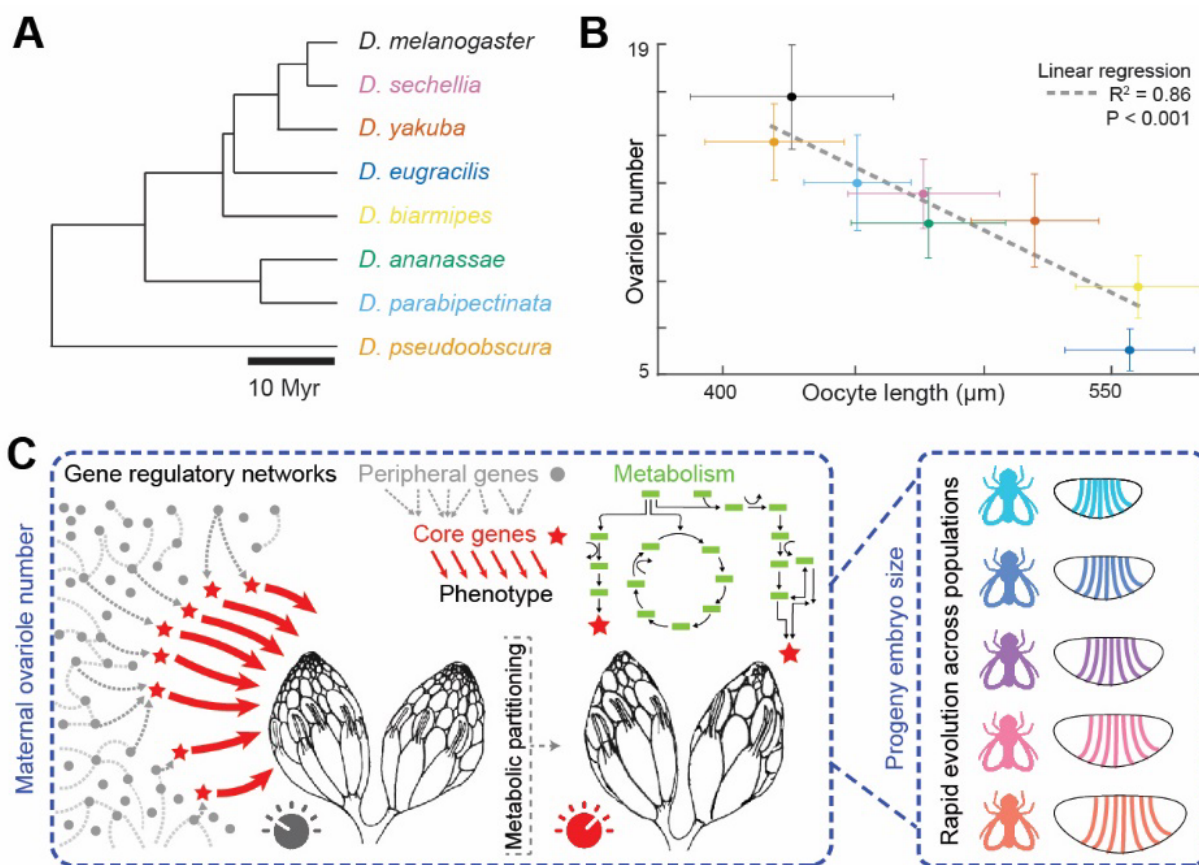

295  
296 **Fig. 5. Laboratory evolution predicts phenotypes of wild species.** (A) Phylogeny of species tested (Suvorov et al., 2022). (B) The relationship between ovariole number and oocyte  
297 length, error bars denote the standard deviation; colors are indicated in panel A. *D. melanogaster* was represented  
298 by Canton-S. (C) Model for maternal adaptation in laboratory evolution (adapted from (Liu et al., 2019)).

## 298 Discussion

299 Little is known about how organisms respond to developmental perturbations in a short  
300 evolutionary timescale. The early segmentation network downstream of Bicoid has been  
301 characterized as a highly dynamic (Bothma et al., 2014) yet robust network to ensure precise

302 scaling of gap gene boundaries (Cheung and Ma, 2015; Cheung et al., 2014; Gregor et al., 2005;  
303 Lott et al., 2007). Perturbations to the network, such as a change in *bicoid* dosage, can lead to  
304 substantial patterning defects and fitness disadvantages (Namba et al., 1997) (**Fig. 1**). Leveraging  
305 the fitness disadvantage as a selection pressure provided us an opportunity to examine the  
306 robustness and evolvability of developmental systems. Strikingly, we found compensatory  
307 changes within 8-15 generations, reflected in gene expression, larval morphologies, and survival  
308 to adulthood (**Fig. 1-2**), as well as recurrent changes in allele frequency among parallel-evolving  
309 populations (**Fig. S3**), suggesting rapid adaptation in response to the developmental perturbation.  
310 These results are consistent with the recent findings that adaptation in *Drosophila* was evident  
311 over only one to four generations in response to environmental changes, including changes in  
312 egg-size (Rudman et al., 2022). Such rapid phenotypic adaptation and large allele-frequency  
313 shifts over many independent loci in response to developmental changes may be a common  
314 mechanism for gene-regulatory network evolution (Rudman et al., 2022).

315 Our results support previous observations that embryonic geometry can affect the scaling  
316 of gap gene boundaries under perturbations (Huang et al., 2020; Miles et al., 2011),  
317 demonstrating an inherent link between the embryonic size-control network and the early  
318 segmentation network. In particular, we found that the increase in egg length has the most  
319 prominent effect on the posterior region (**Fig. 2**), consistent with a recent study showing that  
320 posterior boundaries in *Drosophila* embryos are highly dynamic and sensitive to gene dosage  
321 (Clark et al., 2022). The rapid phenotypic compensation driven by embryo size is likely related  
322 to its genetic architecture. Egg size is a trait known to be both highly polygenic (Jha et al., 2015)  
323 and evolvable in both common garden experiments (Miles et al., 2011; Rudman et al., 2022) as  
324 well as across natural populations (Azevedo et al., 1996; Church et al., 2019; Lott et al., 2007).  
325 As such, the egg-size network might provide a much larger set of targets for selection than  
326 targets directly downstream of Bicoid, and hence the change in egg length appeared as the first  
327 response in a short evolutionary timescale. These results are consistent with models that posit  
328 that phenotypic evolution may be driven by many loci of small effect (Rockman, 2012; Zhang et  
329 al., 2021). Furthermore, the rapid changes were associated with changes in ovariole number,  
330 which is also known to be controlled by many genes (Lobell et al., 2017), resulting in changes in  
331 metabolism and embryo size. Therefore, there could be numerous genes at different phenotypic  
332 levels that provide evolutionary accessibility to compensation. It is possible that the

333 segmentation network, which can readily scale within and between species (Gregor et al., 2005),  
334 is the result of selection for a highly evolvable system that provides developmental plasticity for  
335 early embryos across variable ecologies (Moczek et al., 2011) (**Fig. 5C**).

336 The phenotypic differences of the evolved *4xbcd* line were not limited to early embryonic  
337 development but included changes in lipid metabolism (increased yolk content and triglyceride  
338 levels), cell-type-specific gene expression (rewiring of metabolic gene network), and maternal  
339 anatomy (reduced ovariole numbers) (**Fig. 3**). These results show that perturbation of one node  
340 of the developmental network, the *bicoid* dosage, can lead to profound organism-wide responses  
341 across multiple phenotypic scales. Metabolic genes such as *melted*, *bmm*, and others identified in  
342 the genomic and transcriptomic analyses (**Fig. 3 and Fig. S3**) might provide a molecular basis  
343 for the observed evolutionary changes. Importantly, these observations highlight the deep  
344 connections between multiple phenotypic layers of multicellular systems and argue for a broader  
345 ‘phenomics’ perspective (Gandara et al., 2022), instead of a strictly gene-centric view. In the  
346 future, exploring the interplay of metabolic and developmental networks could transform our  
347 understanding of evolution and development across variable ecologies (Miyazawa and Aulehla,  
348 2018; Perkins et al., 2022), as such processes are fundamentally linked (White et al., 2022).

349 Finally, our experiments show that it is not only possible to observe the evolution of  
350 developmental systems in the laboratory in real-time, but also to extend the results to trends  
351 found in nature. For example, one laboratory-evolved population (2-6-1A) showed similar rescue  
352 effects to a natural line with larger embryos (Ind), and, overall, similar phenotypes—including  
353 lipid profiles, ovariole number, and protein concentration—suggesting that the buffering  
354 mechanism observed in this study could exist in nature (**Fig. 4-5**). Reducing the inherent  
355 complexities among natural populations, such as variable environments, population dynamics,  
356 and standing variation, while also leveraging high-dimensional phenomics techniques, could  
357 allow us to investigate the evolution of complex developmental systems. Together, our results  
358 necessitate a broader view of developmental evolution at the systems level and suggest that such  
359 knowledge learned from experimental evolution can help predict evolutionary trends in nature.

360  
361  
362  
363

364 **Methods**

365 **Fly genetics**

366 The eGFP-Bicoid fusion construct was designed according to (Gregor et al., 2007) (see  
367 **Supplemental data File 5** for the construct map). The construct was synthesized and cloned into  
368 *placZattB* by Genscript, and was transformed into *D. melanogaster* at the VK18 or VK33  
369 landing site following standard PhiC31 integrase protocol, with the help of injection service  
370 provided by Alessandra Reversi at EMBL. The transformants at the VK33 site were  
371 homozygosed by sibling crosses to construct a stable *4xbcd* line and subsequently used in  
372 mutagenesis and experimental evolution.

373 We also established balancer stocks from the transformants at VK18 (second  
374 chromosome) and VK33 (third chromosome) sites, and used them to generate a *6xbcd* line, with  
375 an extra copy of *bicoid* on each of the second and the third chromosomes.

376 Overexpression of *chico* was done by Trip-OE system (Zirin et al., 2020). Virgin flies of  
377 NGT40>dCas9-VPR (Bloomington stock #67052; w[\*]; P{w[+mC]=GAL4-nos.NGT}40;  
378 P{UAS-3XFLAG-dCas9-VPR}attp2) were crossed to males of gRNA lines, targeting sequences  
379 near transcription start sites of candidate genes. *chico*: #76114, y[1] sc[\*] v[1] sev[21]; P{y[+t7.7]  
380 v[+t1.8]=TOE.GS00909}attP40/CyO. Non-targeting control (QUAS): #67539, y[1] sc[\*] v[1]  
381 sev[21]; P{y[+t7.7] v[+t1.8]=GS00089}attP40). Non-CyO F1 females were dissected for  
382 ovariole analysis.

383 To examine the response to extra copies of *bicoid* in wild populations, virgins of Ind  
384 (“Mysore” strain, old stock #3114.4 from National Drosophila Species Stock Center, US) and  
385 Canton S (Bloomington stock #64349) were crossed to *6xbcd* males. The F1 flies are  
386 heterozygous for the alleles from the wild populations and carry two extra copies of *bicoid*. They  
387 were used to set up egg-collection chambers and the F2 embryos were examined for *eve*  
388 expression, cuticle phenotypes, and fitness (**Fig. S9A**). To control for background effects, the  
389 natural isolates were crossed to the VK33 stock, which has the same background as the *6xbcd*  
390 line.

391 At Generation 40, we outcrossed 2-6-1A males to wild-type w1118 or VK33 for four  
392 generations. In each generation, males with orange eyes (heterozygous for the *egfp-bicoid*  
393 transgene) were crossed to virgins of w1118 or VK33. After four generations, males and virgins  
394 with orange eyes were mated, and their progeny were selected for homozygotes (red eyes) to

395 create ‘new’ *4xbcd* lines. In this way, we expect to remove or ‘dilute’ 2-6-1A-associated  
396 mutations and study the effects of *4xbcd* without any compensatory evolution.

397 The non-*melanogaster* species were a generous gift from Nicolas Gompel, with the  
398 exceptions of *Drosophila parabiopectinata* which was kindly provided by Artyom Kopp, and  
399 *Drosophila virilis*, which was kindly provided by Eileen Furlong. Strain background: *D.*  
400 *ananassae* (TSC 14024-0371.13), *D. biarmipes* (TSC 14023-0361.01), *D. eugracilis* (from the  
401 US National *Drosophila* Species Stock Center), *D. parabiopectinata* (inbred derivative of strain  
402 TSC 14024-0401.02), *D. pseudoobscura* (TSC 14011-0121-94 USA), *D. sechellia* (TSC 14021-  
403 0248-25), *D. yakuba* (TSC 14021-0261.01) and *D. virilis* (*w*).

404

### 405 **Mutagenesis and experimental evolution**

406 EMS-mutagenesis was performed according to (Bökel, 2008). Briefly, around 1,000  
407 *4xbcd* male flies (G0) were fed with 1% sucrose solution containing 25mM EMS, and were then  
408 mated to *4xbcd* virgins. Around 3,500 F1 flies were used to establish 7 independent mutant pools,  
409 with 400-600 flies per pool. Specifically, the mutagenesis was done in two batches: flies from  
410 the first batch were used to establish one mutant pool, labeled 1-1, and flies from the second  
411 batch were used to establish six mutant pools, labeled 2-1 to 2-6. Mutation rate did not obviously  
412 differ between the two batches based on subsequent genomic analysis (see below).

413 Each mutant pool was used to seed 2-3 bottles of progenies consecutively (‘set A’) and  
414 these bottles were replicated at the 3<sup>rd</sup> generation (‘set B’), to provide 4-6 replicate populations in  
415 total for each mutant pool (**Fig. S1A**). For example, Pool 1-1 was used as parents to produce  
416 Populations 1-1-1A, 1-1-2A and 1-1-3A, by transferring the parents to a new bottle every 4-5  
417 days. F3 flies from these populations were used as parents to produce Populations 1-1-1B, 1-1-  
418 2B, and 1-1-3B, respectively. Populations in set B were primarily for backups in this study.

419 The flies were maintained at 25°C under standard fly-rearing condition under non-  
420 overlapping generations, to select for rescuing mutations. The population size was approximately  
421 200-500 for each generation. Three populations of non-mutagenized *4xbcd* flies were maintained  
422 under the same condition for comparison (labeled 0-0-1A, 0-0-2A and 0-0-3A). During the first  
423 15 generations, the populations were sampled every 2-5 generations for embryo collection, and  
424 the adult flies were frozen for genomic DNA (**Fig. S1B**).

425



426 **Embryo fixation, antibody staining and fluorescent *in situ* hybridization**

427 *Drosophila* embryos were fixed and stained following standard protocols (Galupa et al.,  
428 2022). In particular, stage 5 embryos were acquired from a 5 hr egg-laying window at room  
429 temperature. A fixation time of 18 min was used for these embryos, to adapt to the sensitivity of  
430 Eve antibody. The Eve antibody (mouse, Developmental Studies Hybridoma Bank, 2B8-  
431 concentrate) was used at 1:20 dilution. Bicoid antibody (rabbit) was a gift from Pinar Onal and  
432 Stephen Small, and was used at 1:250. DIG-, FITC- or biotin-labeled, antisense RNA-probes  
433 were used to detect gene expression of *eve*, *sna*, or *tll*, respectively. All embryos were mounted  
434 in ProLong Gold with DAPI, and imaged on a Zeiss LSM 880 confocal microscope, under 20x  
435 (air, 0.8 NA) or 25x (oil, 0.8 NA) objective.

436  
437 **Image analysis**

438 All images were rotated to orient along the A-P axis before analysis.

439 **Position of *eve* stripes.** Images from *in situ* hybridization of *eve*, *snail* (*sna*) and *tailless* (*tll*) were  
440 used to quantify *eve* position precisely. We extracted the positions of the intersection of *sna*  
441 expression and the anterior boundary of each *eve* stripe in mid-stage 5 embryos (see **Fig. S2C** for  
442 an example), staged based on the degree of membrane invagination. The use of *sna* to mark a  
443 particular dorsal-ventral position on the *eve* stripes enabled precise quantification of the *eve*  
444 positions, which could also explain the differences between our results on Ind and Canton-S and  
445 a previous publication (Lott et al., 2007).

446 **Embryo length.** Embryo length was extracted from z-stacked confocal images, from anterior to  
447 posterior, excluding the pole cells.

448 **Bicoid concentration.** Bicoid intensities were acquired from anti-Bicoid staining by extracting  
449 the average nuclear intensity for ten nuclei at the anterior pole for each embryo, as per (Dubuis et  
450 al., 2013).

451 **Slope of Bicoid gradient.** Bicoid intensity along the A-P axis was measured at the depth of mid-  
452 embryo, by sliding a rectangle (smaller than a nucleus) along the edge of the embryo, from  
453 anterior to posterior (Houchmandzadeh et al., 2002). The shape of Bicoid gradient is described  
454 by the length constant  $\lambda$  (Cheung and Ma, 2015). The log-transformed, unscaled intensities  
455 between 10% to 50% egg length were fitted to a linear model, and the slope ( $k$ ) from the linear

456 model was used to calculate  $\lambda$ :  $\lambda = -\frac{1}{k}$ .

457 ***Tll profiles.*** The intensity profiles were extracted from a rectangular region of 3-4 cells' height  
458 along the A-P axis from max-projected confocal images (Crocker et al., 2016), normalized to  
459 peak intensities. The dorsal-ventral position was determined using the border of *sna* expression.

460 ***Nuclei counts.*** The number of nuclei along the A-P axis was counted along the *sna* border  
461 independently by two experimenters (X.C.L and L.G.). Numbers from the two experimenters  
462 were averaged for each embryo (see **Fig. S5** for more details).

463 ***Nuclei distance.*** While counting the nuclei, we marked the center of each nuclei and extracted  
464 their coordinates to calculate the distance between neighboring nuclei along the A-P axis.

465

#### 466 **Cuticle preparation**

467 Overnight embryos were collected, bleached, rinsed and transferred into clean water in a  
468 petri dish, where they were allowed to develop for 24h at room temperature. After 24h, the  
469 larvae were transferred onto a glass slide and mounted in Hoyer's medium. The slides were  
470 baked in an oven at 55°C for 48h and were then imaged with dark field microscopy.

471 The cuticle images were scored based on the criteria from (Namba et al., 1997): severe  
472 defect – fusion or missing segments; mild defect – missing or misaligned denticles in any  
473 segment; normal – no visible defects. w1118 was used as wild-type.

474

#### 475 **Survival assay**

476 Around 100 embryos from an overnight plate were manually transferred onto an apple juice plate  
477 with yeast in the center, and left at room temperature for 24h. On the second day, the number of  
478 unhatched embryos were counted for each plate, and the entire agar (with larvae and unhatched  
479 embryos) was transferred to a food vial. The eclosed adults were counted from day 12 until no  
480 adults came out. All the survival assays were performed at room temperature.

481

#### 482 **Whole-genome sequencing**

##### 483 ***Genomic DNA extraction and library preparation***

484 We sequenced 20 F1 flies individually to estimate the level of genetic variation in the  
485 founding populations (1-4 flies from each mutant pool). To prepare genomic DNA from F1  
486 individuals, each fly was squished and incubated at 37 °C for 30 min in Squish Buffer (10 mM  
487 Tris pH 8.0, 1 mM EDTA, 25 mM NaCl, 0.15 mg/ml Proteinase K), followed by a clean-up with

488 a Genomic DNA Clean & Concentrator kit (Zymo Research). The DNA was tagmented with a  
489 customized Tn5 protocol and sequenced in 75 bp (maximum 92 bp) paired-end on an Illumina  
490 NextSeq 500 at EMBL GeneCore.

491 Genomic DNA from the evolved populations was prepared using a Qiagen DNeasy  
492 Tissue Kit protocol (from Alexey Veraksa), with around 100 frozen flies (about 400 ul packed  
493 flies) per population. There are 38 samples: 18 populations  $\times$  2 generations (F3, F7) and 1 focal  
494 population (2-6-1A)  $\times$  2 additional generations (F9, F15). They were tagmented as described  
495 above and sequenced in 50 bp (maximum 88 bp) single-end on an Illumina NextSeq 2000, with a  
496 pooling strategy intentionally biased toward higher coverage of 2-6-1A samples.

#### 497 ***Read mapping and variant calling***

498 The reads were aligned to the dm6 genome with `Bowtie2` (Langmead and Salzberg,  
499 2012), and duplicated reads were removed with `Picard` tools. To rule out *Wolbachia* infection,  
500 we aligned the reads to a *Wolbachia* reference genome (wMelPop, GCF\_00475015.1), and found  
501 0.0 % of reads aligned in all samples. After pre-processing, we acquired a total of 89.5 million  
502 reads for the 20 F1 individuals. As a preliminary analysis, we called variants in F1 individuals  
503 with `FreeBayes` (Garrison and Marth, 2012), with a threshold of 30 for mapping quality and 20  
504 for base quality, on sites with a minimum coverage of 4. We found 375,779 variable positions  
505 among F1 individuals (variant quality score  $>10$  and allele frequency  $<1$ ), suggesting a  
506 substantial amount of variation in the starting populations.

507 For pooled-sequencing (Pool-seq) of evolved populations, we obtained an average of 5  
508 million reads for each non-focal sample, and an average of 16 million reads for 2-6-1A samples  
509 after pre-processing. Data from F1 individuals were computationally pooled. Together our reads  
510 cover 36.6% of the genome. Despite the shallow coverage, we regard each read to be randomly  
511 sampled from the population and the allele frequency may be roughly represented by the ratio of  
512 allele depth (AD). To extract this information, we used a pipeline adapted for Pool-seq data (Jha  
513 et al., 2015; Schlötterer et al., 2014): first, we realigned the reads around indels and performed  
514 base recalibration with `GATK4`, using the list of known variants in F1. Variable sites were then  
515 identified with `bcftools mpileup` and `bcftools call`, with allele depth (AD) extracted for  
516 each sample. 936,533 positions are found variable among the samples (variant quality score  $>10$   
517 and allele frequency  $<1$ ). The variants were then annotated with `ANNOVAR` (Wang et al., 2010).

518 Unfortunately, the shallow coverage did not allow us to confidently detect EMS-induced  
519 mutations in the population data. For the non-focal populations, there were 18-56 variants private  
520 to each mutant pool (at sites with sufficient coverage), and there were 1,663 private variants for  
521 pool 2-6, which is likely associated with the high coverage on population 2-6-1A. Therefore, we  
522 focused on common variants among the populations in the genomic analysis.

523 The NGS reads are deposited at ArrayExpress (EMBL-EBI) under experiment no. E-  
524 MTAB-11768.

### 525 *Estimation of EMS mutation rate*

526 We used the freebayes calls from the twenty F1 individuals to estimate the mutation rate  
527 induced by EMS treatment. To estimate the mutation rate, we needed to apply more stringent  
528 filters to remove background mutations. We first removed indels and sites with missing data in  
529 more than two individuals. Furthermore, we only kept sites with a mean depth between 4 and 50,  
530 and all genotypes with a depth outside this range were considered missing data. We then used  
531 `bcftools +prune` to remove small linkage blocks (sites with  $r^2$  higher than 0.6 within a 1kb  
532 window), which were likely to be background variation. After these filters, there were 13,292  
533 SNPs in the dataset. We then identified SNPs that were only present in one individual (minor  
534 allele count = 1), with a requirement of at least 3 reads supporting the observed allele (AO or  
535 RO >2). In this way, we identified 1,036 mutations across 19 mutagenized individuals (on  
536 average 55 mutations per individual) and 7 private SNPs in one non-mutagenized individual.  
537 Normalized to the number of bases covered in each individual (with the same quality and depth  
538 filter as when applying freebayes), the estimated mutation rate was on average 2.7 mutations per  
539 Mb, ranging from 0.9 to 5.4 mutations per Mb among individuals (**Fig. S1C**). The mutation rate  
540 was not obviously different between the two mutagenesis batches. Based on these data, we  
541 estimated the total number of novel mutations introduced to our experimental populations to be  
542  $2.7 \times 180\text{Mb} \times 3500 \text{ individuals} = 1,701,000$  mutations.

### 543 *Changes in allele frequency of common variants*

544 For each population, we used `bcftools +ad-bias` to apply fisher's exact test to compare  
545 allele ratio between F3 and F7, with requirements on the minimum alternative allele depth (2)  
546 and minimum depth (10). Out of the 450,739 biallelic sites tested, 54,045 (12%) sites show  
547 significant changes in allele frequency between generations in at least one population (FDR-  
548 adjusted  $p < 0.05$ ). The changes in allele frequency span a wide range, with most changes being

549 transitions between homozygous and heterozygous states (**Fig. S3A**), which is probably  
550 associated with the detection limit imposed by sequencing depth (mean depth is 29 and median  
551 depth is 21 for the sites surveyed, **Fig. S3B**).

552 Since fisher's exact test might be an overly relaxed test on allele frequency and could  
553 lead to false positives (Jha et al., 2015; Turner et al., 2011), we applied a sign test (Orr, 1998) to  
554 narrow down the list of variants to those showing recurrent changes in multiple populations.  
555 Each variant is given a score:  $S = N_{\text{REF increase}} - N_{\text{REF decrease}}$ , where  $N_{\text{REF increase}}$  is the number of  
556 populations showing a significant increase in reference allele frequency and  $N_{\text{REF decrease}}$  is the  
557 number of populations showing a significant decrease in reference allele frequency. Therefore,  
558 the  $S$  score represents the tendency for the alternative allele to be purged (if  $S > 0$ ) or fixed (if  $S <$   
559  $0$ ) during evolution. Out of the 450,739 biallelic sites tested, 16,394 sites (4%) showed consistent  
560 increases or decreases in allele frequency in more than one population. The mean of  $S$  among  
561 these sites is 0.56, suggesting a slight systematic bias for detecting decreases in alternative allele  
562 frequency, but the majority of the changes among populations are in random directions (mean  $S$   
563 is close to 0). By using a cutoff of  $S > 5$  or  $S < -5$ , we report on the top 1% sites (181 among  
564 16,394) that show consistent directional changes across the parallel-evolving populations.

### 565 ***Genotype-phenotype association***

566 Due to the low coverage and small sample size, we used genotype calls instead of allele  
567 frequency to perform genotype-phenotype association. We restricted this analysis to sites with a  
568 minimum mean depth of 10, leaving 261,167 sites in the dataset. We used the mean length of F4,  
569 F8, F10, and F17 embryos as the phenotype, to associate with the 'population genotypes' of their  
570 parent generation (F3, F7, F9, and F15). Note that we used the length of F17 embryos as the  
571 phenotype of F15 population, due to missing data in F16. For each variant, a linear model is used  
572 to estimate the effect size and significance of the genotype. For variants with three genotypes  
573 ("0/0", "0/1" and "1/1"), the smaller p-value is used. Due to the small sample size (30 samples at  
574 most), we don't think that the association analysis has enough statistical power to support any  
575 variant to be an interesting candidate, but the results could be used as a reference to prioritize  
576 variants detected by the sign test (e.g. the intronic G>T mutation in *CG1136* in **Fig. S3E**). The p-  
577 values are included in **Supplemental Data File 2**.

578

### 579 **Single-nuclei transcriptomics**



580 2.5h-to-3.5h-old embryos (developed at room temperature) were dechorionated and flash-  
581 frozen in liquid nitrogen for nuclei preparation. The evolved embryos are from population 2-6-  
582 1A, at the 20<sup>th</sup> generation. They were manually examined, and smaller embryos were removed  
583 upon collection, to reduce noise and focus on relatively large embryos. A wild-type line (VK33)  
584 and the *4xbcd* lab stock were treated in parallel.

585 Nuclei isolation was performed following a standard protocol (10x Genomics® Single  
586 Cell Protocols, with adaptations from Francisca Hervas-Sotomayor at Heidelberg University).  
587 The frozen embryos were squished with a pestle for 20 times in cold homogenisation buffer (HB)  
588 [250 mM sucrose, 25 mM KCl, 5 mM MgCl<sub>2</sub>, 10 mM Tris-HCl (pH 8), 0.1% Nonidet  
589 P40/IGEPAL, 1 uM DTT, 0.4 U/ul RNAse Inhibitor (New England Biolabs), 0.2 U/ul  
590 SUPERase•In™ RNase Inhibitor (Invitrogen)]. The samples were then centrifuged at 100 g for 1  
591 min to remove unlysed tissue, and the supernatant was centrifuged at 1,000 g for 5 min to pellet  
592 the nuclei. The pellet was washed once in HB, filtered twice with Flowmi® Cell Strainers  
593 (Sigma), and resuspended in PBS. A subsample of the nuclei prep was DAPI-stained and  
594 examined under the microscope, to determine the density of nuclei. For each sample, 7,500  
595 nuclei were used as the input for 10x library construction. RNA-seq was performed on an  
596 Illumina NextSeq 500 at EMBL Genomic Core Facilities (GeneCore) in two runs.

597 The reads were mapped to the *Drosophila* reference genome (dm6) plus the eGFP-Bicoid  
598 plasmid sequence and counted with Cell Ranger (6.0.1), with intronic reads included. The count  
599 data were analyzed with Seurat (3.9.9.9010) (Stuart et al., 2019) in R, with the three samples  
600 merged into one data frame. They were first filtered to remove 1) nuclei with extremely low (<  
601 200) or high (> 4,000) number of expressed genes and 2) nuclei with a high percentage of  
602 mitochondrial reads (> 5%). The resulting data were normalized and scored for cell cycle status.  
603 The data were then scaled, with the percentage of mitochondrial reads, percentage of ribosomal  
604 reads, and cell cycle status regressed out. The scaled data were used for PCA, and Harmony  
605 (Korsunsky et al., 2019) was used to correct for batch effect, with 30 PCs. A preliminary  
606 clustering was done on the corrected data with 30 PCs and three clusters with predominantly  
607 cytosolic RNA (high percentage of ribosomal and mitochondrial RNA, low count in the number  
608 of genes and number of molecules) were removed.

609 After the removal, there are 3k to 6k nuclei for each sample. The data were normalized,  
610 scaled, ‘harmonized’ and clustered again as described above, with 30 PCs. There are 21 clusters,

611 with no obvious cluster of doublets based on scores generated by `scrublet` (Wolock et al.,  
612 2019). Cell types were inferred based on marker genes (Karaiskos et al., 2017), and 11 clusters  
613 were identified as early embryonic cell types based on marker gene expression at stage 4-6 [*in*  
614 *situ* database of Berkeley Drosophila Genome Project (Hammonds et al., 2013)] (**Table S2**).  
615 Differentially expressed genes were identified with `FindMarkers` in Seurat.

616 To curate a set of growth-related genes to examine expression changes across cell types,  
617 we used the definition of insulin-like receptor signaling pathway in FlyBase (Gene group  
618 FBgg0000910). Other genes were curated from (Choi et al., 2015), (Welte, 2015), (Heier and  
619 Kühnlein, 2018), and (Heier et al., 2021).

620 The snRNA-seq reads are deposited at ArrayExpress (EMBL-EBI) under experiment no.  
621 E-MTAB-12068.

622

### 623 **Triglycerides quantification assay**

624 The concentration of TGs in embryos was measured using the Triglyceride  
625 Quantification Colorimetric Kit from Sigma (Cat. #MAK266). 50 stage5 embryos were  
626 homogenized in Eppendorf tubes on a Nonidet P40 Substitute (Sigma, Cat. #74385) 5% solution.  
627 The triglycerides concentration in each homogenate was then quantified following the  
628 instructions provided by the manufacturer. Absorbance was measured at 570 nm.

629

### 630 **MALDI-imaging mass spectrometry on sectioned ovaries**

631 Ovaries needed to be cryo-sectioned to prepare the tissue for MALDI-imaging mass spec.  
632 Briefly, a small number of ovaries was embedded in a previously heated 5% m/v  
633 carboxymethylcellulose (Sigma) solution. This solution then solidifies at room temperature, and  
634 the resulting molds were sectioned in a Leica CM1950 cryostat at -20°C, producing slices with a  
635 thickness of 20 µm. These slices were then mounted on regular glass slides.

636 The samples were then coated with a microcrystalline matrix of 2,5-dihydroxybenzoic  
637 acid dissolved in 70% acetonitrile to 15 mg/ml, with the help of a TM-Sprayer robotic sprayer  
638 (HTX Technologies, Carrboro, NC, USA). The sprayer operated at a spray temperature of 80°C,  
639 flow rate of 0.01 ml/min, track spacing of 3 mm and 10 passes, and the estimated surface  
640 concentration was 3µg/mm<sup>2</sup>. The glass slides were then mounted onto a custom adaptor and  
641 loaded into the MS imaging ion source (AP-SMALDI5, TransMIT GmbH, Giessen, Germany).

642 Generated ions were co-axially transferred to a high mass-resolution mass spectrometer  
643 (QExactive Plus mass spectrometer, ThermoFisher Scientific).

644 Metabolite annotation was performed using the METASPACE cloud software  
645 (Alexandrov et al., 2019) with SwissLipids database (Aimo et al., 2015) (version 2018-02-02).  
646 The Principal Component Analysis of these results was performed on R using the FactoMineR  
647 and factoextra packages (<http://factominer.free.fr/>). Enrichment analysis were carried out using  
648 LION/web (Molenaar et al., 2019).

649

### 650 **Dissection of ovarioles**

651 Flies were reared in uncrowded cages with apple juice plates supplied with yeast paste for  
652 48h prior to dissection. 10-12 female flies were dissected for ovaries, which were kept on ice in  
653 PBT with 4% PFA until all samples were processed. The ovaries were then fixed in PBT/PFA  
654 for 30 min, washed twice in PBT and placed in Prolong Gold with DAPI. They were then further  
655 dissected to separate the ovarioles and mounted on glass slides. The slides were imaged on a  
656 Zeiss 880 confocal microscope and scored for ovariole number and oocyte length.

657

### 658 **Larval behavior**

659 Larvae (3<sup>rd</sup> instar, 5 days after egg laying) were harvested from food vials using a 10%  
660 glucose solution and placed on agar plates, where their movement was recorded using a FL3-U3-  
661 13Y3M-C CMOS camera (<https://www.flir.de/products/flea3-usb3/>) for two minutes. Then,  
662 positional information as a function of time was automatically extracted from the videos for each  
663 individual larvae using FIMtrack (Risse et al., 2017). Behavior-related parameters (speed,  
664 bending, etc) were then calculated using this dataset.

665

### 666 **Acknowledgements**

667 We thank Phillip Oel, Leslie Pan, Nikolaos Papadopoulos, Blanca Pijuan-Sala and Xuefei Yuan  
668 for their help and advice in single-nuclei transcriptomics. We thank Ching-Ho Chang for his  
669 advice on genomic analysis. We thank Dimitri Kromm and Lars Hufnagel for their help in light-  
670 sheet imaging. We thank Pinar Onal and Stephen Small for sharing the Bicoid antibody, and  
671 Nicolas Gompel, Artyom Kopp, and Eileen Furlong for sharing *Drosophila* stocks. We also  
672 thank Martijn Molenaar for discussions on the interpretation of the metabolomics data. We thank

673 Pinar Onal and members of the Crocker group for their input on the project, in particular Natalia  
674 Misunou, Mindy Liu Perkins, Albert Tsai, Rafael Galupa, Noa Otilie Borst, and Gilberto  
675 Alvarez Canales for providing feedback on the manuscript. Mattew A. Benton, Claire Standley  
676 and Xitong Liang for feedback on the manuscript. X.C.L. and L.G. are supported by fellowships  
677 from the European Molecular Biology Laboratory Interdisciplinary Postdoc Programme (EIPOD)  
678 under Marie Skłodowska-Curie Actions COFUND (664726 and 847543, respectively). Research  
679 in the Crocker lab is supported by the European Molecular Biology Laboratory (EMBL).

680

#### 681 **Author contributions**

682 Conceptualization: X.C.L., L.G., J.C. Investigation: X.C.L., L.G., M.E., K.R., J.C. Methodology:  
683 X.C.L., L.G., M.E., T.A., J.C. Formal analysis: X.C.L., L.G., J.C. Data curation: X.C.L., L.G.,  
684 J.C. Visualization: X.C.L., L.G., J.C. Software: X.C.L., L.G., J.C. Resources: T.A. Supervision:  
685 T.A., J.C. Project administration: X.C.L., J.C. Funding acquisition: J.C. Writing, original draft:  
686 X.C.L., L.G., J.C. Writing, review & editing: X.C.L., L.G., M.E., K.R., T.A., J.C.

687

#### 688 **Competing interests**

689 The authors declare no competing interests.

690

#### 691 **Supplementary Material**

692 **Fig. S1.** Mutagenesis, experimental evolution and sampling scheme.

693 **Fig. S2.** Response of different populations.

694 **Fig. S3.** Changes in embryo length in evolved populations.

695 **Fig. S4.** Changes in allele frequency in evolved populations.

696 **Fig. S5.** Embryonic phenotypes of the evolved line 2-6-1A.

697 **Fig. S6.** Single-nuclei transcriptomes of the evolved line 2-6-1A.

698 **Fig. S7.** Metabolic alterations in oocytes from the evolved line 2-6-1A.

699 **Fig. S8.** Quantification of crawling behavior of 3<sup>rd</sup>-instar larvae from 2-min videos.

700 **Fig. S9.** Cross *bicoid* transgenes into Ind and Canton-S.

701 **Fig. S10.** Ovaries in different *Drosophila* species.

702 **Table S1.** Viability of stocks carrying 2x-to-6x-*bicoid* (prior to selection).

703 **Table S2.** Marker genes and cell types for clusters in single nuclei RNA-seq.

704 **Supplemental Data File 1 (video).** Light-sheet imaging of eGFP-tagged Bicoid throughout  
705 embryonic development of *4xbcd* embryos.

706 **Supplemental Data File 2 (Microsoft Excel format).** Variants with recurrent changes across  
707 multiple populations between Generation 3 and 7.

708 **Supplemental Data File 3 (Microsoft Excel format).** Marker genes of yolk cluster that are  
709 differentially expressed in the evolved line.

710 **Supplemental Data File 4 (Microsoft Excel format).** Differentially expressed genes between  
711 the evolved line and the other two samples.

712 **Supplemental Data File 5 (Microsoft Word format).** Map of eGFP-Bicoid construct used to  
713 generate the *4xbcd* line in this study.

714

## 715 **Reference**

716 Aimo, L., Liechti, R., Hyka-Nouspikel, N., Niknejad, A., Gleizes, A., Götz, L., Kuznetsov, D.,  
717 David, F.P.A., van der Goot, F.G., Riezman, H., et al. (2015). The SwissLipids knowledgebase  
718 for lipid biology. *Bioinformatics* *31*, 2860–2866. <https://doi.org/10.1093/bioinformatics/btv285>.

719 Alexandrov, T., Ovchinnikova, K., Palmer, A., Kovalev, V., Tarasov, A., Stuart, L.,  
720 Nigmatzianov, R., Fay, D., Contributors, K.M., Gaudin, M., et al. (2019). METASPACE: A  
721 community-populated knowledge base of spatial metabolomes in health and disease. *BioRxiv*  
722 539478. <https://doi.org/10.1101/539478>.

723 Azevedo, R.B.R., French, V., and Partridge, L. (1996). Thermal Evolution of Egg Size in  
724 *Drosophila melanogaster*. *Evolution* (N. Y.) *50*, 2338. <https://doi.org/10.2307/2410702>.

725 Barrick, J.E., Yu, D.S., Yoon, S.H., Jeong, H., Oh, T.K., Schneider, D., Lenski, R.E., and Kim,  
726 J.F. (2009). Genome evolution and adaptation in a long-term experiment with *Escherichia coli*.  
727 *Nature* *461*, 1243–1247. <https://doi.org/10.1038/nature08480>.

728 Bergelson, J., Kreitman, M., Petrov, D.A., Sanchez, A., and Tikhonov, M. (2021). Functional  
729 biology in its natural context: a search for emergent simplicity. *Elife* *10*, 1–12.  
730 <https://doi.org/10.7554/eLife.67646>.

731 Berleth, T., Burri, M., Thoma, G., Bopp, D., Richstein, S., Frigerio, G., Noll, M., and Nüsslein-  
732 Volhard, C. (1988). The role of localization of bicoid RNA in organizing the anterior pattern of  
733 the *Drosophila* embryo. *EMBO J.* *7*, 1749–1756. <https://doi.org/10.1002/j.1460->

734 2075.1988.tb03004.x.



- 735 Bershtein, S., and Tawfik, D.S. (2008). Advances in laboratory evolution of enzymes. *Curr. Opin.*  
736 *Chem. Biol.* *12*, 151–158. <https://doi.org/10.1016/j.cbpa.2008.01.027>.
- 737 Böhni, R., Riesgo-Escovar, J., Oldham, S., Brogiolo, W., Stocker, H., Andruss, B.F.,  
738 Beckingham, K., and Hafen, E. (1999). Autonomous Control of Cell and Organ Size by CHICO,  
739 a *Drosophila* Homolog of Vertebrate IRS1–4. *Cell* *97*, 865–875. <https://doi.org/10.1016/S0092->  
740 [8674\(00\)80799-0](https://doi.org/10.1016/S0092-8674(00)80799-0).
- 741 Bökel, C. (2008). EMS Screens. In *Methods in Molecular Biology* (Clifton, N.J.), pp. 119–138.
- 742 Bothma, J.P., Garcia, H.G., Esposito, E., Schlissel, G., Gregor, T., and Levine, M. (2014).  
743 Dynamic regulation of *eve* stripe 2 expression reveals transcriptional bursts in living *Drosophila*  
744 embryos. *Proc. Natl. Acad. Sci. U. S. A.* *111*, 10598–10603.  
745 <https://doi.org/10.1073/pnas.1410022111>.
- 746 Boyle, E.A., Li, Y.I., and Pritchard, J.K. (2017). An Expanded View of Complex Traits: From  
747 Polygenic to Omnigenic. *Cell* *169*, 1177–1186. <https://doi.org/10.1016/j.cell.2017.05.038>.
- 748 Briscoe, J., and Small, S. (2015). Morphogen rules: design principles of gradient-mediated  
749 embryo patterning. *Development* *142*, 3996–4009. <https://doi.org/10.1242/dev.129452>.
- 750 Busturia, A., and Lawrence, P.A. (1994). Regulation of cell number in *Drosophila*. *Nature* *370*,  
751 561–563. <https://doi.org/10.1038/370561a0>.
- 752 Caprioli, R.M., Farmer, T.B., and Gile, J. (1997). Molecular imaging of biological samples:  
753 localization of peptides and proteins using MALDI-TOF MS. *Anal. Chem.* *69*, 4751–4760. .
- 754 Cheung, D., and Ma, J. (2015). Probing the impact of temperature on molecular events in a  
755 developmental system. *Sci. Rep.* *5*, 13124. <https://doi.org/10.1038/srep13124>.
- 756 Cheung, D., Miles, C., Kreitman, M., and Ma, J. (2014). Adaptation of the length scale and  
757 amplitude of the Bicoid gradient profile to achieve robust patterning in abnormally large  
758 *Drosophila melanogaster* embryos. *Development* *141*, 124–135.  
759 <https://doi.org/10.1242/dev.098640>.
- 760 Choi, S., Lim, D.-S., and Chung, J. (2015). Feeding and Fasting Signals Converge on the LKB1-  
761 SIK3 Pathway to Regulate Lipid Metabolism in *Drosophila*. *PLOS Genet.* *11*, e1005263. .
- 762 Church, S.H., Donoughe, S., de Medeiros, B.A.S., and Extavour, C.G. (2019). Insect egg size  
763 and shape evolve with ecology but not developmental rate. *Nature* *571*, 58–62.  
764 <https://doi.org/10.1038/s41586-019-1302-4>.
- 765 Church, S.H., de Medeiros, B.A.S., Donoughe, S., Márquez Reyes, N.L., and Extavour, C.G.

- 766 (2021). Repeated loss of variation in insect ovary morphology highlights the role of development  
767 in life-history evolution. *Proc. R. Soc. B Biol. Sci.* 288, 20210150.  
768 <https://doi.org/10.1098/rspb.2021.0150>.
- 769 Clark, E., Battistara, M., and Benton, M.A. (2022). A timer gene network is spatially regulated  
770 by the terminal system in the *Drosophila* embryo. *BioRxiv* 2022.01.26.477848.  
771 <https://doi.org/10.1101/2022.01.26.477848>.
- 772 Crocker, J., Ilsley, G.R., and Stern, D.L. (2016). Quantitatively predictable control of *Drosophila*  
773 transcriptional enhancers in vivo with engineered transcription factors. *Nat. Genet.* 48, 292–298.  
774 <https://doi.org/10.1038/ng.3509>.
- 775 Davidson, E.H. (2010). *The Regulatory Genome: Gene Regulatory Networks In Development*  
776 *And Evolution* - Eric H. Davidson - Google Books (Academic Press).
- 777 Davies, J. (2017). Using synthetic biology to explore principles of development. *Dev.* 144,  
778 1146–1158. <https://doi.org/10.1242/dev.144196>.
- 779 Dragosits, M., and Mattanovich, D. (2013). Adaptive laboratory evolution – principles and  
780 applications for biotechnology. *Microb. Cell Fact.* 12, 64. [https://doi.org/10.1186/1475-2859-12-](https://doi.org/10.1186/1475-2859-12-64)  
781 64.
- 782 Driever, W., and Nüsslein-Volhard, C. (1988). The bicoid protein determines position in the  
783 *Drosophila* embryo in a concentration-dependent manner. *Cell* 54, 95–104.  
784 [https://doi.org/10.1016/0092-8674\(88\)90183-3](https://doi.org/10.1016/0092-8674(88)90183-3).
- 785 Dubuis, J.O., Samanta, R., and Gregor, T. (2013). Accurate measurements of dynamics and  
786 reproducibility in small genetic networks. *Mol. Syst. Biol.* 9, 639.  
787 <https://doi.org/https://doi.org/10.1038/msb.2012.72>.
- 788 Engstrom, L.E. (1971). *Studies of the effects of two-way selection for ovariole number in*  
789 *Drosophila melanogaster* (University of Illinois at Urbana-Champaign).
- 790 Frankel, N., Erezyilmaz, D.F., McGregor, A.P., Wang, S., Payre, F., and Stern, D.L. (2011).  
791 Morphological evolution caused by many subtle-effect substitutions in regulatory DNA. *Nature*  
792 474, 598–603. <https://doi.org/10.1038/nature10200>.
- 793 Fuqua, T., Jordan, J., van Breugel, M.E., Halavatyi, A., Tischer, C., Polidoro, P., Abe, N., Tsai,  
794 A., Mann, R.S., Stern, D.L., et al. (2020). Dense and pleiotropic regulatory information in a  
795 developmental enhancer. *Nature* 587, 235–239. <https://doi.org/10.1038/s41586-020-2816-5>.
- 796 Galupa, R., Alvarez-Canales, G., Borst, N.O., Fuqua, T., Gandara, L., Misunou, N., Richter, K.,

- 797 Alves, M.R.P., Karumbi, E., Perkins, M.L., et al. (2022). Enhancer architecture and chromatin  
798 accessibility constrain phenotypic space during development. *BioRxiv* 38, 2022.06.02.494376.  
799 <https://doi.org/10.1101/2022.06.02.494376>.
- 800 Gandara, L., Tsai, A., Ekelöf, M., Galupa, R., Noon, E.P.-B., Alexandrov, T., and Crocker, J.  
801 (2022). Developmental phenomics suggests that H3K4 monomethylation catalyzed by Trr  
802 functions as a phenotypic capacitor. *BioRxiv* 2022.03.15.484407.  
803 <https://doi.org/10.1101/2022.03.15.484407>.
- 804 Garrison, E., and Marth, G. (2012). Haplotype-based variant detection from short-read  
805 sequencing. *ArXiv* 1207.3907. <https://doi.org/10.48550/arxiv.1207.3907>.
- 806 Gilbert, S.F., Bosch, T.C.G., and Ledón-Rettig, C. (2015). Eco-Evo-Devo: developmental  
807 symbiosis and developmental plasticity as evolutionary agents. *Nat. Rev. Genet.* 16, 611–622.  
808 <https://doi.org/10.1038/nrg3982>.
- 809 Good, B.H., McDonald, M.J., Barrick, J.E., Lenski, R.E., and Desai, M.M. (2017). The dynamics  
810 of molecular evolution over 60,000 generations. *Nature* 551, 45–50.  
811 <https://doi.org/10.1038/nature24287>.
- 812 Green, D.A. (2014). *Developmental and Genetic Mechanisms of Ovariole Number Evolution in*  
813 *Drosophila*. Harvard University.
- 814 Gregor, T., Bialek, W., De Ruyter Van Steveninck, R.R., Tank, D.W., and Wieschaus, E.F.  
815 (2005). Diffusion and scaling during early embryonic pattern formation. *Proc. Natl. Acad. Sci. U.*  
816 *S. A.* 102, 18403–18407. <https://doi.org/10.1073/pnas.0509483102>.
- 817 Gregor, T., Wieschaus, E.F., McGregor, A.P., Bialek, W., and Tank, D.W. (2007). Stability and  
818 Nuclear Dynamics of the Bicoid Morphogen Gradient. *Cell* 130, 141–152.  
819 <https://doi.org/10.1016/j.cell.2007.05.026>.
- 820 Hammonds, A.S., Bristow, C.A., Fisher, W.W., Weiszmann, R., Wu, S., Hartenstein, V., Kellis,  
821 M., Yu, B., Frise, E., and Celniker, S.E. (2013). Spatial expression of transcription factors in  
822 *Drosophila* embryonic organ development. *Genome Biol.* 14, R140. [https://doi.org/10.1186/gb-](https://doi.org/10.1186/gb-2013-14-12-r140)  
823 [2013-14-12-r140](https://doi.org/10.1186/gb-2013-14-12-r140).
- 824 Heier, C., and Kühnlein, R.P. (2018). Triacylglycerol metabolism in *drosophila melanogaster*.  
825 *Genetics* 210, 1163–1184. <https://doi.org/10.1534/genetics.118.301583>.
- 826 Heier, C., Klishch, S., Stilbytska, O., Semaiuk, U., and Lushchak, O. (2021). The *Drosophila*  
827 model to interrogate triacylglycerol biology. *Biochim. Biophys. Acta - Mol. Cell Biol. Lipids*

828 1866, 158924. <https://doi.org/10.1016/j.bbali.2021.158924>.

829 Houchmandzadeh, B., Wieschaus, E., and Leibler, S. (2002). Establishment of developmental  
830 precision and proportions in the early *Drosophila* embryo. *Nature* 415, 798–802.  
831 <https://doi.org/10.1038/415798a>.

832 Houle, D., Govindaraju, D.R., and Omholt, S. (2010). Phenomics: the next challenge. *Nat. Rev.*  
833 *Genet.* 11, 855–866. <https://doi.org/10.1038/nrg2897>.

834 Huang, A., Rupprecht, J.-F., and Saunders, T.E. (2020). Embryonic geometry underlies  
835 phenotypic variation in decanalized conditions. *Elife* 9, 1–21.  
836 <https://doi.org/10.7554/eLife.47380>.

837 Jacob, F. (1982). *The possible and the actual* (University of Washington Press).

838 Jha, A.R., Miles, C.M., Lippert, N.R., Brown, C.D., White, K.P., and Kreitman, M. (2015).  
839 Whole-Genome Resequencing of Experimental Populations Reveals Polygenic Basis of Egg-  
840 Size Variation in *Drosophila melanogaster*. *Mol. Biol. Evol.* 32, 2616–2632.  
841 <https://doi.org/10.1093/molbev/msv136>.

842 Karaiskos, N., Wahle, P., Alles, J., Boltengagen, A., Ayoub, S., Kipar, C., Kocks, C., Rajewsky,  
843 N., and Zinzen, R.P. (2017). The *Drosophila* embryo at single-cell transcriptome resolution.  
844 *Science* (80-. ). 358, 194–199. <https://doi.org/10.1126/science.aan3235>.

845 Korsunsky, I., Millard, N., Fan, J., Slowikowski, K., Zhang, F., Wei, K., Baglaenko, Y., Brenner,  
846 M., Loh, P. ru, and Raychaudhuri, S. (2019). Fast, sensitive and accurate integration of single-  
847 cell data with Harmony. *Nat. Methods* 16, 1289–1296. [https://doi.org/10.1038/s41592-019-0619-](https://doi.org/10.1038/s41592-019-0619-0)  
848 0.

849 Langmead, B., and Salzberg, S.L. (2012). Fast gapped-read alignment with Bowtie 2. *Nat*  
850 *Methods* 9, 357–359. <https://doi.org/10.1038/nmeth.1923>.

851 Lenski, R.E. (2017). Experimental evolution and the dynamics of adaptation and genome  
852 evolution in microbial populations. *ISME J.* 11, 2181–2194.  
853 <https://doi.org/10.1038/ismej.2017.69>.

854 Lenski, R.E., Ofria, C., Pennock, R.T., and Adami, C. (2003). The evolutionary origin of  
855 complex features. *Nature* 423, 139–144. <https://doi.org/10.1038/nature01568>.

856 Levy, S.F., Blundell, J.R., Venkataram, S., Petrov, D.A., Fisher, D.S., and Sherlock, G. (2015).  
857 Quantitative evolutionary dynamics using high-resolution lineage tracking. *Nature* 519, 181–186.  
858 <https://doi.org/10.1038/nature14279>.

859 Liu, X., Li, Y.I., and Pritchard, J.K. (2019). Trans Effects on Gene Expression Can Drive  
860 Omnigenic Inheritance. *Cell* *177*, 1022-1034.e6.  
861 <https://doi.org/10.1016/j.cell.2019.04.014>.

862 Lobell, A.S., Kaspari, R.R., Serrano Negron, Y.L., and Harbison, S.T. (2017). The genetic  
863 architecture of Ovariole number in *Drosophila melanogaster*: Genes with major, quantitative, and  
864 pleiotropic effects. *G3 Genes, Genomes, Genet.* *7*, 2391–2403.  
865 <https://doi.org/10.1534/g3.117.042390>.

866 Lott, S.E., Kreitman, M., Palsson, A., Alekseeva, E., and Ludwig, M.Z. (2007). Canalization of  
867 segmentation and its evolution in *Drosophila*. *Proc. Natl. Acad. Sci.* *104*, 10926–10931.  
868 <https://doi.org/10.1073/pnas.0701359104>.

869 Mallard, F., Nolte, V., Tobler, R., Kapun, M., and Schlötterer, C. (2018). A simple genetic basis  
870 of adaptation to a novel thermal environment results in complex metabolic rewiring in  
871 *Drosophila*. *Genome Biol.* *19*, 1–15. <https://doi.org/10.1186/s13059-018-1503-4>.

872 Mensch, J., Di Battista, C., De Majo, M.S., Campos, R.E., and Fischer, S. (2021). Increased size  
873 and energy reserves in diapausing eggs of temperate *Aedes aegypti* populations. *J. Insect Physiol.*  
874 *131*. <https://doi.org/10.1016/J.JINSPHYS.2021.104232>.

875 Miles, C.M., Lott, S.E., Hendriks, C.L.L., Ludwig, M.Z., Manu, Williams, C.L., and Kreitman,  
876 M. (2011). Artificial selection on egg size perturbs early pattern formation in *Drosophila*  
877 *melanogaster*. *Evolution (N. Y.)*. *65*, 33–42. <https://doi.org/10.1111/j.1558-5646.2010.01088.x>.

878 Miyazawa, H., and Aulehla, A. (2018). Revisiting the role of metabolism during development.  
879 *Development* *145*. <https://doi.org/10.1242/dev.131110>.

880 Moczek, A.P., Sultan, S., Foster, S., Ledón-Rettig, C., Dworkin, I., Nijhout, H.F., Abouheif, E.,  
881 and Pfennig, D.W. (2011). The role of developmental plasticity in evolutionary innovation. *Proc.*  
882 *R. Soc. B Biol. Sci.* *278*, 2705–2713. <https://doi.org/10.1098/rspb.2011.0971>.

883 Molenaar, M.R., Jeucken, A., Wassenaar, T.A., van de Lest, C.H.A., Brouwers, J.F., and Helms,  
884 J.B. (2019). LION/web: a web-based ontology enrichment tool for lipidomic data analysis.  
885 *Gigascience* *8*, giz061. <https://doi.org/10.1093/gigascience/giz061>.

886 Namba, R., Pazdera, T.M., Cerrone, R.L., and Minden, J.S. (1997). *Drosophila* embryonic  
887 pattern repair: How embryos respond to bicoid dosage alteration. *Development* *124*, 1393–1403. .

888 Némec, V. (2002). Quantitative changes in protein, glycogen and fat content in the eggs of the  
889 locusts, *Locusta migratoria migratorioides* and *Schistocerca gregaria* (Orthoptera), during



890 embryogenesis. *Eur. J. Entomol.* *99*, 557–559. <https://doi.org/10.14411/eje.2002.072>.

891 Nüsslein-Volhard, C., and Wieschaus, E. (1980). Mutations affecting segment number and  
892 polarity in *Drosophila*. *Nature* *287*, 795–801. <https://doi.org/10.1038/287795a0>.

893 Oldham, S., Stocker, H., Laffargue, M., Wittwer, F., Wymann, M., and Hafen, E. (2002). The  
894 *Drosophila* insulin/IGF receptor controls growth and size by modulating PtdInsP3 levels.  
895 *Development* *129*, 4103–4109. <https://doi.org/10.1242/DEV.129.17.4103>.

896 Orr, H. (1998). The population genetics of adaptation: the distribution of factors fixed during  
897 adaptive evolution. *Evolution* (N. Y.) *52*, 935–949. .

898 Payne, F. (1920). Selection for high and low bristle number in the mutant strain “reduced.”  
899 *Genetics* *5*, 501–542. <https://doi.org/10.1093/genetics/5.6.501>.

900 Perkins, M.L., Gandara, L., and Crocker, J. (2022). A synthetic synthesis to explore animal  
901 evolution and development. *Philos. Trans. R. Soc. B Biol. Sci.* *377*, 20200517.  
902 <https://doi.org/10.1098/rstb.2020.0517>.

903 Risse, B., Berh, D., Otto, N., Klämbt, C., and Jiang, X. (2017). FIMTrack: An open source  
904 tracking and locomotion analysis software for small animals. *PLOS Comput. Biol.* *13*,  
905 e1005530. .

906 Rockman, M. V (2012). The QTN Program and the Alleles That Matter for Evolution: All That’s  
907 Gold Does Not Glitter. *Evolution* (N. Y.) *66*, 1–17. [https://doi.org/10.1111/j.1558-](https://doi.org/10.1111/j.1558-5646.2011.01486.x)  
908 [5646.2011.01486.x](https://doi.org/10.1111/j.1558-5646.2011.01486.x).

909 Rudman, S.M., Greenblum, S.I., Rajpurohit, S., Betancourt, N.J., Hanna, J., Tilk, S., Yokoyama,  
910 T., Petrov, D.A., and Schmidt, P. (2022). Direct observation of adaptive tracking on ecological  
911 time scales in *Drosophila*. *Science* (80-. ). *375*. <https://doi.org/10.1126/science.abj7484>.

912 Sandberg, T.E., Salazar, M.J., Weng, L.L., Palsson, B.O., and Feist, A.M. (2019). The  
913 emergence of adaptive laboratory evolution as an efficient tool for biological discovery and  
914 industrial biotechnology. *Metab. Eng.* *56*, 1–16.  
915 <https://doi.org/https://doi.org/10.1016/j.ymben.2019.08.004>.

916 Schlötterer, C., Tobler, R., Kofler, R., and Nolte, V. (2014). Sequencing pools of individuals-  
917 mining genome-wide polymorphism data without big funding. *Nat. Rev. Genet.* *15*, 749–763.  
918 <https://doi.org/10.1038/nrg3803>.

919 Stuart, T., Butler, A., Hoffman, P., Hafemeister, C., Papalexi, E., Mauck, W.M., Hao, Y.,  
920 Stoeckius, M., Smibert, P., and Satija, R. (2019). Comprehensive Integration of Single-Cell Data.

921 Cell 177, 1888–1902.e21. <https://doi.org/10.1016/j.cell.2019.05.031>.

922 Suvorov, A., Kim, B.Y., Wang, J., Armstrong, E.E., Peede, D., D’Agostino, E.R.R., Price, D.K.,  
923 Waddell, P., Lang, M., Courtier-Orgogozo, V., et al. (2022). Widespread introgression across a  
924 phylogeny of 155 *Drosophila* genomes. *Curr. Biol.* 32, 111–123.e5.  
925 <https://doi.org/10.1016/j.cub.2021.10.052>.

926 Teleman, A.A., Chen, Y.W., and Cohen, S.M. (2005). *Drosophila* melted modulates FOXO and  
927 TOR activity. *Dev. Cell* 9, 271–281. <https://doi.org/10.1016/j.devcel.2005.07.004>.

928 Tennessen, J.M., Bertagnolli, N.M., Evans, J., Sieber, M.H., Cox, J., and Thummel, C.S. (2014).  
929 Coordinated Metabolic Transitions During *Drosophila* Embryogenesis and the Onset of Aerobic  
930 Glycolysis. *G3 Genes|Genomes|Genetics* 4, 839–850. <https://doi.org/10.1534/g3.114.010652>.

931 Tu, M.-P., and Tatar, M. (2003). Juvenile diet restriction and the aging and reproduction of adult  
932 *Drosophila melanogaster*. *Aging Cell* 2, 327–333. [https://doi.org/https://doi.org/10.1046/j.1474-](https://doi.org/https://doi.org/10.1046/j.1474-9728.2003.00064.x)  
933 [9728.2003.00064.x](https://doi.org/https://doi.org/10.1046/j.1474-9728.2003.00064.x).

934 Turner, T.L., Stewart, A.D., Fields, A.T., Rice, W.R., and Tarone, A.M. (2011). Population-  
935 based resequencing of experimentally evolved populations reveals the genetic basis of body size  
936 variation in *Drosophila melanogaster*. *PLoS Genet.* 7.  
937 <https://doi.org/10.1371/journal.pgen.1001336>.

938 Wang, K., Li, M., and Hakonarson, H. (2010). ANNOVAR: functional annotation of genetic  
939 variants from high-throughput sequencing data. *Nucleic Acids Res.* 38, e164–e164.  
940 <https://doi.org/10.1093/nar/gkq603>.

941 Weber, M. (2022). *Philosophy of Developmental Biology* (Cambridge: Cambridge University  
942 Press).

943 Welte, M.A. (2015). As the fat flies: The dynamic lipid droplets of *Drosophila* embryos.  
944 *Biochim. Biophys. Acta - Mol. Cell Biol. Lipids* 1851, 1156–1185.  
945 <https://doi.org/https://doi.org/10.1016/j.bbalip.2015.04.002>.

946 White, C.R., Alton, L.A., Bywater, C.L., Lombardi, E.J., and Marshall, D.J. (2022). Metabolic  
947 scaling is the product of life-history optimization. *Science* (80-. ). 377, 834–839.  
948 <https://doi.org/10.1126/SCIENCE.ABM7649>.

949 Wittkopp, P.J., and Kalay, G. (2012). Cis-regulatory elements: Molecular mechanisms and  
950 evolutionary processes underlying divergence. *Nat. Rev. Genet.* 13, 59–69.  
951 <https://doi.org/10.1038/nrg3095>.

952 Wolock, S.L., Lopez, R., and Klein, A.M. (2019). Scrublet: Computational Identification of Cell  
953 Doublets in Single-Cell Transcriptomic Data. *Cell Syst.* 8, 281-291.e9.  
954 <https://doi.org/10.1016/j.cels.2018.11.005>.

955 Wood, A.R., Esko, T., Yang, J., Vedantam, S., Pers, T.H., Gustafsson, S., Chu, A.Y., Estrada, K.,  
956 Luan, J., Kutalik, Z., et al. (2014). Defining the role of common variation in the genomic and  
957 biological architecture of adult human height. *Nat. Genet.* 46, 1173. .

958 Yengo, L., Sidorenko, J., Kemper, K.E., Zheng, Z., Wood, A.R., Weedon, M.N., Frayling, T.M.,  
959 Hirschhorn, J., Yang, J., and Visscher, P.M. (2018). Meta-analysis of genome-wide association  
960 studies for height and body mass index in ~700000 individuals of European ancestry. *Hum. Mol.*  
961 *Genet.* 27, 3641–3649. <https://doi.org/10.1093/hmg/ddy271>.

962 Zhang, W., Reeves, G.R., and Tautz, D. (2021). Testing Implications of the Omnigenic Model  
963 for the Genetic Analysis of Loci Identified through Genome-wide Association. *Curr. Biol.* 31,  
964 1092-1098.e6. <https://doi.org/https://doi.org/10.1016/j.cub.2020.12.023>.

965 Zirin, J., Hu, Y., Liu, L., Yang-Zhou, D., Colbeth, R., Yan, D., Ewen-Campen, B., Tao, R., Vogt,  
966 E., VanNest, S., et al. (2020). Large-Scale Transgenic *Drosophila* Resource Collections for Loss-  
967 and Gain-of-Function Studies. *Genetics* 214, 755–767.  
968 <https://doi.org/10.1534/genetics.119.302964>.

969
